# Supplementary material for: Natural Variation OsCd1<sup>V449</sup> Contributes to Reducing Cadmium Accumulation in Rice Grain
Source: Preprints.org preprint supplement (doi:10.20944/preprints201802.0075.v1), 2018-02-09
Supplement: Supplementary file 1 [file supplementary]

## Table of contents

### Supplementary Figures

- Supplementary Figure 1. Overview of a composite method ‘bioinformatics tool-box’
- Supplementary Figure 2. *Indica* varieties show higher grain Cd accumulation level than *japonica* varieties
- Supplementary Figure 3. Sequence analysis of *OsCd1*
- Supplementary Figure 4. Phylogenetic analysis of *OsCd1* with rice MFS members
- Supplementary Figure 5. Effect of *OsCd1* mutation on rice productivity
- Supplementary Figure 6. Transcript expression analysis of *OsCd1* in transgenic yeast
- Supplementary Figure 7. The schematic of NIL genotype and grain Cd accumulation in the parent 9311 and *Nipponbare*
- Supplementary Figure 8. PCA plots of the first two components of a full population (446 *O. rufipogon* accessions plus 950 *O. sativa* varieties)

## Supplementary Tables

- Supplementary Table 1. The grain cadmium accumulation in *japonica* and *indica*
- Supplementary Table 2. The QTLs identified from Genome-wide association study of rice grain cadmium accumulation
- Supplementary Table 3. The annotated genes in the 12 QTLs
- Supplementary Table 4. The candidate genes and the Go Slim assignments for annotated genes in QTLs
- Supplementary Table 5. The members of Major Facilitator Superfamily (MFS) in rice
- Supplementary Table 6. *OsCd1* sequence variation in 127 rice cultivars
- Supplementary Table 7. The haplotype of *OsCd1* separated by SNP22
- Supplementary Table 8. The simple sequence repeat (SSR) primers in Chromosome 3 of NIL
- Supplementary Table 9. The SNP22 in 127 rice cultivars
- Supplementary Table 10. The SNP22 in 950 rice cultivars
- Supplementary Table 11. The SNP22 in 446 wild rice species
- Supplementary Table 12. The level of population differentiation (*F<sub>st</sub>*)
- Supplementary Table 13. The sequences for primers used in this study
- Supplementary Table 14. SgRNA in *CRISPR-osc1* vector construction

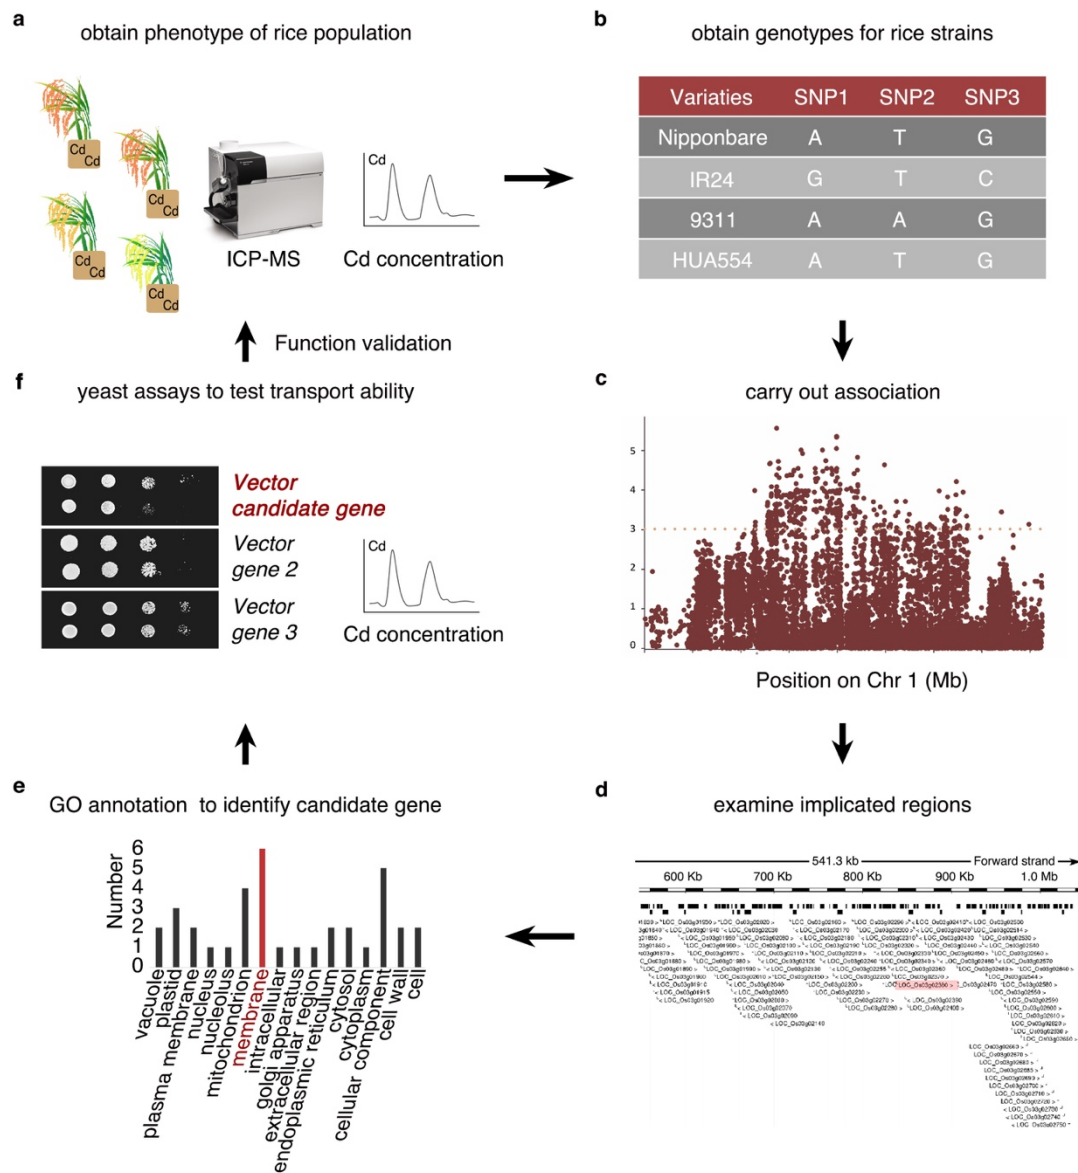

## Supplementary Figure 1

### Overview of a composite method 'bioinformatics tool-box'

The genes underlying rice grain Cd accumulation was identified following a common general approach. **(a)** rice cultivars in the study are phenotyped for the grain Cd accumulation traits. **(b)** Genotypes for each rice cultivars are then obtained by direct genotyping. **(c)** GWAS is then carried out, typically using a statistical method for correcting for population structure. **(d)** Implicated regions are then examined via rice genome annotation project website (MSU-RGAP). **(e)** The examined genes were analyzed by GO annotation to select candidate genes **(f)** The candidate genes were then conducted with yeast assays to test the transport ability, the function gene which are then validated furtherly in rice.

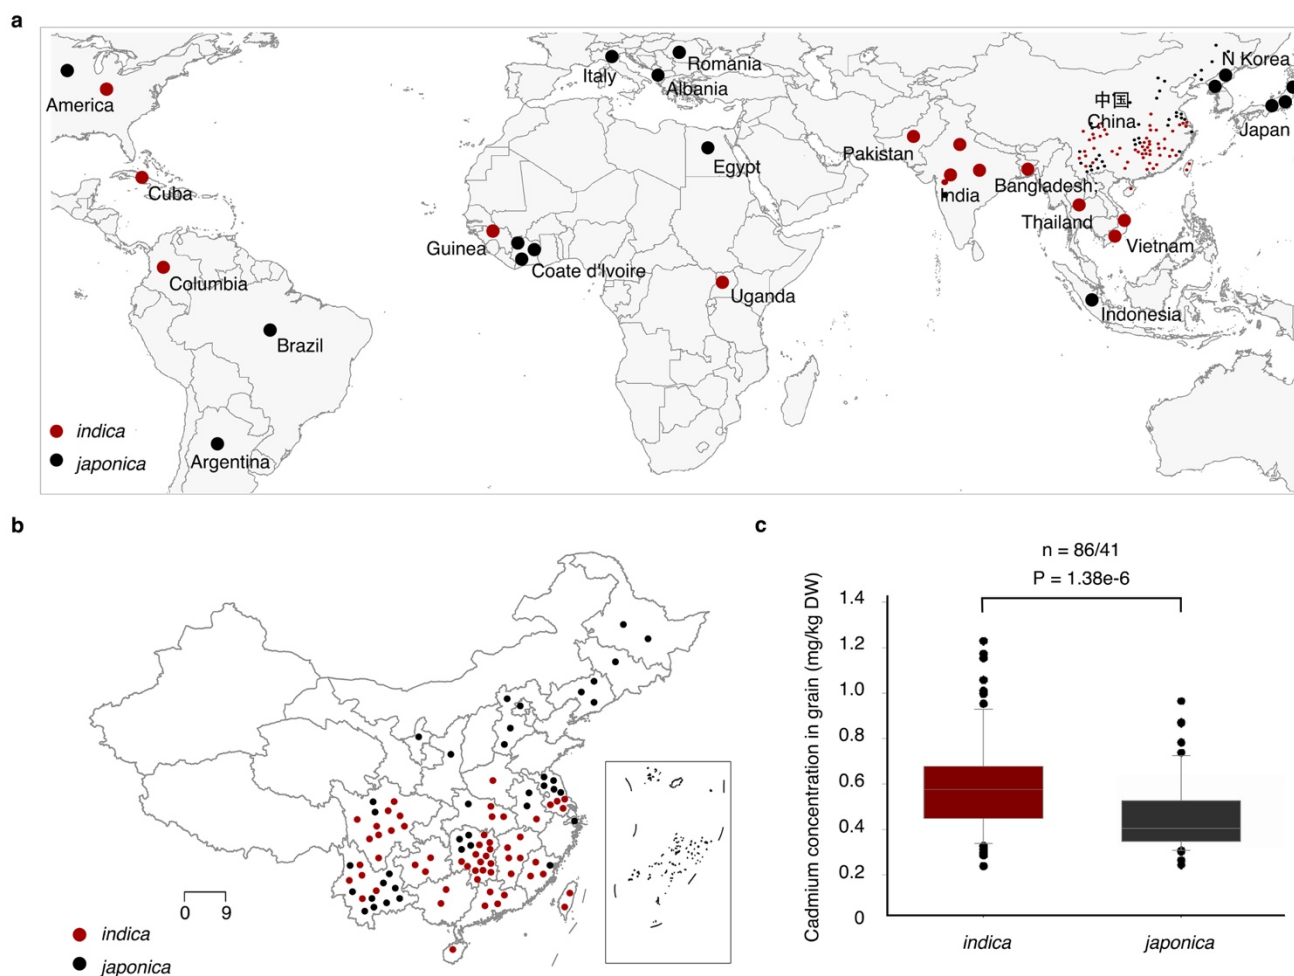

## Supplementary Figure 2

### *Indica* varieties show higher grain Cd accumulation level than *japonica* varieties

**(a) and (b)** The geographical distribution of the rice cultivars in the world **(a)** and China **(b)**. The red dots indicate the *indica* cultivars and the black dots indicate the *japonica* cultivars. **(c)** Comparison of grain Cd concentration between 86 *indica* and 41 *japonica* varieties. P values were generated from Student's t-test between *indica* and *japonica* varieties.



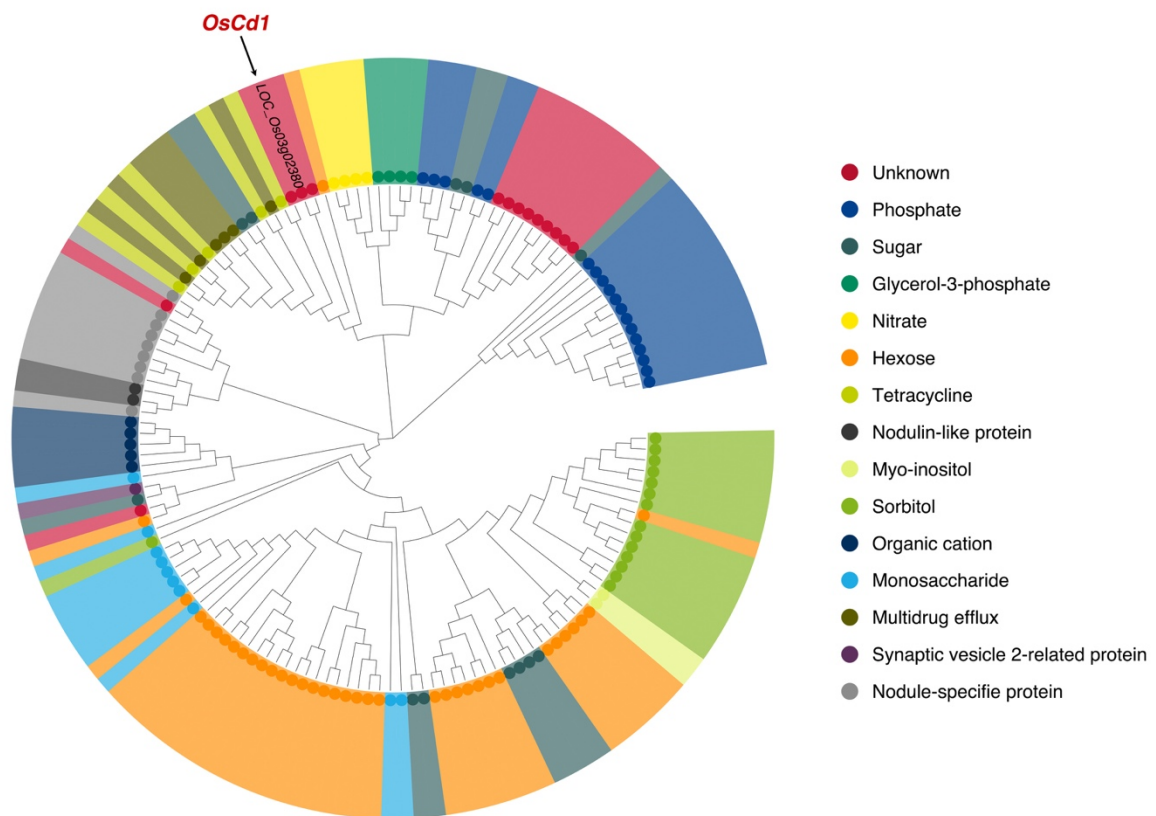

## Supplementary Figure 4

### Phylogenetic analysis of *OsCd1* with rice MFS members

Neighbor-joining phylogenetic relationship of *OsCd1* with MFS proteins in rice. *OsCd1* is indicated and the MFS proteins with different predicted substrates are colored in differentially.

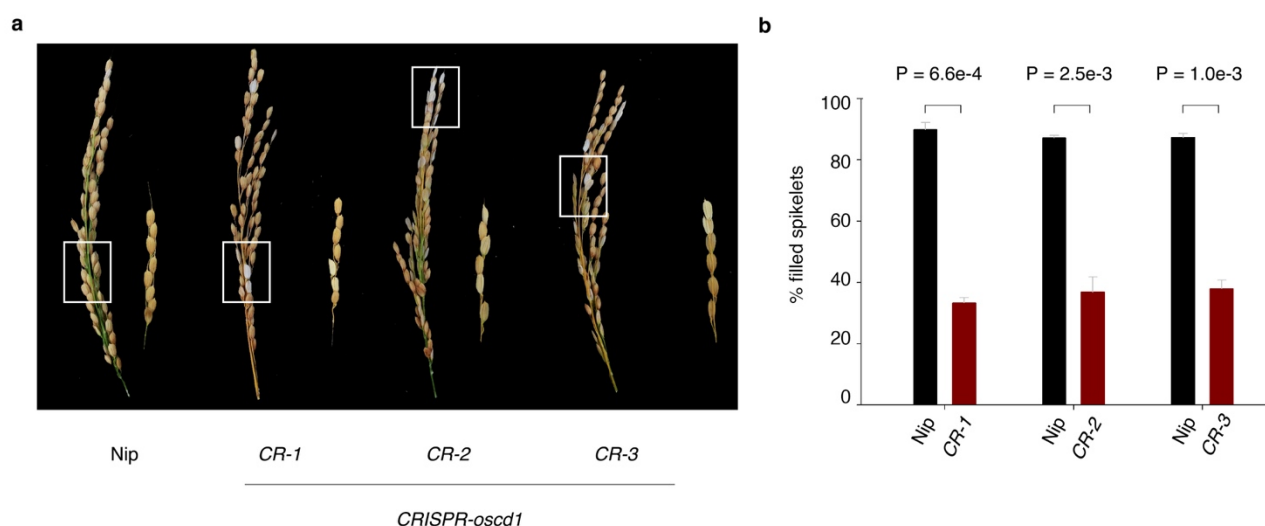

## Supplementary Figure 5

### Effect of OsCd1 mutation on rice productivity

**(a)** Growth of the spikelets in wild-type rice and three *CRISPR-oscd1* lines at harvest. **(b)** Fertility of the seeds.

The *CRISPR-oscd1* lines were shown in red and the *Nipponbare* was shown in black. Error bars, mean  $\pm$ SE.

Statistical comparison was performed by Wilcoxon matched-pairs signed-rank. All data were compared with

*Nipponbare*.

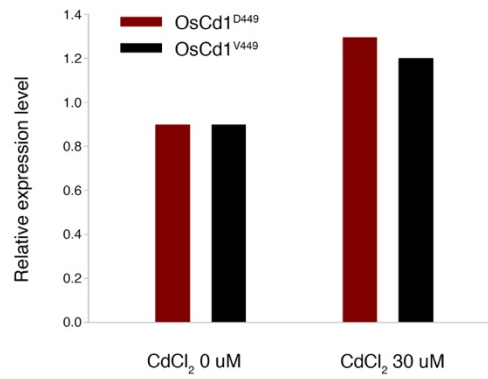

## Supplementary Figure 6

### Transcript expression analysis of *OsCd1* in transgenic yeast

Transcript expression assay of OsCd1<sup>D449</sup> and OsCd1<sup>V449</sup> in transgenic yeast. The transcript level was determined by qPCR.



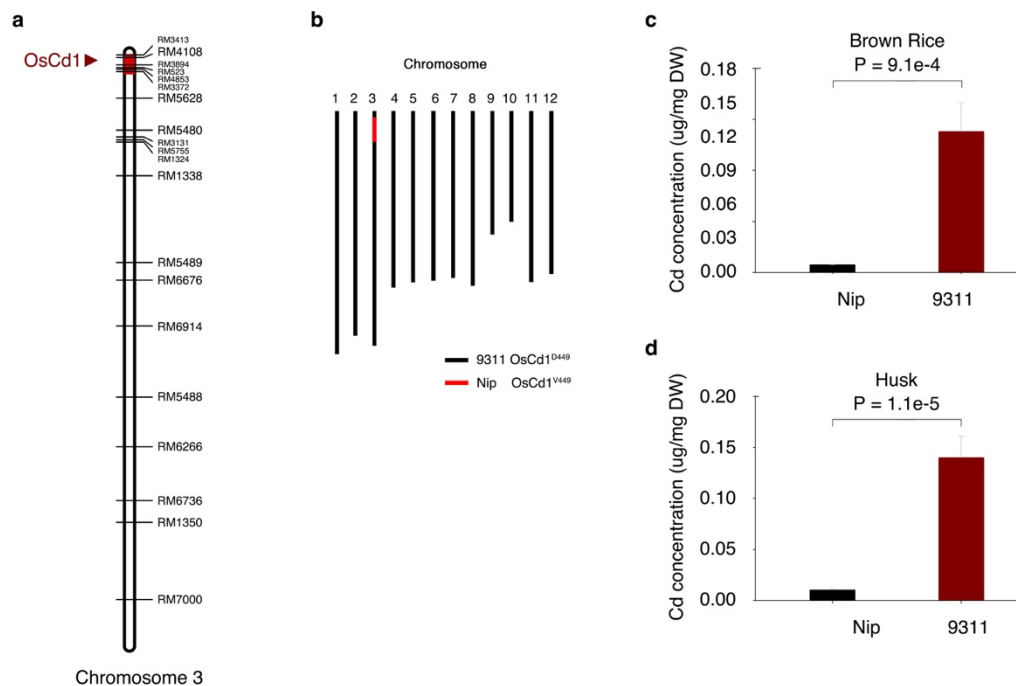

## Supplementary Figure 7

### The Schematic of NIL genotype and grain Cd accumulation in the parent 9311 and *Nipponbare*

**(a)** Graphical genotyping of NIL involving the OsCd1 on chromosome 3. Red bars represent the substituted segments in NIL. The numbers on the right of thick black lines were the simple sequence repeat (SSR) molecular makers. **(b)** Schematic of NIL genotype. Black bar, genomic region from 9311; red bar, genomic region from *Nipponbare*. **(c and d)** Concentration of Cd in the brown rice (**c**) and husk (**d**). The 9311 is shown in red and the *Nipponbare* was shown in black. Error bars, mean  $\pm$ SE. Statistical comparison was performed by Wilcoxon matched-pairs signed-rank. All data were compared with 9311.

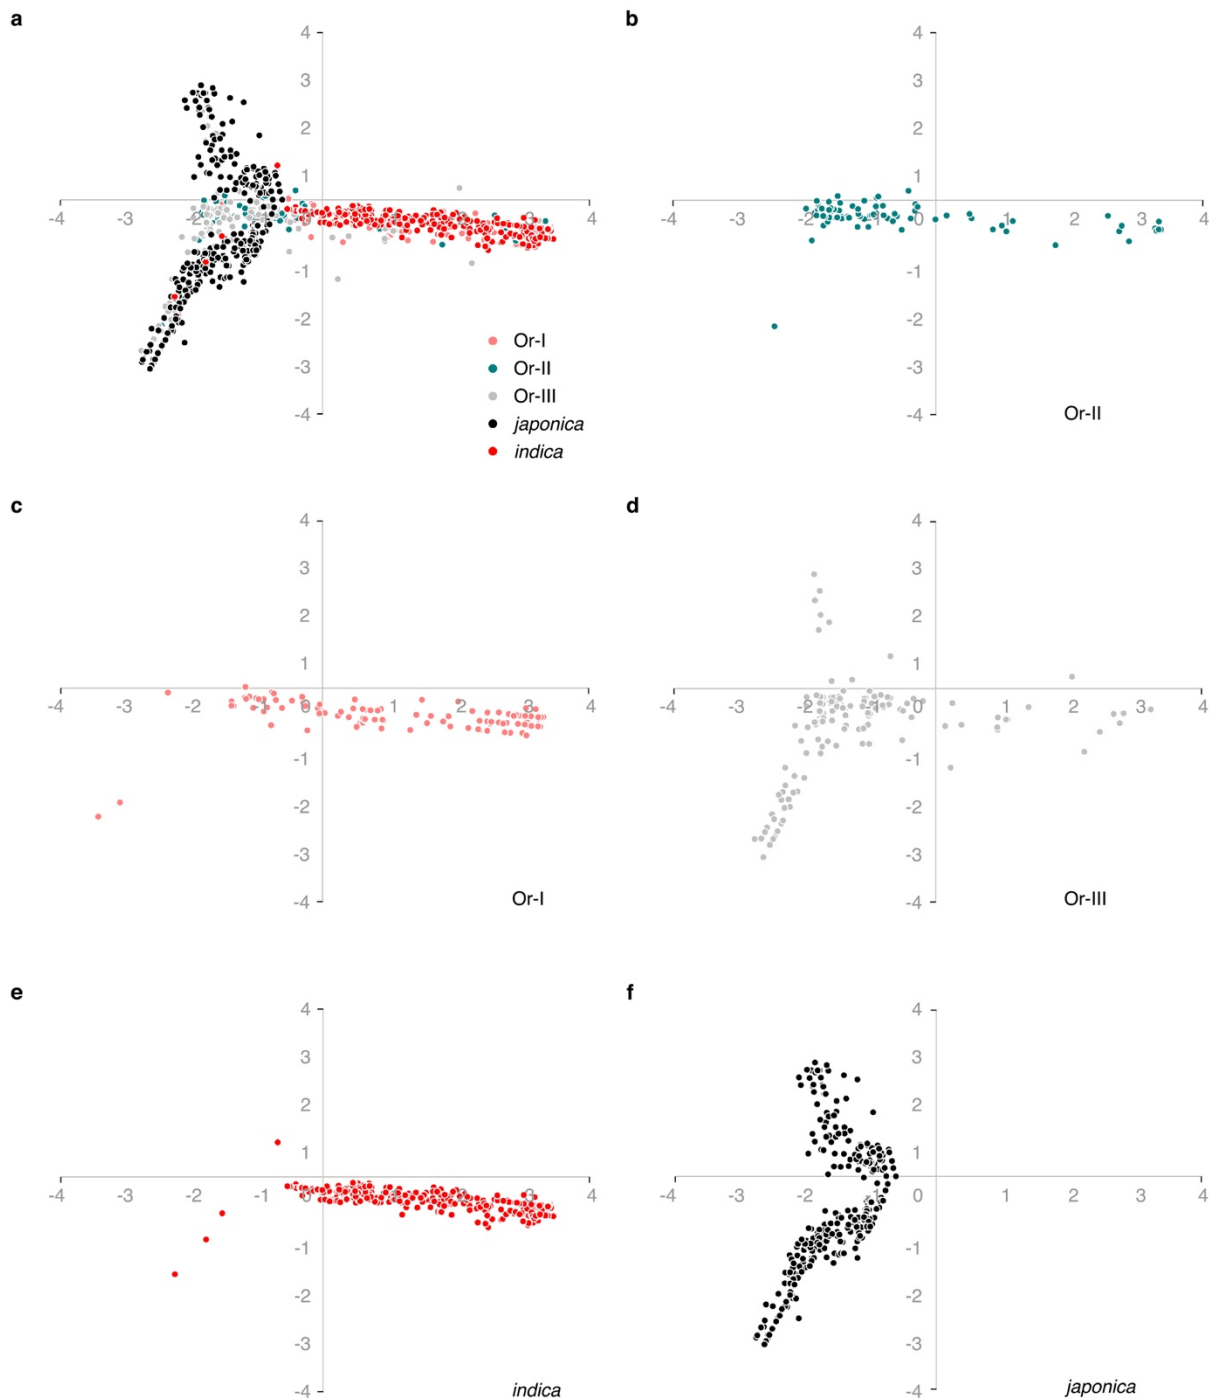

**Supplementary Figure 8**

**PCA plots of the first two components of a full population (446 *O. rufipogon* accessions plus 950 *O. sativa* varieties)**

The three types of *O. rufipogon* (Or-I (c), Or-II (b) and Or-III (d)) were color-coded as pink, light blue and light grey. The two subspecies of *O. sativa* (*indica* (e) and *japonica* (f)) were colored in black and red, respectively.

**Supplementary Table 2. The QTLs identified from Genome-wide association study of rice grain cadmium accumulation**

| <b>Name</b> | <b>Chromosome</b> | <b>start</b>  | <b>stop</b>   | <b>Contribution</b> |
|-------------|-------------------|---------------|---------------|---------------------|
| QTL1        | chr2              | 6756894       | 7048723       | 17.0%               |
| QTL2        | chr2              | 8915797       | 8951020       | 16.3%               |
| <b>QTL3</b> | <b>chr3</b>       | <b>519263</b> | <b>995454</b> | <b>20.7%</b>        |
| QTL4        | chr3              | 1222782       | 1321781       | 16.1%               |
| QTL5        | chr3              | 1681658       | 1907570       | 15.1%               |
| QTL6        | chr4              | 27363626      | 27685989      | 17.1%               |
| QTL7        | chr5              | 9283326       | 9577230       | 15.8%               |
| QTL8        | chr5              | 9889823       | 10112084      | 17.8%               |
| QTL9        | chr5              | 12006893      | 12200901      | 14.1%               |
| QTL10       | chr6              | 175373        | 304839        | 16.6%               |
| QTL11       | chr10             | 20003546      | 20361883      | 20.7%               |
| QTL12       | chr10             | 20363169      | 20860856      | 17.1%               |

**Supplementary Table 8 The simple sequence repeat (SSR) primers in Chromosome 3 of NIL**

| <b>Name</b> | <b>motif</b> | <b>repeat</b> | <b>length</b> | <b>position</b> |
|-------------|--------------|---------------|---------------|-----------------|
| RM3413      | TC           | 9             | 182           | 599763          |
| RM4108      | AT           | 35            | 230           | 770202          |
| RM3894      | AC           | 6             | 171           | 1336332         |
| RM523       | TC           | 6             | 235           | 1530589         |
| RM4853      | AT           | 12            | 103           | 1586664         |
| RM3372      | CT           | 7             | 230           | 1652913         |
| RM5628      | AAG          | 9             | 388           | 3593958         |
| RM5480      | CT           | 18            | 166           | 5805929         |
| RM3131      | AC           | 21            | 165           | 6350074         |
| RM5755      | GTA          | 15            | 164           | 6455920         |
| RM1324      | CT           | 15            | 214           | 6538028         |
| RM1338      | AG           | 10            | 163           | 8929903         |
| RM3297      | AG           | 20            | 315           | 14910690        |
| RM5489      | TC           | 13            | 275           | 14928299        |
| RM6676      | AAT          | 18            | 328           | 16136255        |
| RM6914      | AAT          | 29            | 188           | 19299263        |
| RM5488      | GA           | 9             | 115           | 24198502        |
| RM6266      | TCC          | 4             | 140           | 27617006        |
| RM6736      | ATT          | 10            | 267           | 31331873        |
| RM1350      | AG           | 36            | 234           | 32815272        |
| RM7000      | ATT          | 8             | 351           | 38140768        |

**Supplementary Table 13 The sequences for primers used in this study**

| <b>name</b>          | <b>sequence</b>                                     |
|----------------------|-----------------------------------------------------|
| OsCd1 S              | ATGGAGGTGTTCTACTACCTCGTG                            |
| OsCd1 R              | TTAAGGATTCAGTGGCTCATCTTCATCATC                      |
| pAG413-OsCd1 S       | gaaaaaaccccgattctagaATGGAGGTGTTCTACTACCTCGTG        |
| pAG413-OsCd1 R       | taactaattacatgactcgagTTAAGGATTCAGTGGCTCATCTTCATCATC |
| pMDC45-OsCd1 S       | gtaaaacgacggccagtgccGTGCAGCGTGACCCGGTCGTGCCCC       |
| pMDC45-OsCd1 R       | actcatttttctaccggtaTTGAAGCGGAGGTGCCGACGGGTGG        |
| pCAMBIA1391Z-OsCd1 S | cccaagcttTACAGGTCATTCAACCTCACAGCCT                  |
| pCAMBIA1391Z-OsCd1 R | ccggaattcTTGGCGGCGTTACTGACACAATTCT                  |
| qPCR-OsCd1 S         | TCAGCTGCATCACCAAGCACT                               |
| qPCR-OsCd1 R         | TCTCTTGTTGTGCTCCGCGA                                |
| qPCR-Histon S        | AGTTTGGTCGCTCTCGATTTCG                              |
| qPCR-Histon R        | TCAACAAGTTGACCACGTCACG                              |
| CRISPR-OsCd1-CR1 S   | CCTGTGAGGCTGTGAGTCTG                                |
| CRISPR-OsCd1-CR1 R   | TGCAACCTTGAACCTGGGACA                               |
| CRISPR-OsCd1-CR2 S   | CTGTGTGTTTCAGGGGGAGG                                |
| CRISPR-OsCd1-CR2 R   | AAAGCATCAGTGTGAGGGGG                                |
| CRISPR-OsCd1-CR3 S   | CTTGGCGCATTTTCGTCCTC                                |
| CRISPR-OsCd1-CR3 R   | GAAATGTGTGAGCGTCCAGT                                |

Supplementary Table 14 SgRNA in *CRISPR-oscd1* vector construction

| name                     | sgRNA                |
|--------------------------|----------------------|
| <i>CRISPR-oscd1</i> CR-1 | GCCTGGTCGCAATTGTATCC |
| <i>CRISPR-oscd1</i> CR-2 | GCTTCTCGGCGTTCGAGTCA |
| <i>CRISPR-oscd1</i> CR-3 | GATGAGGATCTTGTACTCGG |
