# Supplementary material for: Natural Variation OsCd1<sup>V449</sup> Contributes to Reducing Cadmium Accumulation in Rice Grain
Source: Preprints.org preprint supplement (doi:10.20944/preprints201802.0075.v1), 2018-02-09
Supplement: Supplementary file 1 [file Table S1.xlsx]

## Sheet: Table S1
Supplementary Table 1. The grain cadmium accumulation in japonica and indica
Taxa	J/I	Grain Cd concentration (mg/kg)		J/I: japonica/indica
CH1002	japonica	0.314382
CH1003	japonica	0.204727
CH1005	japonica	0.263791
CH1010	japonica	0.146043
CH1021	japonica	0.280239
CH1026	japonica	0.308605
CH1027	japonica	0.228131
CH1035	japonica	0.107529
CH1052	japonica	0.336234
CH1054	japonica	0.47427
CH1058	japonica	0.111147
CH1060	japonica	0.195344
CH1083	japonica	0.147747
CH1084	japonica	0.25091
CH1118	japonica	0.150515
CH1119	japonica	0.126673
CH1125	japonica	0.136527
CH1148	japonica	0.28862
CH1150	japonica	0.253687
CH1160	japonica	0.101115
CH1180	japonica	0.0991071
CH1183	japonica	0.0849109
CH1184	japonica	0.0436978
CH1187	japonica	0.132551
CH1195	japonica	0.0641238
CH1196	japonica	0.15953
CH1206	japonica	0.125395
CH1223	japonica	0.273913
CH1240	japonica	0.195923
CH1248	japonica	0.275733
CH1250	japonica	0.16368
CH1257	japonica	0.193887
CH1266	japonica	0.326867
CH1274	japonica	0.582169
CH1281	japonica	0.128447
CH1288	japonica	0.763883
CH1289	japonica	0.414753
CH1291	japonica	0.116914
CH1305	japonica	0.152389
CX181	japonica	0.162604
CX333	japonica	0.105859
CH1015	indica	0.535718
CH1017	indica	0.809164
CH1029	indica	0.156942
CH1034	indica	0.374365
CH1044	indica	0.479197
CH1050	indica	0.282661
CH1057	indica	0.259904
CH1062	indica	0.666838
CH1063	indica	0.2713
CH1074	indica	0.176668
CH1079	indica	0.422635
CH1082	indica	0.247862
CH1093	indica	0.246633
CH1095	indica	0.467711
CH1100	indica	0.38672
CH1102	indica	0.952408
CH1104	indica	0.79649
CH1106	indica	0.451529
CH1107	indica	0.47842
CH1109	indica	0.185992
CH1110	indica	0.452132
CH1111	indica	0.461943
CH1112	indica	0.267317
CH1114	indica	0.857621
CH1115	indica	0.694469
CH1126	indica	0.435345
CH1130	indica	0.124509
CH1131	indica	0.215872
CH1132	indica	0.333461
CH1141	indica	0.435108
CH1146	indica	0.622146
CH1147	indica	0.319366
CH1149	indica	0.280181
CH1155	indica	0.11215
CH1156	indica	0.583745
CH1157	indica	0.279671
CH1158	indica	0.382665
CH1159	indica	0.671188
CH1164	indica	0.354889
CH1166	indica	0.235668
CH1167	indica	0.260125
CH1168	indica	0.0379638
CH1171	indica	0.180577
CH1173	indica	0.397244
CH1178	indica	0.229812
CH1186	indica	0.377321
CH1194	indica	0.19493
CH1197	indica	0.1706
CH1203	indica	0.675466
CH1204	indica	0.611883
CH1209	indica	0.476568
CH1210	indica	0.554284
CH1217	indica	1.31579
CH1219	indica	0.645302
CH1220	indica	0.972621
CH1225	indica	0.205224
CH1227	indica	0.752785
CH1228	indica	0.624907
CH1230	indica	0.183116
CH1232	indica	0.17845
CH1234	indica	0.486339
CH1243	indica	0.267472
CH1245	indica	0.405754
CH1247	indica	1.01618
CH1251	indica	0.126878
CH1252	indica	0.478061
CH1253	indica	0.230744
CH1255	indica	0.249512
CH1256	indica	0.351084
CH1258	indica	0.396367
CH1262	indica	0.315649
CH1263	indica	0.27688
CH1265	indica	0.448643
CH1271	indica	1.02825
CH1272	indica	0.258284
CH1273	indica	0.357857
CH1276	indica	0.375872
CH1277	indica	0.473388
CH1278	indica	0.307055
CH1284	indica	0.312179
CH1285	indica	0.159946
CH1286	indica	0.47363
CH1294	indica	0.372265
CH1295	indica	0.0925998
CX158	indica	0.537366
CX198	indica	0.381398
