# Supplementary material for: Natural Variation OsCd1<sup>V449</sup> Contributes to Reducing Cadmium Accumulation in Rice Grain
Source: Preprints.org preprint supplement (doi:10.20944/preprints201802.0075.v1), 2018-02-09
Supplement: Supplementary file 2 [file Table S10.xlsx]

## Sheet: Table S10
Supplementary Table 10 The SNP22 in 950 rice cultivars
Taxa	subpopulation	SNP22		Taxa	subpopulation	SNP22		Population	Population Size	Frequency of base A	Frequency of base T
HP387	indica	T		GP285	aus	A		japonica	484	0	1
GP639	indica	T		GP625	aus	A		indica	520	0.99	0.01
HP223	intermedia	T		GP713	aus	A		intermedia	44	0.5	0.5
GP613	intermedia	T		GP715	aus	A		aus	30	0.962	0.038
GP616	intermedia	T		HP26	indica	A
GP617	intermedia	T		HP42	indica	A
GP637	intermedia	T		HP61	indica	A
GP681	intermedia	T		HP71	indica	A
HP1	temperate japonica	T		HP119	indica	A
HP5	temperate japonica	T		HP143	indica	A
HP8	temperate japonica	T		HP149	indica	A
HP11	temperate japonica	T		HP176	indica	A
HP15	temperate japonica	T		HP179	indica	A
HP16	temperate japonica	T		HP182	indica	A
HP17	temperate japonica	T		HP184	indica	A
HP19	temperate japonica	T		HP187	indica	A
HP20	temperate japonica	T		HP188	indica	A
HP23	temperate japonica	T		HP190	indica	A
HP24	temperate japonica	T		HP192	indica	A
HP25	temperate japonica	T		HP193	indica	A
HP30	temperate japonica	T		HP194	indica	A
HP32	temperate japonica	T		HP195	indica	A
HP33	temperate japonica	T		HP196	indica	A
HP35	temperate japonica	T		HP197	indica	A
HP36	temperate japonica	T		HP198	indica	A
HP37	temperate japonica	T		HP199	indica	A
HP38	temperate japonica	T		HP200	indica	A
HP40	temperate japonica	T		HP201	indica	A
HP43	temperate japonica	T		HP204	indica	A
HP46	temperate japonica	T		HP205	indica	A
HP48	temperate japonica	T		HP207	indica	A
HP49	temperate japonica	T		HP210	indica	A
HP51	temperate japonica	T		HP211	indica	A
HP53	temperate japonica	T		HP212	indica	A
HP54	temperate japonica	T		HP216	indica	A
HP56	temperate japonica	T		HP217	indica	A
HP57	temperate japonica	T		HP218	indica	A
HP59	temperate japonica	T		HP219	indica	A
HP60	temperate japonica	T		HP220	indica	A
HP62	temperate japonica	T		HP224	indica	A
HP66	temperate japonica	T		HP226	indica	A
HP67	temperate japonica	T		HP227	indica	A
HP72	temperate japonica	T		HP228	indica	A
HP74	temperate japonica	T		HP229	indica	A
HP77	temperate japonica	T		HP230	indica	A
HP84	temperate japonica	T		HP231	indica	A
HP88	temperate japonica	T		HP232	indica	A
HP91	temperate japonica	T		HP233	indica	A
HP93	temperate japonica	T		HP234	indica	A
HP95	temperate japonica	T		HP235	indica	A
HP98	temperate japonica	T		HP236	indica	A
HP99	temperate japonica	T		HP237	indica	A
HP104	temperate japonica	T		HP239	indica	A
HP106	temperate japonica	T		HP240	indica	A
HP108	temperate japonica	T		HP242	indica	A
HP109	temperate japonica	T		HP244	indica	A
HP110	temperate japonica	T		HP246	indica	A
HP111	temperate japonica	T		HP248	indica	A
HP112	temperate japonica	T		HP249	indica	A
HP113	temperate japonica	T		HP250	indica	A
HP114	temperate japonica	T		HP251	indica	A
HP122	temperate japonica	T		HP252	indica	A
HP123	temperate japonica	T		HP253	indica	A
HP124	temperate japonica	T		HP254	indica	A
HP125	temperate japonica	T		HP255	indica	A
HP127	temperate japonica	T		HP259	indica	A
HP128	temperate japonica	T		HP260	indica	A
HP130	temperate japonica	T		HP261	indica	A
HP131	temperate japonica	T		HP262	indica	A
HP132	temperate japonica	T		HP264	indica	A
HP133	temperate japonica	T		HP267	indica	A
HP134	temperate japonica	T		HP268	indica	A
HP135	temperate japonica	T		HP269	indica	A
HP138	temperate japonica	T		HP274	indica	A
HP139	temperate japonica	T		HP277	indica	A
HP140	temperate japonica	T		HP279	indica	A
HP142	temperate japonica	T		HP287	indica	A
HP146	temperate japonica	T		HP288	indica	A
HP147	temperate japonica	T		HP295	indica	A
HP148	temperate japonica	T		HP296	indica	A
HP150	temperate japonica	T		HP297	indica	A
HP154	temperate japonica	T		HP298	indica	A
HP156	temperate japonica	T		HP299	indica	A
HP157	temperate japonica	T		HP300	indica	A
HP158	temperate japonica	T		HP302	indica	A
HP160	temperate japonica	T		HP304	indica	A
HP162	temperate japonica	T		HP305	indica	A
HP166	temperate japonica	T		HP306	indica	A
HP241	temperate japonica	T		HP307	indica	A
HP256	temperate japonica	T		HP310	indica	A
HP271	temperate japonica	T		HP311	indica	A
HP272	temperate japonica	T		HP312	indica	A
HP280	temperate japonica	T		HP313	indica	A
HP282	temperate japonica	T		HP317	indica	A
HP283	temperate japonica	T		HP318	indica	A
HP308	temperate japonica	T		HP319	indica	A
HP309	temperate japonica	T		HP320	indica	A
HP314	temperate japonica	T		HP321	indica	A
HP363	temperate japonica	T		HP322	indica	A
HP372	temperate japonica	T		HP324	indica	A
HP375	temperate japonica	T		HP325	indica	A
HP385	temperate japonica	T		HP326	indica	A
HP388	temperate japonica	T		HP329	indica	A
HP390	temperate japonica	T		HP333	indica	A
HP404	temperate japonica	T		HP334	indica	A
HP421	temperate japonica	T		HP335	indica	A
HP425	temperate japonica	T		HP337	indica	A
HP439	temperate japonica	T		HP338	indica	A
HP454	temperate japonica	T		HP340	indica	A
HP462	temperate japonica	T		HP342	indica	A
HP466	temperate japonica	T		HP343	indica	A
HP468	temperate japonica	T		HP344	indica	A
HP512	temperate japonica	T		HP347	indica	A
HP532	temperate japonica	T		HP348	indica	A
HP554	temperate japonica	T		HP350	indica	A
HP564	temperate japonica	T		HP351	indica	A
HP568	temperate japonica	T		HP353	indica	A
HP574	temperate japonica	T		HP355	indica	A
HP585	temperate japonica	T		HP356	indica	A
HP588	temperate japonica	T		HP357	indica	A
HP596	temperate japonica	T		HP366	indica	A
HP599	temperate japonica	T		HP367	indica	A
HP605	temperate japonica	T		HP374	indica	A
HP990	temperate japonica	T		HP380	indica	A
HP996	temperate japonica	T		HP386	indica	A
GP498	temperate japonica	T		HP399	indica	A
GP502	temperate japonica	T		HP400	indica	A
GP504	temperate japonica	T		HP408	indica	A
GP505	temperate japonica	T		HP409	indica	A
GP508	temperate japonica	T		HP410	indica	A
GP552	temperate japonica	T		HP411	indica	A
GP570	temperate japonica	T		HP412	indica	A
GP595	temperate japonica	T		HP413	indica	A
GP596	temperate japonica	T		HP414	indica	A
GP597	temperate japonica	T		HP416	indica	A
GP599	temperate japonica	T		HP418	indica	A
GP601	temperate japonica	T		HP420	indica	A
GP603	temperate japonica	T		HP423	indica	A
GP605	temperate japonica	T		HP427	indica	A
GP606	temperate japonica	T		HP429	indica	A
GP607	temperate japonica	T		HP430	indica	A
GP612	temperate japonica	T		HP431	indica	A
GP619	temperate japonica	T		HP432	indica	A
GP620	temperate japonica	T		HP438	indica	A
GP621	temperate japonica	T		HP440	indica	A
GP630	temperate japonica	T		HP441	indica	A
GP636	temperate japonica	T		HP442	indica	A
GP646	temperate japonica	T		HP443	indica	A
GP648	temperate japonica	T		HP444	indica	A
GP649	temperate japonica	T		HP447	indica	A
GP653	temperate japonica	T		HP449	indica	A
GP654	temperate japonica	T		HP450	indica	A
GP655	temperate japonica	T		HP452	indica	A
GP656	temperate japonica	T		HP453	indica	A
GP657	temperate japonica	T		HP455	indica	A
GP660	temperate japonica	T		HP456	indica	A
GP662	temperate japonica	T		HP457	indica	A
GP663	temperate japonica	T		HP458	indica	A
GP668	temperate japonica	T		HP460	indica	A
GP670	temperate japonica	T		HP463	indica	A
GP671	temperate japonica	T		HP464	indica	A
GP674	temperate japonica	T		HP469	indica	A
GP675	temperate japonica	T		HP471	indica	A
GP677	temperate japonica	T		HP472	indica	A
GP678	temperate japonica	T		HP474	indica	A
GP680	temperate japonica	T		HP477	indica	A
GP685	temperate japonica	T		HP478	indica	A
GP692	temperate japonica	T		HP479	indica	A
GP694	temperate japonica	T		HP480	indica	A
GP703	temperate japonica	T		HP481	indica	A
GP707	temperate japonica	T		HP482	indica	A
GP708	temperate japonica	T		HP485	indica	A
GP710	temperate japonica	T		HP486	indica	A
GP750	temperate japonica	T		HP487	indica	A
GP800	temperate japonica	T		HP488	indica	A
GP537	tropical japonica	T		HP489	indica	A
GP626	tropical japonica	T		HP491	indica	A
GP629	tropical japonica	T		HP493	indica	A
GP641	tropical japonica	T		HP496	indica	A
GP642	tropical japonica	T		HP498	indica	A
GP647	tropical japonica	T		HP499	indica	A
GP679	tropical japonica	T		HP500	indica	A
GP683	tropical japonica	T		HP502	indica	A
GP686	tropical japonica	T		HP503	indica	A
GP695	tropical japonica	T		HP505	indica	A
GP697	tropical japonica	T		HP506	indica	A
GP698	tropical japonica	T		HP507	indica	A
GP699	tropical japonica	T		HP509	indica	A
GP701	tropical japonica	T		HP510	indica	A
GP705	tropical japonica	T		HP517	indica	A
GP706	tropical japonica	T		HP520	indica	A
GP712	tropical japonica	T		HP521	indica	A
GP714	tropical japonica	T		HP522	indica	A
				HP523	indica	A
				HP524	indica	A
				HP526	indica	A
				HP528	indica	A
				HP529	indica	A
				HP530	indica	A
				HP534	indica	A
				HP535	indica	A
				HP536	indica	A
				HP537	indica	A
				HP539	indica	A
				HP542	indica	A
				HP543	indica	A
				HP544	indica	A
				HP549	indica	A
				HP551	indica	A
				HP553	indica	A
				HP555	indica	A
				HP556	indica	A
				HP557	indica	A
				HP558	indica	A
				HP563	indica	A
				HP565	indica	A
				HP567	indica	A
				HP570	indica	A
				HP571	indica	A
				HP572	indica	A
				HP573	indica	A
				HP575	indica	A
				HP576	indica	A
				HP577	indica	A
				HP580	indica	A
				HP581	indica	A
				HP583	indica	A
				HP592	indica	A
				HP593	indica	A
				HP598	indica	A
				HP600	indica	A
				HP603	indica	A
				HP606	indica	A
				HP608	indica	A
				HP609	indica	A
				HP610	indica	A
				HP611	indica	A
				HP612	indica	A
				HP613	indica	A
				HP991	indica	A
				HP998	indica	A
				HP999	indica	A
				GP52	indica	A
				GP108	indica	A
				GP118	indica	A
				GP140	indica	A
				GP142	indica	A
				GP624	indica	A
				GP676	indica	A
				HP41	intermedia	A
				HP63	intermedia	A
				HP294	intermedia	A
				GP543	intermedia	A
				GP615	intermedia	A
