# Supplementary material for: Natural Variation OsCd1<sup>V449</sup> Contributes to Reducing Cadmium Accumulation in Rice Grain
Source: Preprints.org preprint supplement (doi:10.20944/preprints201802.0075.v1), 2018-02-09
Supplement: Supplementary file 3 [file Table S12.xlsx]

## Sheet: Table S12
Supplementary Table 12 The level of population differentiation (Fst)
		or-I vs or-III	or-III vs jap	or-I vs ind	ind vs jap
	average_Fst	0.0591628	0.0205351	0.0401117	0.106549
chromosome	position	or-I vs or-III	or-III vs jap	or-I vs ind	ind vs jap
Chr3	836400	0	0	0	0.491758
Chr3	836500	0.0127935	0	0.0163496	0.0983516
Chr3	836600	0.0291437	0.000223122	0.0311492	0.121727
Chr3	836700	0.0297056	0.000167342	0.0492781	0.128747
Chr3	836800	0.024619	0.000133873	0.0413143	0.105339
Chr3	836900	0.0232212	0.00010298	0.0379594	0.0827661
Chr3	837000	0.0225878	9.56239e-05	0.0367482	0.0772484
Chr3	837100	0.0225878	9.56239e-05	0.0367482	0.0772484
Chr3	837200	0.0216255	8.9249e-05	0.0351149	0.0724203
Chr3	837300	0.0535367	0.00179511	0.0327959	0.108448
Chr3	837400	0.0535367	0.00179511	0.0345219	0.0882742
Chr3	837500	0.0571006	0.00213686	0.0341132	0.0988293
Chr3	837600	0.0502913	0.0022658	0.0267007	0.0779236
Chr3	837700	0.04704	0.0022658	0.0140244	0.059886
Chr3	837800	0.0448297	0.00271264	0.0142275	0.0570022
Chr3	837900	0.0456787	0.00287221	0.0125503	0.0603552
Chr3	838000	0.0763989	0.00353787	0.0201098	0.0956853
Chr3	838100	0.0800977	0.0151189	0.0211491	0.125004
Chr3	838200	0.0988105	0.0159908	0.0202687	0.152785
Chr3	838300	0.0837245	0.0166696	0.0287831	0.144655
Chr3	838400	0.0794421	0.0154349	0.034477	0.146279
Chr3	838500	0.0830056	0.0153825	0.0373729	0.157346
Chr3	838600	0.0864262	0.0165572	0.0384147	0.163208
Chr3	838700	0.10469	0.0180575	0.0401019	0.180196
Chr3	838800	0.106681	0.0177515	0.0424932	0.179922
Chr3	838900	0.108603	0.029047	0.0411457	0.202017
Chr3	839000	0.0966362	0.0338377	0.0402252	0.203086
Chr3	839100	0.0914006	0.0242341	0.0402691	0.177672
Chr3	839200	0.0694284	0.0262497	0.0475349	0.156032
Chr3	839300	0.071887	0.0447657	0.0343606	0.17338
Chr3	839400	0.0755287	0.0535355	0.0238026	0.148053
Chr3	839500	0.0715262	0.0534952	0.0210619	0.132968
Chr3	839600	0.0625532	0.047296	0.0200311	0.115624
Chr3	839700	0.0326726	0.0497859	0.0274469	0.100944
Chr3	839800	0.0303342	0.0502746	0.0237652	0.100942
Chr3	839900	0.0221522	0.0341512	0.0233787	0.061898
Chr3	840000	0.0200761	0.0303705	0.0206335	0.0534574
Chr3	840100	0.0184916	0.0258264	0.0195573	0.0454443
Chr3	840200	0.0181144	0.0248698	0.0192462	0.0437612
Chr3	840300	0.0132367	0.0111454	0.0168404	0.0119747
Chr3	840400	0.032291	0.00377241	0.0202414	0.0465312
Chr3	840500	0.0329297	0.00391213	0.0201795	0.0482546
Chr3	840600	0.0348468	0.003614	0.0207197	0.0523978
Chr3	840700	0.0380631	0.00542173	0.0106516	0.0405594
Chr3	840800	0.0372855	0.00495469	0.0100165	0.0405594
Chr3	840900	0.0461664	0.0204861	0.015593	0.0781284
Chr3	841000	0.0492773	0.0214294	0.0165254	0.0849222
Chr3	841100	0.0583841	0.0236413	0.0217514	0.112616
Chr3	841200	0.0557979	0.022675	0.0207528	0.107649
Chr3	841300	0.0637407	0.0233649	0.0269346	0.118414
Chr3	841400	0.0293677	0.0244592	0.0224108	0.0743514
Chr3	841500	0.0290651	0.0245962	0.0284175	0.0814193
Chr3	841600	0.0309399	0.0247602	0.0299238	0.0851368
Chr3	841700	0.039774	0.0419801	0.032614	0.134874
Chr3	841800	0.0437418	0.0466445	0.0498738	0.170827
Chr3	841900	0.0349471	0.0297574	0.0495403	0.139674
Chr3	842000	0.0345779	0.0278976	0.0486499	0.130944
Chr3	842100	0.0361022	0.0405513	0.0448113	0.111859
Chr3	842200	0.0409029	0.0466066	0.0508638	0.128811
Chr3	842300	0.0388786	0.0504905	0.0484937	0.139545
Chr3	842400	0.0388787	0.0510095	0.0489779	0.139545
Chr3	842500	0.0453734	0.0622575	0.0455062	0.153046
Chr3	842600	0.110323	0.0557301	0.0434606	0.23706
Chr3	842700	0.161519	0.0199992	0.0492748	0.270383
Chr3	842800	0.15274	0.0185707	0.0313392	0.224112
Chr3	842900	0.143868	0.0173327	0.0310794	0.209171
Chr3	843000	0.13498	0.0165995	0.0296055	0.196586
Chr3	843100	0.120623	0.0056916	0.0273566	0.185022
Chr3	843200	0.106131	0.00483786	0.0282433	0.157269
Chr3	843300	0.106091	0.00444809	0.0337489	0.163851
Chr3	843400	0.110913	0.0043672	0.0350189	0.171299
Chr3	843500	0.106091	0.00417733	0.0334963	0.163851
Chr3	843600	0.0729204	0.00281975	0.0320942	0.110362
Chr3	843700	0.0275842	0.00155423	0.0261163	0.0300485
Chr3	843800	0.0270323	0.00163194	0.0247854	0.0315509
Chr3	843900	0.0245884	0.00177701	0.0227635	0.0286826
Chr3	844000	0.0262329	0.00263279	0.0229003	0.0311604
Chr3	844100	0.0285515	0.00292532	0.0245431	0.0346226
Chr3	844200	0.0286568	0.00329099	0.0222531	0.0390868
Chr3	844300	0.0687211	0.00446979	0.0144712	0.0753086
Chr3	844400	0.0614693	0.00471059	0.0143275	0.0653751
Chr3	844500	0.0603295	0.00451379	0.021639	0.0576839
Chr3	844600	0.0666077	0.00368305	0.0235888	0.0653751
Chr3	844700	0.0716071	0.0165629	0.0331925	0.0820358
Chr3	844800	0.0723486	0.0165629	0.034208	0.0820358
Chr3	844900	0.0776287	0.0171946	0.0370262	0.087163
Chr3	845000	0.081843	0.0170634	0.0394946	0.0929739
Chr3	845100	0.0794295	0.015997	0.0406739	0.087163
Chr3	845200	0.134464	0.0455267	0.0410865	0.18695
Chr3	845300	0.0846199	0.0405273	0.0363634	0.11955
Chr3	845400	0.0762052	0.0383481	0.0329542	0.109111
Chr3	845500	0.0754481	0.0398848	0.0279711	0.114307
Chr3	845600	0.0718208	0.0389163	0.0263422	0.109179
Chr3	845700	0.0671691	0.0315367	0.0171995	0.099401
Chr3	845800	0.0700409	0.0331965	0.0171961	0.104633
Chr3	845900	0.0721495	0.0350963	0.0157395	0.110532
Chr3	846000	0.0701235	0.0315883	0.0194074	0.115802
Chr3	846100	0.0613353	0.0278694	0.0181983	0.100701
Chr3	846200	0.0290742	0.00360079	0.0160162	0.047747
Chr3	846300	0.0277887	0.00350692	0.0144456	0.0476232
Chr3	846400	0.0333783	0.00758595	0.014363	0.0493663
Chr3	846500	0.039699	0.00796964	0.0151641	0.0606982
Chr3	846600	0.0657699	0.00979538	0.0166167	0.104456
Chr3	846700	0.0704077	0.00934624	0.0168295	0.113939
Chr3	846800	0.0650366	0.00922424	0.015427	0.104444
Chr3	846900	0.0833902	0.0105081	0.0199963	0.133697
Chr3	847000	0.0804887	0.0106548	0.0233868	0.13273
Chr3	847100	0.0888736	0.0116432	0.0227329	0.150039
Chr3	847200	0.0702176	0.0110852	0.0221904	0.114329
Chr3	847300	0.0764013	0.0120929	0.023922	0.124723
Chr3	847400	0.0760556	0.0065823	0.025857	0.13066
Chr3	847500	0.0719007	0.00657811	0.0261014	0.122219
Chr3	847600	0.0467881	0.00846077	0.030452	0.0862982
Chr3	847700	0.0430768	0.0092662	0.0323581	0.0792708
Chr3	847800	0.0472015	0.00941997	0.0359535	0.0880787
Chr3	847900	0.0161574	0.00778203	0.0331671	0.0409583
Chr3	848000	0.0164632	0.00868339	0.0234246	0.0240825
Chr3	848100	0.0187837	0.0102622	0.0268133	0.0284612
Chr3	848200	0.0213126	0.0141105	0.0310729	0.0391341
Chr3	848300	0.0466638	0.0125427	0.0283277	0.0655075
Chr3	848400	0.0607128	0.0141105	0.0410444	0.073696
Chr3	848500	0.0469343	0.0129701	0.0306634	0.0535971
Chr3	848600	0.0942746	0.0362958	0.0245848	0.158283
Chr3	848700	0.0942746	0.0362958	0.0245848	0.158283
Chr3	848800	0.113624	0.0365009	0.0319689	0.155192
Chr3	848900	0.113624	0.0365009	0.0319689	0.155192
Chr3	849000	0.109817	0.0338798	0.0444931	0.172053
Chr3	849100	0.101233	0.0468769	0.0414537	0.194099
Chr3	849200	0.101233	0.0468769	0.0414537	0.194099
Chr3	849300	0.0969874	0.0546897	0.0473978	0.203407
Chr3	849400	0.0854213	0.0504854	0.046113	0.201488
Chr3	849500	0.111428	0.0524815	0.0627101	0.271975
Chr3	849600	0.0687715	0.025608	0.0531259	0.162955
Chr3	849700	0.0646898	0.0250175	0.0493312	0.151315
Chr3	849800	0.0482074	0.0419555	0.0494186	0.192369
Chr3	849900	0.0482074	0.0419555	0.0494186	0.192369
Chr3	850000	0.0468922	0.044416	0.0405625	0.181359
Chr3	850100	0.0430312	0.0266049	0.042842	0.129227
Chr3	850200	0.0430312	0.0266049	0.042842	0.129227
Chr3	850300	0.0469897	0.0484257	0.0440391	0.144677
Chr3	850400	0.0511835	0.0548802	0.0413013	0.15207
Chr3	850500	0.0411061	0.068329	0.0362818	0.136391
Chr3	850600	0.0526199	0.0911053	0.0463463	0.181548
Chr3	850700	0.0577439	0.100326	0.0521396	0.204242
Chr3	850800	0.0936196	0.110109	0.0546341	0.153877
Chr3	850900	0.0716711	0.0770792	0.0461305	0.110477
Chr3	851000	0.0574197	0.0598457	0.0393236	0.0849863
Chr3	851100	0.0612934	0.0698943	0.0365926	0.100438
Chr3	851200	0.0600786	0.0640698	0.0383509	0.0920685
Chr3	851300	0.0475304	0.0266209	0.0673863	0.0959439
Chr3	851400	0.0520404	0.0236468	0.0602575	0.106423
Chr3	851500	0.0545816	0.029128	0.0676407	0.108778
Chr3	851600	0.0528576	0.02648	0.0655032	0.0988887
Chr3	851700	0.0593785	0.0233818	0.0685285	0.103519
Chr3	851800	0.0465463	0.0100226	0.0689744	0.0864874
Chr3	851900	0.0509765	0.00958558	0.0739366	0.0815259
Chr3	852000	0.0571159	0.00969389	0.0816429	0.0852291
Chr3	852100	0.0561991	0.0110884	0.0926223	0.0857151
Chr3	852200	0.0508799	0.0102014	0.084412	0.0790898
Chr3	852300	0.0616471	0.0103527	0.0687923	0.0679753
Chr3	852400	0.057673	0.0101809	0.0706011	0.0515318
Chr3	852500	0.0541374	0.00287714	0.0629103	0.0376976
Chr3	852600	0.0544334	0.00308664	0.0732122	0.056011
Chr3	852700	0.0464564	0.00313915	0.0696634	0.0390384
Chr3	852800	0.0428254	0.00263688	0.063268	0.0327923
Chr3	852900	0.0415239	0.00299646	0.0630763	0.037264
Chr3	853000	0.0463534	0.00498306	0.0589496	0.0416664
Chr3	853100	0.0479145	0.015297	0.043619	0.0651135
Chr3	853200	0.0527924	0.0174293	0.055089	0.0935207
Chr3	853300	0.0405005	0.0200276	0.0646306	0.0857104
Chr3	853400	0.0382736	0.0214532	0.0642669	0.0942814
Chr3	853500	0.0392913	0.0198027	0.0658329	0.0857104
Chr3	853600	0.0391173	0.014963	0.0545887	0.0526258
Chr3	853700	0.0372124	0.0154974	0.0524491	0.0545053
Chr3	853800	0.0393264	0.0149996	0.0555427	0.0526287
Chr3	853900	0.0414715	0.0141681	0.060595	0.0727601
Chr3	854000	0.0344818	0.0128245	0.0590338	0.0696438
Chr3	854100	0.0331538	0.00378625	0.0616687	0.0493867
Chr3	854200	0.033442	0.00223191	0.0571779	0.0280212
Chr3	854300	0.0358817	0.000788757	0.0500247	0.0251218
Chr3	854400	0.0450406	0.00138263	0.0502683	0.0363692
Chr3	854500	0.0548951	0.00285906	0.0556286	0.0687684
Chr3	854600	0.0583836	0.00388558	0.0573106	0.0895384
Chr3	854700	0.0588802	0.00374167	0.0586738	0.0862222
Chr3	854800	0.0625779	0.00434623	0.0601308	0.101214
Chr3	854900	0.0553191	0.00416264	0.0473894	0.0695036
Chr3	855000	0.0617376	0.00426177	0.0524823	0.0891891
Chr3	855100	0.0670197	0.0155093	0.0521619	0.120708
Chr3	855200	0.0696584	0.0295784	0.0585773	0.160228
Chr3	855300	0.0716536	0.0339815	0.0566998	0.168235
Chr3	855400	0.059814	0.0366138	0.0576112	0.164141
Chr3	855500	0.0529564	0.0357989	0.0591206	0.155407
Chr3	855600	0.0560692	0.037512	0.0601825	0.160763
Chr3	855700	0.0563499	0.0398565	0.059642	0.170811
Chr3	855800	0.06822	0.0426644	0.0615142	0.180044
Chr3	855900	0.0780442	0.0487593	0.0698096	0.205764
Chr3	856000	0.0784656	0.0565249	0.0711567	0.202307
Chr3	856100	0.0755285	0.0395558	0.0761913	0.165768
Chr3	856200	0.0772718	0.0169734	0.0654195	0.121784
Chr3	856300	0.0734789	0.0102936	0.0861106	0.152362
Chr3	856400	0.082079	0.0250832	0.0860057	0.152362
Chr3	856500	0.0605805	0.0261113	0.054047	0.0615122
Chr3	856600	0.0793888	0.0353089	0.0601254	0.0734762
Chr3	856700	0.0735752	0.0282471	0.0724916	0.111822
Chr3	856800	0.0677761	0.0318399	0.0709051	0.113732
Chr3	856900	0.0582191	0.0269967	0.0582	0.0993503
Chr3	857000	0.0544152	0.0249201	0.0546123	0.0917079
Chr3	857100	0.0705876	0.0238914	0.0498922	0.120578
Chr3	857200	0.0854244	0.0252899	0.0473209	0.147431
Chr3	857300	0.0856273	0.0239856	0.0487724	0.14184
Chr3	857400	0.0723096	0.0169492	0.0473938	0.116718
Chr3	857500	0.0807666	0.0178884	0.0522298	0.139511
Chr3	857600	0.0780846	0.0133049	0.0449442	0.140744
Chr3	857700	0.0823714	0.0144007	0.0421119	0.144655
Chr3	857800	0.0825174	0.011908	0.0397616	0.152243
Chr3	857900	0.0814046	0.0118549	0.0398576	0.150497
Chr3	858000	0.0840948	0.012294	0.0409057	0.156071
Chr3	858100	0.0800157	0.0120732	0.0440485	0.136459
Chr3	858200	0.0706809	0.0101768	0.0453294	0.119469
Chr3	858300	0.0720754	0.0116061	0.037251	0.12058
Chr3	858400	0.0761185	0.0101648	0.0358361	0.131549
Chr3	858500	0.0701891	0.00890666	0.0345092	0.110059
Chr3	858600	0.0567404	0.00743045	0.0388779	0.0789014
Chr3	858700	0.0550784	0.00777739	0.0340841	0.0619201
Chr3	858800	0.0413382	0.00650604	0.0348532	0.0247772
Chr3	858900	0.0499087	0.00653623	0.0427734	0.0548002
Chr3	859000	0.0453822	0.00531069	0.0409793	0.0445252
Chr3	859100	0.034631	0.00403732	0.0380279	0.0446763
Chr3	859200	0.0312129	0.00393735	0.0340555	0.0390917
Chr3	859300	0.0291646	0.00247038	0.0349621	0.0264185
Chr3	859400	0.0406782	0.00997701	0.0345179	0.0341703
Chr3	859500	0.0367181	0.00874381	0.0298005	0.0301013
Chr3	859600	0.0378101	0.00874381	0.0317655	0.0301013
Chr3	859700	0.0369614	0.0080725	0.0329923	0.0254383
Chr3	859800	0.0378116	0.00681951	0.0321505	0.0241769
Chr3	859900	0.0370322	0.00864817	0.0322123	0.0138585
Chr3	860000	0.0377453	0.00864817	0.0402095	0.0283746
Chr3	860100	0.040159	0.00798293	0.0440625	0.026192
Chr3	860200	0.0422759	0.00778256	0.0455384	0.0268071
Chr3	860300	0.0410872	0.00749432	0.0443496	0.0258142
Chr3	860400	0.0352294	0.00427683	0.0465252	0.0270486
Chr3	860500	0.0341848	0.00543007	0.0460442	0.0325208
Chr3	860600	0.0349157	0.00761787	0.0454316	0.0380686
