# Supplementary material for: Natural Variation OsCd1<sup>V449</sup> Contributes to Reducing Cadmium Accumulation in Rice Grain
Source: Preprints.org preprint supplement (doi:10.20944/preprints201802.0075.v1), 2018-02-09
Supplement: Supplementary file 4 [file Table S3.xlsx]

## Sheet: Table S3
Supplementary Table 3. The annotated genes in the 12 QTLs
Locus	Chromosome	Start	Stop	Annotation
LOC_Os02g12840	chr2	6756894	7048723	DEAD-box ATP-dependent RNA helicase, putative, expressed
LOC_Os02g12850	chr2	6756894	7048723	RNA recognition motif containing protein, expressed
LOC_Os02g12860	chr2	6756894	7048723	expressed protein
LOC_Os02g12870	chr2	6756894	7048723	expressed protein
LOC_Os02g12880	chr2	6756894	7048723	calcium-binding EF hand family protein, putative, expressed
LOC_Os02g12890	chr2	6756894	7048723	cytochrome P450, putative, expressed
LOC_Os02g12900	chr2	6756894	7048723	cysteine synthase, putative, expressed
LOC_Os02g12910	chr2	6756894	7048723	receptor-like protein kinase 5 precursor, putative, expressed
LOC_Os02g12930	chr2	6756894	7048723	expressed protein
LOC_Os02g12939	chr2	6756894	7048723	expressed protein
LOC_Os02g12950	chr2	6756894	7048723	hypothetical protein
LOC_Os02g12960	chr2	6756894	7048723	expressed protein
LOC_Os02g12970	chr2	6756894	7048723	retrotransposon protein, putative, Ty3-gypsy subclass, expressed
LOC_Os02g12980	chr2	6756894	7048723	retrotransposon protein, putative, unclassified, expressed
LOC_Os02g12990	chr2	6756894	7048723	retrotransposon protein, putative, unclassified, expressed
LOC_Os02g13000	chr2	6756894	7048723	retrotransposon protein, putative, unclassified, expressed
LOC_Os02g13010	chr2	6756894	7048723	retrotransposon protein, putative, unclassified, expressed
LOC_Os02g13020	chr2	6756894	7048723	expressed protein
LOC_Os02g13030	chr2	6756894	7048723	expressed protein
LOC_Os02g13040	chr2	6756894	7048723	retrotransposon protein, putative, unclassified, expressed
LOC_Os02g13060	chr2	6756894	7048723	expressed protein
LOC_Os02g13070	chr2	6756894	7048723	hypothetical protein
LOC_Os02g13080	chr2	6756894	7048723	expressed protein
LOC_Os02g13090	chr2	6756894	7048723	expressed protein
LOC_Os02g13100	chr2	6756894	7048723	protein phosphatase 2C, putative, expressed
LOC_Os02g13110	chr2	6756894	7048723	serine/threonine protein phosphatase 2A 55 kDa regulatory subunit B, putative, expressed
LOC_Os02g13120	chr2	6756894	7048723	expressed protein
LOC_Os02g13130	chr2	6756894	7048723	KH domain-containing protein, putative, expressed
LOC_Os02g13140	chr2	6756894	7048723	xaa-Pro dipeptidase, putative, expressed
LOC_Os02g13150	chr2	6756894	7048723	pollen-specific protein SF21, putative, expressed
LOC_Os02g13160	chr2	6756894	7048723	F-box protein PP2-A15, putative, expressed
LOC_Os02g13170	chr2	6756894	7048723	mitochondrial carrier protein, putative, expressed
LOC_Os02g13180	chr2	6756894	7048723	SKP1, putative, expressed
LOC_Os02g13190	chr2	6756894	7048723	F-box family protein, putative, expressed
LOC_Os02g13200	chr2	6756894	7048723	expressed protein
LOC_Os02g13210	chr2	6756894	7048723	transposable element protein, putative, containing Pfam profile: PF03004, Transposase_24, expressed
LOC_Os02g13220	chr2	6756894	7048723	F-box family protein, putative, expressed
LOC_Os02g15790	chr2	8915797	8951020	expressed protein
LOC_Os02g15800	chr2	8915797	8951020	expressed protein
LOC_Os02g15810	chr2	8915797	8951020	HMG1/2, putative, expressed
LOC_Os02g15820	chr2	8915797	8951020	extra-large G-protein-related, putative, expressed
LOC_Os02g15830	chr2	8915797	8951020	expressed protein
LOC_Os03g01870	chr3	519263	995454	no apical meristem protein, putative, expressed
LOC_Os03g01880	chr3	519263	995454	possible lysine decarboxylase domain containing protein, expressed
LOC_Os03g01890	chr3	519263	995454	START domain containing protein, expressed
LOC_Os03g01900	chr3	519263	995454	40S ribosomal protein S17, putative, expressed
LOC_Os03g01910	chr3	519263	995454	transcription factor BTF3, putative, expressed
LOC_Os03g01915	chr3	519263	995454	expressed protein
LOC_Os03g01920	chr3	519263	995454	expressed protein
LOC_Os03g01930	chr3	519263	995454	retrotransposon protein, putative, unclassified, expressed
LOC_Os03g01940	chr3	519263	995454	expressed protein
LOC_Os03g01950	chr3	519263	995454	transposon protein, putative, unclassified, expressed
LOC_Os03g01960	chr3	519263	995454	expressed protein
LOC_Os03g01970	chr3	519263	995454	THO complex subunit 1, putative, expressed
LOC_Os03g01980	chr3	519263	995454	KIP1, putative, expressed
LOC_Os03g01990	chr3	519263	995454	lysM domain containing protein, putative, expressed
LOC_Os03g02010	chr3	519263	995454	DNA methyltransferase protein, putative, expressed
LOC_Os03g02020	chr3	519263	995454	stress responsive A/B Barrel domain containing protein, expressed
LOC_Os03g02030	chr3	519263	995454	folylpolyglutamate synthase, mitochondrial precursor, putative, expressed
LOC_Os03g02040	chr3	519263	995454	remorin, putative, expressed
LOC_Os03g02050	chr3	519263	995454	LTPL151 - Protease inhibitor/seed storage/LTP family protein precursor, expressed
LOC_Os03g02060	chr3	519263	995454	hypothetical protein
LOC_Os03g02070	chr3	519263	995454	heavy-metal-associated domain-containing protein, putative, expressed
LOC_Os03g02080	chr3	519263	995454	expressed protein
LOC_Os03g02090	chr3	519263	995454	expressed protein
LOC_Os03g02100	chr3	519263	995454	valyl-tRNA synthetase, putative, expressed
LOC_Os03g02110	chr3	519263	995454	WD domain, G-beta repeat domain containing protein, expressed
LOC_Os03g02120	chr3	519263	995454	transposon protein, putative, Mariner sub-class, expressed
LOC_Os03g02130	chr3	519263	995454	hypothetical protein
LOC_Os03g02140	chr3	519263	995454	transposon protein, putative, unclassified, expressed
LOC_Os03g02150	chr3	519263	995454	adapitin protein, putative, expressed
LOC_Os03g02160	chr3	519263	995454	zinc finger C-x8-C-x5-C-x3-H type family protein, expressed
LOC_Os03g02170	chr3	519263	995454	transmembrane and coiled-coil domain-containing protein 4, putative, expressed
LOC_Os03g02180	chr3	519263	995454	cytochrome P450, putative, expressed
LOC_Os03g02190	chr3	519263	995454	protein kinase domain containing protein, expressed
LOC_Os03g02200	chr3	519263	995454	thymidine kinase, putative, expressed
LOC_Os03g02210	chr3	519263	995454	expressed protein
LOC_Os03g02230	chr3	519263	995454	expressed protein
LOC_Os03g02240	chr3	519263	995454	AT-GTL1, putative, expressed
LOC_Os03g02255	chr3	519263	995454	expressed protein
LOC_Os03g02260	chr3	519263	995454	DnaK family protein, putative, expressed
LOC_Os03g02270	chr3	519263	995454	expressed protein
LOC_Os03g02280	chr3	519263	995454	DUF584 domain containing protein, putative, expressed
LOC_Os03g02290	chr3	519263	995454	kinesin motor domain containing protein, putative, expressed
LOC_Os03g02300	chr3	519263	995454	expressed protein
LOC_Os03g02310	chr3	519263	995454	RNA binding protein, putative, expressed
LOC_Os03g02320	chr3	519263	995454	STE_PAK_Ste20_STLK.3 - STE kinases include homologs to sterile 7, sterile 11 and sterile 20 from yeast, expressed
LOC_Os03g02330	chr3	519263	995454	AAA-type ATPase family protein, putative, expressed
LOC_Os03g02340	chr3	519263	995454	expressed protein
LOC_Os03g02350	chr3	519263	995454	transposon protein, putative, unclassified, expressed
LOC_Os03g02360	chr3	519263	995454	retrotransposon protein, putative, unclassified, expressed
LOC_Os03g02370	chr3	519263	995454	transposon protein, putative, unclassified, expressed
LOC_Os03g02380	chr3	519263	995454	major facilitator superfamily domain-containing protein 5, putative, expressed
LOC_Os03g02390	chr3	519263	995454	mitochondrial import inner membrane translocase subunit Tim17, putative, expressed
LOC_Os03g02400	chr3	519263	995454	plastocyanin-like domain containing protein, putative, expressed
LOC_Os03g02410	chr3	519263	995454	GHMP kinases ATP-binding protein, putative, expressed
LOC_Os03g02420	chr3	519263	995454	KH domain containing protein, putative, expressed
LOC_Os03g02430	chr3	519263	995454	PPR repeat domain containing protein, putative, expressed
LOC_Os03g02440	chr3	519263	995454	WD repeat-containing protein 44, putative, expressed
LOC_Os03g02450	chr3	519263	995454	pyridoxamine 5'-phosphate oxidase family protein, putative, expressed
LOC_Os03g02460	chr3	519263	995454	retinol dehydrogenase, putative, expressed
LOC_Os03g02470	chr3	519263	995454	expressed protein
LOC_Os03g02480	chr3	519263	995454	inner membrane protein, putative, expressed
LOC_Os03g02500	chr3	519263	995454	retrotransposon protein, putative, Ty1-copia subclass, expressed
LOC_Os03g02514	chr3	519263	995454	hydrolase, alpha/beta fold family protein, putative, expressed
LOC_Os03g02530	chr3	519263	995454	OsRhmbd7 - Putative Rhomboid homologue, expressed
LOC_Os03g02540	chr3	519263	995454	proteasome subunit, putative, expressed
LOC_Os03g02544	chr3	519263	995454	expressed protein
LOC_Os03g02550	chr3	519263	995454	OsFBX76 - F-box domain containing protein, expressed
LOC_Os03g02560	chr3	519263	995454	cyclin-like F-box, putative, expressed
LOC_Os03g02570	chr3	519263	995454	dihydrodipicolinate reductase, putative, expressed
LOC_Os03g02580	chr3	519263	995454	armadillo, putative, expressed
LOC_Os03g02590	chr3	519263	995454	peroxisomal biogenesis factor 11, putative, expressed
LOC_Os03g02600	chr3	519263	995454	riboflavin biosynthesis protein ribD, putative, expressed
LOC_Os03g02610	chr3	519263	995454	glycosyl hydrolases family 16 protein, protein, expressed
LOC_Os03g02620	chr3	519263	995454	expressed protein
LOC_Os03g02630	chr3	519263	995454	retrotransposon protein, putative, unclassified
LOC_Os03g02640	chr3	519263	995454	methylthioribose kinase, putative, expressed
LOC_Os03g02650	chr3	519263	995454	ligA, putative, expressed
LOC_Os03g02660	chr3	519263	995454	expressed protein
LOC_Os03g02670	chr3	519263	995454	transporter family protein, putative, expressed
LOC_Os03g03000	chr3	1222782	1321781	helix-loop-helix DNA-binding domain containing protein, expressed
LOC_Os03g03010	chr3	1222782	1321781	expressed protein
LOC_Os03g03020	chr3	1222782	1321781	L11 domain containing ribosomal protein, putative, expressed
LOC_Os03g03034	chr3	1222782	1321781	flavonol synthase/flavanone 3-hydroxylase, putative, expressed
LOC_Os03g03050	chr3	1222782	1321781	expressed protein
LOC_Os03g03060	chr3	1222782	1321781	transposon protein, putative, unclassified, expressed
LOC_Os03g03070	chr3	1222782	1321781	transcription factor, putative, expressed
LOC_Os03g03080	chr3	1222782	1321781	expressed protein
LOC_Os03g03100	chr3	1222782	1321781	OsMADS50 - MADS-box family gene with MIKCc type-box, expressed
LOC_Os03g03110	chr3	1222782	1321781	expressed protein
LOC_Os03g03120	chr3	1222782	1321781	transposon protein, putative, Mutator sub-class, expressed
LOC_Os03g03130	chr3	1222782	1321781	ubiquitin-conjugating enzyme, putative, expressed
LOC_Os03g03770	chr3	1681658	1907570	expressed protein
LOC_Os03g03790	chr3	1681658	1907570	AMP-binding domain containing protein, expressed
LOC_Os03g03800	chr3	1681658	1907570	expressed protein
LOC_Os03g03810	chr3	1681658	1907570	DEF8 - Defensin and Defensin-like DEFL family, expressed
LOC_Os03g03820	chr3	1681658	1907570	adenylate kinase, putative, expressed
LOC_Os03g03830	chr3	1681658	1907570	EF hand family protein, putative, expressed
LOC_Os03g03840	chr3	1681658	1907570	expressed protein
LOC_Os03g03850	chr3	1681658	1907570	GATA zinc finger domain containing protein, expressed
LOC_Os03g03860	chr3	1681658	1907570	expressed protein
LOC_Os03g03870	chr3	1681658	1907570	DNA-binding bromodomain-containing protein, putative, expressed
LOC_Os03g03880	chr3	1681658	1907570	protein kinase, putative, expressed
LOC_Os03g03890	chr3	1681658	1907570	protein kinase family protein, putative, expressed
LOC_Os03g03900	chr3	1681658	1907570	NIN, putative, expressed
LOC_Os03g03910	chr3	1681658	1907570	catalase domain containing protein, expressed
LOC_Os03g03920	chr3	1681658	1907570	Ubiquitin family domain containing protein, expressed
LOC_Os03g03930	chr3	1681658	1907570	tRNA nucleotidyltransferase/polyA polymerase family protein, putative, expressed
LOC_Os03g03949	chr3	1681658	1907570	electron carrier/ protein disulfide oxidoreductase, putative, expressed
LOC_Os03g03970	chr3	1681658	1907570	retrotransposon protein, putative, unclassified, expressed
LOC_Os03g03980	chr3	1681658	1907570	coiled-coil domain-containing protein 124, putative, expressed
LOC_Os03g03990	chr3	1681658	1907570	signal recognition particle 43 kDa protein, chloroplast precursor, putative, expressed
LOC_Os03g04000	chr3	1681658	1907570	AMP-binding domain containing protein, expressed
LOC_Os03g04010	chr3	1681658	1907570	hypothetical protein
LOC_Os03g04020	chr3	1681658	1907570	expansin precursor, putative, expressed
LOC_Os03g04030	chr3	1681658	1907570	HVA22, putative, expressed
LOC_Os03g04040	chr3	1681658	1907570	expressed protein
LOC_Os03g04050	chr3	1681658	1907570	protein kinase family protein, putative, expressed
LOC_Os03g04060	chr3	1681658	1907570	CHIT16 - Chitinase family protein precursor, expressed
LOC_Os03g04070	chr3	1681658	1907570	no apical meristem protein, putative, expressed
LOC_Os03g04080	chr3	1681658	1907570	expressed protein
LOC_Os03g04100	chr3	1681658	1907570	expressed protein
LOC_Os03g04110	chr3	1681658	1907570	lysM domain-containing GPI-anchored protein precursor, putative, expressed
LOC_Os03g04120	chr3	1681658	1907570	AMP-binding enzyme, putative, expressed
LOC_Os03g04130	chr3	1681658	1907570	AMP-binding domain containing protein, expressed
LOC_Os03g04140	chr3	1681658	1907570	serine acetyltransferase protein, putative, expressed
LOC_Os03g04150	chr3	1681658	1907570	transposon protein, putative, Mutator sub-class, expressed
LOC_Os04g46210	chr4	27363626	27685989	transposon protein, putative, Mariner sub-class, expressed
LOC_Os04g46220	chr4	27363626	27685989	ethylene-responsive transcription factor, putative, expressed
LOC_Os04g46240	chr4	27363626	27685989	AP2 domain containing protein, expressed
LOC_Os04g46250	chr4	27363626	27685989	AP2 domain containing protein, expressed
LOC_Os04g46260	chr4	27363626	27685989	expressed protein
LOC_Os04g46270	chr4	27363626	27685989	expressed protein
LOC_Os04g46280	chr4	27363626	27685989	hydrolase, NUDIX family, domain containing protein, expressed
LOC_Os04g46290	chr4	27363626	27685989	ethylene-responsive element-binding protein, putative, expressed
LOC_Os04g46300	chr4	27363626	27685989	disease resistance protein RPM1, putative, expressed
LOC_Os04g46310	chr4	27363626	27685989	HEAT repeat family protein, putative, expressed
LOC_Os04g46320	chr4	27363626	27685989	inactive receptor kinase At2g26730 precursor, putative, expressed
LOC_Os04g46330	chr4	27363626	27685989	expressed protein
LOC_Os04g46350	chr4	27363626	27685989	homeobox associated leucine zipper, putative, expressed
LOC_Os04g46360	chr4	27363626	27685989	expressed protein
LOC_Os04g46370	chr4	27363626	27685989	L-asparaginase precursor protein, putative, expressed
LOC_Os04g46380	chr4	27363626	27685989	expressed protein
LOC_Os04g46384	chr4	27363626	27685989	MYB family transcription factor, putative, expressed
LOC_Os04g46390	chr4	27363626	27685989	chaperone protein dnaJ, putative, expressed
LOC_Os04g46400	chr4	27363626	27685989	AP2 domain containing protein, expressed
LOC_Os04g46410	chr4	27363626	27685989	AP2 domain containing protein, expressed
LOC_Os04g46420	chr4	27363626	27685989	expressed protein
LOC_Os04g46430	chr4	27363626	27685989	expressed protein
LOC_Os04g46440	chr4	27363626	27685989	AP2 domain containing protein, expressed
LOC_Os04g46444	chr4	27363626	27685989	expressed protein
LOC_Os04g46450	chr4	27363626	27685989	zinc finger, C3HC4 type domain containing protein, expressed
LOC_Os04g46460	chr4	27363626	27685989	amino acid kinase, putative, expressed
LOC_Os04g46470	chr4	27363626	27685989	carotenoid cleavage dioxygenase 7, chloroplast precursor, putative, expressed
LOC_Os04g46480	chr4	27363626	27685989	expressed protein
LOC_Os04g46490	chr4	27363626	27685989	aquaporin protein, putative, expressed
LOC_Os04g46500	chr4	27363626	27685989	retrotransposon protein, putative, unclassified, expressed
LOC_Os04g46510	chr4	27363626	27685989	transposon protein, putative, unclassified, expressed
LOC_Os04g46520	chr4	27363626	27685989	retrotransposon protein, putative, unclassified, expressed
LOC_Os04g46530	chr4	27363626	27685989	retrotransposon protein, putative, unclassified, expressed
LOC_Os04g46540	chr4	27363626	27685989	expressed protein
LOC_Os04g46550	chr4	27363626	27685989	hypothetical protein
LOC_Os04g46560	chr4	27363626	27685989	lactate/malate dehydrogenase, putative, expressed
LOC_Os04g46570	chr4	27363626	27685989	growth regulator related protein, putative, expressed
LOC_Os04g46580	chr4	27363626	27685989	OsSPL7 - SBP-box gene family member, expressed
LOC_Os04g46600	chr4	27363626	27685989	zinc finger protein, putative, expressed
LOC_Os04g46610	chr4	27363626	27685989	PAP fibrillin family domain containing protein, expressed
LOC_Os04g46620	chr4	27363626	27685989	T-complex protein, putative, expressed
LOC_Os04g46630	chr4	27363626	27685989	expansin precursor, putative, expressed
LOC_Os04g46639	chr4	27363626	27685989	expressed protein
LOC_Os04g46650	chr4	27363626	27685989	expansin precursor, putative, expressed
LOC_Os04g46660	chr4	27363626	27685989	cyclin, putative, expressed
LOC_Os04g46670	chr4	27363626	27685989	ZOS4-09 - C2H2 zinc finger protein, expressed
LOC_Os04g46680	chr4	27363626	27685989	ZOS4-10 - C2H2 zinc finger protein, expressed
LOC_Os05g16395	chr5	9283326	9577230	expressed protein
LOC_Os05g16400	chr5	9283326	9577230	transposon protein, putative, CACTA, En/Spm sub-class, expressed
LOC_Os05g16410	chr5	9283326	9577230	retrotransposon, putative, centromere-specific, expressed
LOC_Os05g16420	chr5	9283326	9577230	SHR5-receptor-like kinase, putative, expressed
LOC_Os05g16430	chr5	9283326	9577230	SHR5-receptor-like kinase, putative, expressed
LOC_Os05g16440	chr5	9283326	9577230	expressed protein
LOC_Os05g16450	chr5	9283326	9577230	hypothetical protein
LOC_Os05g16460	chr5	9283326	9577230	expressed protein
LOC_Os05g16470	chr5	9283326	9577230	retrotransposon protein, putative, unclassified, expressed
LOC_Os05g16480	chr5	9283326	9577230	retrotransposon protein, putative, unclassified, expressed
LOC_Os05g16490	chr5	9283326	9577230	expressed protein
LOC_Os05g16500	chr5	9283326	9577230	transposon protein, putative, unclassified, expressed
LOC_Os05g16510	chr5	9283326	9577230	retrotransposon, putative, centromere-specific
LOC_Os05g16520	chr5	9283326	9577230	retrotransposon protein, putative, unclassified, expressed
LOC_Os05g16530	chr5	9283326	9577230	retrotransposon protein, putative, unclassified, expressed
LOC_Os05g16540	chr5	9283326	9577230	expressed protein
LOC_Os05g16550	chr5	9283326	9577230	retrotransposon protein, putative, unclassified, expressed
LOC_Os05g16560	chr5	9283326	9577230	retrotransposon protein, putative, unclassified, expressed
LOC_Os05g16570	chr5	9283326	9577230	retrotransposon protein, putative, unclassified, expressed
LOC_Os05g16580	chr5	9283326	9577230	transposon protein, putative, CACTA, En/Spm sub-class, expressed
LOC_Os05g16590	chr5	9283326	9577230	transposon protein, putative, CACTA, En/Spm sub-class, expressed
LOC_Os05g16600	chr5	9283326	9577230	retrotransposon protein, putative, Ty3-gypsy subclass
LOC_Os05g16610	chr5	9283326	9577230	transposon protein, putative, CACTA, En/Spm sub-class
LOC_Os05g16620	chr5	9283326	9577230	transposon protein, putative, CACTA, En/Spm sub-class, expressed
LOC_Os05g16630	chr5	9283326	9577230	thioredoxin domain-containing protein 9, putative, expressed
LOC_Os05g16640	chr5	9283326	9577230	DUF630/DUF632 domains containing protein, putative, expressed
LOC_Os05g16660	chr5	9283326	9577230	WD domain, G-beta repeat domain containing protein, expressed
LOC_Os05g16664	chr5	9283326	9577230	expressed protein
LOC_Os05g16670	chr5	9283326	9577230	SHR5-receptor-like kinase, putative, expressed
LOC_Os05g16680	chr5	9283326	9577230	retrotransposon protein, putative, Ty3-gypsy subclass, expressed
LOC_Os05g16690	chr5	9283326	9577230	retrotransposon protein, putative, Ty3-gypsy subclass, expressed
LOC_Os05g16700	chr5	9283326	9577230	retrotransposon protein, putative, Ty3-gypsy subclass
LOC_Os05g16710	chr5	9283326	9577230	retrotransposon protein, putative, unclassified
LOC_Os05g16720	chr5	9283326	9577230	retrotransposon protein, putative, Ty3-gypsy subclass, expressed
LOC_Os05g16740	chr5	9283326	9577230	SHR5-receptor-like kinase, putative, expressed
LOC_Os05g16750	chr5	9283326	9577230	expressed protein
LOC_Os05g16760	chr5	9283326	9577230	retrotransposon protein, putative, Ty3-gypsy subclass
LOC_Os05g16770	chr5	9283326	9577230	retrotransposon protein, putative, Ty3-gypsy subclass, expressed
LOC_Os05g16780	chr5	9283326	9577230	retrotransposon protein, putative, unclassified, expressed
LOC_Os05g16790	chr5	9283326	9577230	retrotransposon protein, putative, Ty3-gypsy subclass, expressed
LOC_Os05g16800	chr5	9283326	9577230	retrotransposon protein, putative, unclassified, expressed
LOC_Os05g17280	chr5	9889823	10112084	retrotransposon protein, putative, unclassified, expressed
LOC_Os05g17290	chr5	9889823	10112084	retrotransposon protein, putative, unclassified, expressed
LOC_Os05g17300	chr5	9889823	10112084	expressed protein
LOC_Os05g17310	chr5	9889823	10112084	retrotransposon protein, putative, unclassified
LOC_Os05g17320	chr5	9889823	10112084	retrotransposon protein, putative, Ty3-gypsy subclass, expressed
LOC_Os05g17330	chr5	9889823	10112084	retrotransposon protein, putative, Ty3-gypsy subclass
LOC_Os05g17340	chr5	9889823	10112084	retrotransposon protein, putative, unclassified
LOC_Os05g17350	chr5	9889823	10112084	retrotransposon protein, putative, unclassified
LOC_Os05g17360	chr5	9889823	10112084	retrotransposon protein, putative, Ty3-gypsy subclass, expressed
LOC_Os05g17370	chr5	9889823	10112084	retrotransposon protein, putative, Ty3-gypsy subclass, expressed
LOC_Os05g17380	chr5	9889823	10112084	retrotransposon protein, putative, unclassified, expressed
LOC_Os05g17390	chr5	9889823	10112084	expressed protein
LOC_Os05g17400	chr5	9889823	10112084	retrotransposon, putative, centromere-specific
LOC_Os05g17410	chr5	9889823	10112084	retrotransposon protein, putative, Ty3-gypsy subclass, expressed
LOC_Os05g17420	chr5	9889823	10112084	retrotransposon protein, putative, Ty3-gypsy subclass, expressed
LOC_Os05g17430	chr5	9889823	10112084	retrotransposon protein, putative, Ty3-gypsy subclass, expressed
LOC_Os05g17440	chr5	9889823	10112084	transposon protein, putative, unclassified
LOC_Os05g17450	chr5	9889823	10112084	retrotransposon protein, putative, Ty3-gypsy subclass
LOC_Os05g17460	chr5	9889823	10112084	retrotransposon protein, putative, Ty3-gypsy subclass
LOC_Os05g17470	chr5	9889823	10112084	retrotransposon protein, putative, Ty3-gypsy subclass, expressed
LOC_Os05g17490	chr5	9889823	10112084	retrotransposon protein, putative, unclassified
LOC_Os05g17500	chr5	9889823	10112084	retrotransposon protein, putative, Ty3-gypsy subclass
LOC_Os05g17510	chr5	9889823	10112084	retrotransposon protein, putative, unclassified
LOC_Os05g17520	chr5	9889823	10112084	retrotransposon protein, putative, Ty3-gypsy subclass
LOC_Os05g17530	chr5	9889823	10112084	retrotransposon protein, putative, unclassified
LOC_Os05g17540	chr5	9889823	10112084	retrotransposon protein, putative, unclassified, expressed
LOC_Os05g17550	chr5	9889823	10112084	retrotransposon protein, putative, unclassified, expressed
LOC_Os05g17560	chr5	9889823	10112084	retrotransposon protein, putative, Ty3-gypsy subclass
LOC_Os05g17570	chr5	9889823	10112084	retrotransposon protein, putative, Ty3-gypsy subclass, expressed
LOC_Os05g17580	chr5	9889823	10112084	retrotransposon protein, putative, unclassified
LOC_Os05g17590	chr5	9889823	10112084	retrotransposon protein, putative, unclassified, expressed
LOC_Os05g20470	chr5	12006893	12200901	expressed protein
LOC_Os05g20480	chr5	12006893	12200901	retrotransposon protein, putative, Ty3-gypsy subclass, expressed
LOC_Os05g20490	chr5	12006893	12200901	retrotransposon protein, putative, unclassified
LOC_Os05g20500	chr5	12006893	12200901	retrotransposon protein, putative, Ty3-gypsy subclass, expressed
LOC_Os05g20510	chr5	12006893	12200901	retrotransposon protein, putative, Ty3-gypsy subclass, expressed
LOC_Os05g20520	chr5	12006893	12200901	retrotransposon protein, putative, Ty3-gypsy subclass
LOC_Os05g20530	chr5	12006893	12200901	transposon protein, putative, CACTA, En/Spm sub-class, expressed
LOC_Os05g20540	chr5	12006893	12200901	expressed protein
LOC_Os05g20550	chr5	12006893	12200901	retrotransposon protein, putative, unclassified
LOC_Os05g20560	chr5	12006893	12200901	retrotransposon protein, putative, unclassified, expressed
LOC_Os05g20570	chr5	12006893	12200901	invertase/pectin methylesterase inhibitor family protein, putative, expressed
LOC_Os05g20590	chr5	12006893	12200901	expressed protein
LOC_Os05g20600	chr5	12006893	12200901	retrotransposon, putative, centromere-specific
LOC_Os05g20610	chr5	12006893	12200901	retrotransposon protein, putative, unclassified
LOC_Os05g20620	chr5	12006893	12200901	retrotransposon protein, putative, unclassified, expressed
LOC_Os05g20630	chr5	12006893	12200901	retrotransposon protein, putative, unclassified, expressed
LOC_Os05g20640	chr5	12006893	12200901	retrotransposon, putative, centromere-specific
LOC_Os05g20650	chr5	12006893	12200901	retrotransposon protein, putative, unclassified
LOC_Os05g20660	chr5	12006893	12200901	hypothetical protein
LOC_Os05g20670	chr5	12006893	12200901	retrotransposon protein, putative, Ty1-copia subclass, expressed
LOC_Os05g20680	chr5	12006893	12200901	retrotransposon protein, putative, Ty3-gypsy subclass
LOC_Os05g20690	chr5	12006893	12200901	retrotransposon protein, putative, Ty3-gypsy subclass
LOC_Os05g20700	chr5	12006893	12200901	retrotransposon protein, putative, Ty3-gypsy subclass, expressed
LOC_Os05g20710	chr5	12006893	12200901	retrotransposon protein, putative, Ty3-gypsy subclass, expressed
LOC_Os05g20720	chr5	12006893	12200901	retrotransposon protein, putative, unclassified
LOC_Os05g20730	chr5	12006893	12200901	retrotransposon, putative, centromere-specific, expressed
LOC_Os05g20740	chr5	12006893	12200901	transposon protein, putative, CACTA, En/Spm sub-class, expressed
LOC_Os05g20750	chr5	12006893	12200901	transposon protein, putative, CACTA, En/Spm sub-class, expressed
LOC_Os05g20760	chr5	12006893	12200901	retrotransposon protein, putative, unclassified
LOC_Os05g20770	chr5	12006893	12200901	retrotransposon protein, putative, Ty3-gypsy subclass, expressed
LOC_Os06g01270	chr6	175373	304839	expressed protein
LOC_Os06g01280	chr6	175373	304839	retrotransposon protein, putative, unclassified
LOC_Os06g01290	chr6	175373	304839	expressed protein
LOC_Os06g01304	chr6	175373	304839	spotted leaf 11, putative, expressed
LOC_Os06g01320	chr6	175373	304839	chromo domain containing protein, expressed
LOC_Os06g01340	chr6	175373	304839	CCT/B-box zinc finger protein, putative, expressed
LOC_Os06g01350	chr6	175373	304839	transferase family protein, putative, expressed
LOC_Os06g01360	chr6	175373	304839	homogentisate 1,2-dioxygenase, putative, expressed
LOC_Os06g01370	chr6	175373	304839	DNA-binding protein-related, putative, expressed
LOC_Os06g01390	chr6	175373	304839	acyl-coenzyme A oxidase 1.2, peroxisomal, putative, expressed
LOC_Os06g01400	chr6	175373	304839	glycyl-tRNA synthetase 2, chloroplast/mitochondrial precursor, putative, expressed
LOC_Os06g01410	chr6	175373	304839	glutamine cyclotransferase precursor, putative, expressed
LOC_Os06g01420	chr6	175373	304839	retrotransposon protein, putative, unclassified, expressed
LOC_Os06g01430	chr6	175373	304839	retrotransposon protein, putative, unclassified, expressed
LOC_Os06g01440	chr6	175373	304839	integral membrane protein, putative, expressed
LOC_Os06g01450	chr6	175373	304839	methyltransferase, putative, expressed
LOC_Os06g01460	chr6	175373	304839	expressed protein
LOC_Os06g01470	chr6	175373	304839	AGAP000326-PA, putative, expressed
LOC_Os06g01480	chr6	175373	304839	NAC domain containing protein, putative, expressed
LOC_Os06g01490	chr6	175373	304839	monocopper oxidase, putative, expressed
LOC_Os10g37350	chr10	20003546	20361883	expressed protein
LOC_Os10g37370	chr10	20003546	20361883	retrotransposon protein, putative, unclassified, expressed
LOC_Os10g37400	chr10	20003546	20361883	DUF538 domain containing protein, putative, expressed
LOC_Os10g37410	chr10	20003546	20361883	TBC domain containing protein, expressed
LOC_Os10g37420	chr10	20003546	20361883	cytochrome b5-like Heme/Steroid binding domain containing protein, expressed
LOC_Os10g37430	chr10	20003546	20361883	expressed protein
LOC_Os10g37440	chr10	20003546	20361883	expressed protein
LOC_Os10g37450	chr10	20003546	20361883	expressed protein
LOC_Os10g37459	chr10	20003546	20361883	hypothetical protein
LOC_Os10g37468	chr10	20003546	20361883	retrotransposon protein, putative, Ty1-copia subclass, expressed
LOC_Os10g37480	chr10	20003546	20361883	STE_PAK_Ste20_STLK.6 - STE kinases include homologs to sterile 7, sterile 11 and sterile 20 from yeast, expressed
LOC_Os10g37490	chr10	20003546	20361883	DNA excision repair protein ERCC-1, putative, expressed
LOC_Os10g37500	chr10	20003546	20361883	AAA-type ATPase family protein, putative, expressed
LOC_Os10g37510	chr10	20003546	20361883	expressed protein
LOC_Os10g37520	chr10	20003546	20361883	major facilitator superfamily domain-containing protein 5, putative, expressed
LOC_Os10g37530	chr10	20003546	20361883	mitochondrial import inner membrane translocase subunit Tim17, putative, expressed
LOC_Os10g37540	chr10	20003546	20361883	OsFBDUF48 - F-box and DUF domain containing protein, expressed
LOC_Os10g37560	chr10	20003546	20361883	expressed protein
LOC_Os10g37570	chr10	20003546	20361883	OsFBDUF49 - F-box and DUF domain containing protein, expressed
LOC_Os10g37580	chr10	20003546	20361883	expressed protein
LOC_Os10g37590	chr10	20003546	20361883	expressed protein
LOC_Os10g37600	chr10	20003546	20361883	expressed protein
LOC_Os10g37604	chr10	20003546	20361883	expressed protein
LOC_Os10g37610	chr10	20003546	20361883	retrotransposon protein, putative, unclassified, expressed
LOC_Os10g37620	chr10	20003546	20361883	retrotransposon protein, putative, unclassified, expressed
LOC_Os10g37630	chr10	20003546	20361883	UBX domain-containing protein, putative, expressed
LOC_Os10g37640	chr10	20003546	20361883	HIT zinc finger domain containing protein, expressed
LOC_Os10g37650	chr10	20003546	20361883	impaired sucrose induction 1, putative, expressed
LOC_Os10g37660	chr10	20003546	20361883	trehalase precursor, putative, expressed
LOC_Os10g37670	chr10	20003546	20361883	actin-depolymerizing factor, putative, expressed
LOC_Os10g37680	chr10	20003546	20361883	expressed protein
LOC_Os10g37690	chr10	20003546	20361883	inner membrane protein, putative, expressed
LOC_Os10g37700	chr10	20003546	20361883	hydrolase protein, putative, expressed
LOC_Os10g37710	chr10	20003546	20361883	hydrolase, alpha/beta fold family protein, putative, expressed
LOC_Os10g37720	chr10	20003546	20361883	hydrolase, alpha/beta fold family protein, putative, expressed
LOC_Os10g37730	chr10	20003546	20361883	pollen ankyrin, putative, expressed
LOC_Os10g37740	chr10	20003546	20361883	CGMC_GSK.9 - CGMC includes CDA, MAPK, GSK3, and CLKC kinases, expressed
LOC_Os10g37760	chr10	20003546	20361883	OsRhmbd17 - Putative Rhomboid homologue, expressed
LOC_Os10g37770	chr10	20003546	20361883	dehydration response related protein, putative, expressed
LOC_Os10g37780	chr10	20003546	20361883	retrotransposon protein, putative, unclassified, expressed
LOC_Os10g37800	chr10	20003546	20361883	retrotransposon protein, putative, unclassified, expressed
LOC_Os10g37810	chr10	20003546	20361883	transposon protein, putative, CACTA, En/Spm sub-class, expressed
LOC_Os10g37820	chr10	20003546	20361883	transposon protein, putative, CACTA, En/Spm sub-class, expressed
LOC_Os10g37830	chr10	20003546	20361883	OsFBX391 - F-box domain containing protein, expressed
LOC_Os10g37840	chr10	20003546	20361883	CCB2, putative, expressed
LOC_Os10g37850	chr10	20003546	20361883	armadillo, putative, expressed
LOC_Os10g37860	chr10	20003546	20361883	expressed protein
LOC_Os10g37870	chr10	20003546	20361883	expressed protein
LOC_Os10g37880	chr10	20003546	20361883	oxidoreductase, putative, expressed
LOC_Os10g37899	chr10	20003546	20361883	transposon protein, putative, unclassified, expressed
LOC_Os10g37920	chr10	20003546	20361883	MATE efflux family protein, putative, expressed
LOC_Os10g37940	chr10	20003546	20361883	retrotransposon protein, putative, unclassified, expressed
LOC_Os10g37950	chr10	20003546	20361883	conserved hypothetical protein
LOC_Os10g37960	chr10	20003546	20361883	retrotransposon protein, putative, unclassified, expressed
LOC_Os10g37970	chr10	20003546	20361883	expressed protein
LOC_Os10g37980	chr10	20003546	20361883	prephenate dehydratase domain containing protein, expressed
LOC_Os10g37990	chr10	20003546	20361883	expressed protein
LOC_Os10g38000	chr10	20003546	20361883	dehydration-responsive element-binding protein, putative, expressed
LOC_Os10g38030	chr10	20363169	20860856	per1-like family protein, putative, expressed
LOC_Os10g38040	chr10	20363169	20860856	lysM domain containing protein, putative, expressed
LOC_Os10g38050	chr10	20363169	20860856	HOTHEAD precursor, putative, expressed
LOC_Os10g38060	chr10	20363169	20860856	phospholipase D, putative, expressed
LOC_Os10g38070	chr10	20363169	20860856	expressed protein
LOC_Os10g38080	chr10	20363169	20860856	OsSub61 - Putative Subtilisin homologue, expressed
LOC_Os10g38090	chr10	20363169	20860856	cytochrome P450, putative, expressed
LOC_Os10g38100	chr10	20363169	20860856	thaumatin-like protein precursor, putative, expressed
LOC_Os10g38110	chr10	20363169	20860856	cytochrome P450, putative, expressed
LOC_Os10g38120	chr10	20363169	20860856	cytochrome P450, putative, expressed
LOC_Os10g38130	chr10	20363169	20860856	expressed protein
LOC_Os10g38140	chr10	20363169	20860856	glutathione S-transferase, putative, expressed
LOC_Os10g38150	chr10	20363169	20860856	glutathione S-transferase, N-terminal domain containing protein, expressed
LOC_Os10g38160	chr10	20363169	20860856	glutathione S-transferase, putative, expressed
LOC_Os10g38170	chr10	20363169	20860856	expressed protein
LOC_Os10g38189	chr10	20363169	20860856	glutathione S-transferase, putative, expressed
LOC_Os10g38196	chr10	20363169	20860856	uncharacterized protein ycf68, putative
LOC_Os10g38206	chr10	20363169	20860856	NADPH-dependent oxidoreductase, putative, expressed
LOC_Os10g38212	chr10	20363169	20860856	NADPH-dependent oxidoreductase, putative, expressed
LOC_Os10g38214	chr10	20363169	20860856	chloroplast 30S ribosomal protein S4, putative, expressed
LOC_Os10g38216	chr10	20363169	20860856	photosystem I assembly protein ycf3, putative, expressed
LOC_Os10g38229	chr10	20363169	20860856	photosystem I P700 chlorophyll a apoprotein A1, putative, expressed
LOC_Os10g38234	chr10	20363169	20860856	photosystem I P700 chlorophyll a apoprotein A2, putative, expressed
LOC_Os10g38238	chr10	20363169	20860856	chloroplast 30S ribosomal protein S14, putative, expressed
LOC_Os10g38272	chr10	20363169	20860856	ATP synthase B chain, putative, expressed
LOC_Os10g38274	chr10	20363169	20860856	ATP synthase C chain, putative, expressed
LOC_Os10g38276	chr10	20363169	20860856	chloroplast ATP synthase a chain precursor, putative, expressed
LOC_Os10g38278	chr10	20363169	20860856	chloroplast 30S ribosomal protein S2, putative, expressed
LOC_Os10g38314	chr10	20363169	20860856	glutathione S-transferase, N-terminal domain containing protein, expressed
LOC_Os10g38340	chr10	20363169	20860856	glutathione S-transferase GSTU6, putative, expressed
LOC_Os10g38350	chr10	20363169	20860856	glutathione S-transferase, putative, expressed
LOC_Os10g38360	chr10	20363169	20860856	glutathione S-transferase, putative, expressed
LOC_Os10g38370	chr10	20363169	20860856	retrotransposon protein, putative, Ty3-gypsy subclass, expressed
LOC_Os10g38386	chr10	20363169	20860856	retrotransposon protein, putative, Ty3-gypsy subclass, expressed
LOC_Os10g38402	chr10	20363169	20860856	retrotransposon protein, putative, Ty3-gypsy subclass, expressed
LOC_Os10g38420	chr10	20363169	20860856	retrotransposon protein, putative, Ty3-gypsy subclass, expressed
LOC_Os10g38440	chr10	20363169	20860856	retrotransposon protein, putative, unclassified, expressed
LOC_Os10g38450	chr10	20363169	20860856	receptor-like protein kinase 2 precursor, putative, expressed
LOC_Os10g38460	chr10	20363169	20860856	retrotransposon protein, putative, Ty3-gypsy subclass, expressed
LOC_Os10g38470	chr10	20363169	20860856	glutathione S-transferase, putative, expressed
LOC_Os10g38489	chr10	20363169	20860856	glutathione S-transferase GSTU6, putative, expressed
LOC_Os10g38510	chr10	20363169	20860856	expressed protein
LOC_Os10g38520	chr10	20363169	20860856	retrotransposon protein, putative, unclassified
LOC_Os10g38540	chr10	20363169	20860856	glutathione S-transferase, putative, expressed
LOC_Os10g38550	chr10	20363169	20860856	retrotransposon protein, putative, unclassified
LOC_Os10g38560	chr10	20363169	20860856	retrotransposon protein, putative, unclassified, expressed
LOC_Os10g38570	chr10	20363169	20860856	retrotransposon protein, putative, unclassified
LOC_Os10g38580	chr10	20363169	20860856	glutathione S-transferase, putative, expressed
LOC_Os10g38590	chr10	20363169	20860856	glutathione S-transferase, N-terminal domain containing protein, expressed
LOC_Os10g38600	chr10	20363169	20860856	glutathione S-transferase GSTU6, putative, expressed
LOC_Os10g38610	chr10	20363169	20860856	glutathione S-transferase, putative, expressed
LOC_Os10g38630	chr10	20363169	20860856	glutathione S-transferase, putative, expressed
LOC_Os10g38640	chr10	20363169	20860856	glutathione S-transferase, putative, expressed
LOC_Os10g38660	chr10	20363169	20860856	glutathione S-transferase, putative, expressed
LOC_Os10g38664	chr10	20363169	20860856	hypothetical protein
LOC_Os10g38670	chr10	20363169	20860856	glutathione S-transferase, putative, expressed
LOC_Os10g38680	chr10	20363169	20860856	expressed protein
LOC_Os10g38690	chr10	20363169	20860856	glutathione S-transferase, putative, expressed
LOC_Os10g38700	chr10	20363169	20860856	glutathione S-transferase, putative, expressed
LOC_Os10g38710	chr10	20363169	20860856	glutathione S-transferase, putative, expressed
LOC_Os10g38720	chr10	20363169	20860856	glutathione S-transferase, putative, expressed
LOC_Os10g38730	chr10	20363169	20860856	glutathione S-transferase, putative, expressed
LOC_Os10g38740	chr10	20363169	20860856	glutathione S-transferase, putative, expressed
LOC_Os10g38750	chr10	20363169	20860856	transposon protein, putative, Mutator sub-class, expressed
LOC_Os10g38760	chr10	20363169	20860856	expressed protein
LOC_Os10g38770	chr10	20363169	20860856	GRF zinc finger family protein, expressed
LOC_Os10g38780	chr10	20363169	20860856	glutathione S-transferase, putative, expressed
LOC_Os10g38790	chr10	20363169	20860856	expressed protein
LOC_Os10g38800	chr10	20363169	20860856	leucine-rich repeat transmembrane protein kinase, putative, expressed
LOC_Os10g38820	chr10	20363169	20860856	bZIP family transcription factor, putative, expressed
LOC_Os10g38834	chr10	20363169	20860856	no apical meristem protein, putative, expressed
LOC_Os10g38850	chr10	20363169	20860856	amine oxidase, putative, expressed
LOC_Os10g38860	chr10	20363169	20860856	hydrolase, alpha/beta fold family domain containing protein, expressed
LOC_Os10g38870	chr10	20363169	20860856	heavy metal-associated domain containing protein, expressed
LOC_Os10g38880	chr10	20363169	20860856	DUF623 domain containing protein, expressed
LOC_Os10g38890	chr10	20363169	20860856	expressed protein
LOC_Os10g38900	chr10	20363169	20860856	erythronate-4-phosphate dehydrogenase, putative, expressed
LOC_Os10g38910	chr10	20363169	20860856	expressed protein
LOC_Os10g38920	chr10	20363169	20860856	protein kinase domain containing protein, expressed
LOC_Os10g38930	chr10	20363169	20860856	shikimate/quinate 5-dehydrogenase, putative, expressed
LOC_Os10g38940	chr10	20363169	20860856	fatty acid hydroxylase, putative, expressed
LOC_Os10g38950	chr10	20363169	20860856	CGMC_MAPKCMGC_2_ERK.14 - CGMC includes CDA, MAPK, GSK3, and CLKC kinases, expressed
LOC_Os10g38954	chr10	20363169	20860856	hypothetical protein
LOC_Os10g38960	chr10	20363169	20860856	lectin-like receptor kinase, putative, expressed
LOC_Os10g38970	chr10	20363169	20860856	ethylene-responsive element-binding protein, putative, expressed
LOC_Os10g38980	chr10	20363169	20860856	expressed protein
LOC_Os10g39000	chr10	20363169	20860856	expressed protein
LOC_Os10g39010	chr10	20363169	20860856	TKL_IRAK_CrRLK1L-1.16 - The CrRLK1L-1 subfamily has homology to the CrRLK1L homolog, expressed
LOC_Os10g39020	chr10	20363169	20860856	fringe-related protein, putative, expressed
LOC_Os10g39030	chr10	20363169	20860856	homeobox domain containing protein, expressed
LOC_Os10g39044	chr10	20363169	20860856	expressed protein
LOC_Os10g39060	chr10	20363169	20860856	expressed protein
LOC_Os10g39070	chr10	20363169	20860856	retrotransposon protein, putative, LINE subclass, expressed
LOC_Os10g39080	chr10	20363169	20860856	retrotransposon protein, putative, LINE subclass, expressed
LOC_Os10g39084	chr10	20363169	20860856	expressed protein
LOC_Os10g39090	chr10	20363169	20860856	hydrolase, alpha/beta fold family protein, putative, expressed
LOC_Os10g39100	chr10	20363169	20860856	uncharacterized Cys-rich domain containing protein, putative, expressed
LOC_Os10g39110	chr10	20363169	20860856	expansin precursor, putative, expressed
LOC_Os10g39120	chr10	20363169	20860856	ubiquitin-conjugating enzyme, putative, expressed
