# Supplementary material for: Natural Variation OsCd1<sup>V449</sup> Contributes to Reducing Cadmium Accumulation in Rice Grain
Source: Preprints.org preprint supplement (doi:10.20944/preprints201802.0075.v1), 2018-02-09
Supplement: Supplementary file 5 [file Table S4.xlsx]

## Sheet: Table S4
Supplementary Table 4. The candidate genes and the GoSlim assignments for annotated genes in QTLs
13 Candidate Genes
Model	Putative Function	GOSlim ID	GO Name	Type
LOC_Os02g13170.1	mitochondrial carrier protein, putative, expressed	GO:0006810	transport	P
LOC_Os02g13170.1	mitochondrial carrier protein, putative, expressed	GO:0016020	membrane	C
LOC_Os03g02150.1	adapitin protein, putative, expressed	GO:0005215	transporter activity	F
LOC_Os03g02150.1	adapitin protein, putative, expressed	GO:0005886	plasma membrane	C
LOC_Os03g02150.1	adapitin protein, putative, expressed	GO:0006810	transport	P
LOC_Os03g02380.1	major facilitator superfamily domain-containing protein 5, putative, expressed	GO:0006810	transport	P
LOC_Os03g02380.1	major facilitator superfamily domain-containing protein 5, putative, expressed	GO:0016020	membrane	C
LOC_Os03g02380.1	major facilitator superfamily domain-containing protein 5, putative, expressed	GO:0005773	vacuole	C
LOC_Os03g02390.1	mitochondrial import inner membrane translocase subunit Tim17, putative, expressed	GO:0006810	transport	P
LOC_Os03g02390.1	mitochondrial import inner membrane translocase subunit Tim17, putative, expressed	GO:0005215	transporter activity	F
LOC_Os03g02390.1	mitochondrial import inner membrane translocase subunit Tim17, putative, expressed	GO:0006810	transport	P
LOC_Os03g02390.1	mitochondrial import inner membrane translocase subunit Tim17, putative, expressed	GO:0009987	cellular process	P
LOC_Os03g02390.1	mitochondrial import inner membrane translocase subunit Tim17, putative, expressed	GO:0016043	cellular component organization	P
LOC_Os03g02390.1	mitochondrial import inner membrane translocase subunit Tim17, putative, expressed	GO:0016020	membrane	C
LOC_Os03g02390.1	mitochondrial import inner membrane translocase subunit Tim17, putative, expressed	GO:0005739	mitochondrion	C
LOC_Os03g02390.1	mitochondrial import inner membrane translocase subunit Tim17, putative, expressed	GO:0005215	transporter activity	F
LOC_Os03g02480.1	inner membrane protein, putative, expressed	GO:0006810	transport	P
LOC_Os03g02480.1	inner membrane protein, putative, expressed	GO:0003674	molecular_function	F
LOC_Os03g02480.1	inner membrane protein, putative, expressed	GO:0016020	membrane	C
LOC_Os03g02480.1	inner membrane protein, putative, expressed	GO:0005739	mitochondrion	C
LOC_Os03g02480.1	inner membrane protein, putative, expressed	GO:0006810	transport	P
LOC_Os03g02480.1	inner membrane protein, putative, expressed	GO:0016043	cellular component orga	C
LOC_Os03g02480.1	inner membrane protein, putative, expressed	GO:0009987	cellular process	P
LOC_Os03g03990.1	signal recognition particle 43 kDa protein, chloroplast precursor, putative, expressed	GO:0006810	transport	P
LOC_Os03g03990.1	signal recognition particle 43 kDa protein, chloroplast precursor, putative, expressed	GO:0009628	response to abiotic stimulus	P
LOC_Os03g03990.1	signal recognition particle 43 kDa protein, chloroplast precursor, putative, expressed	GO:0016020	membrane	C
LOC_Os03g03990.1	signal recognition particle 43 kDa protein, chloroplast precursor, putative, expressed	GO:0009536	plastid	C
LOC_Os03g03990.1	signal recognition particle 43 kDa protein, chloroplast precursor, putative, expressed	GO:0009579	thylakoid	C
LOC_Os03g03990.1	signal recognition particle 43 kDa protein, chloroplast precursor, putative, expressed	GO:0005515	protein binding	F
LOC_Os03g03990.1	signal recognition particle 43 kDa protein, chloroplast precursor, putative, expressed	GO:0003682	chromatin binding	F
LOC_Os03g03990.1	signal recognition particle 43 kDa protein, chloroplast precursor, putative, expressed	GO:0005737	cytoplasm	C
LOC_Os03g03990.1	signal recognition particle 43 kDa protein, chloroplast precursor, putative, expressed	GO:0006810	transport	P
LOC_Os03g03990.1	signal recognition particle 43 kDa protein, chloroplast precursor, putative, expressed	GO:0009987	cellular process	P
LOC_Os04g46490.1	aquaporin protein, putative, expressed	GO:0005215	transporter activity	F
LOC_Os04g46490.1	aquaporin protein, putative, expressed	GO:0006810	transport	P
LOC_Os04g46490.1	aquaporin protein, putative, expressed	GO:0016020	membrane	C
LOC_Os06g01290.1	expressed protein	GO:0005215	transporter activity	F
LOC_Os06g01290.1	expressed protein	GO:0006810	transport	P
LOC_Os06g01290.1	expressed protein	GO:0016020	membrane	C
LOC_Os10g37530.1	mitochondrial import inner membrane translocase subunit Tim17, putative, expressed	GO:0006810	transport	P
LOC_Os10g37530.1	mitochondrial import inner membrane translocase subunit Tim17, putative, expressed	GO:0005215	transporter activity	F
LOC_Os10g37530.1	mitochondrial import inner membrane translocase subunit Tim17, putative, expressed	GO:0009987	cellular process	P
LOC_Os10g37530.1	mitochondrial import inner membrane translocase subunit Tim17, putative, expressed	GO:0016043	cellular component organization	P
LOC_Os10g37530.1	mitochondrial import inner membrane translocase subunit Tim17, putative, expressed	GO:0016020	membrane	C
LOC_Os10g37530.1	mitochondrial import inner membrane translocase subunit Tim17, putative, expressed	GO:0005739	mitochondrion	C
LOC_Os10g37530.1	mitochondrial import inner membrane translocase subunit Tim17, putative, expressed	GO:0005215	transporter activity	F
LOC_Os10g37690.1	inner membrane protein, putative, expressed	GO:0006810	transport	P
LOC_Os10g37690.1	inner membrane protein, putative, expressed	GO:0003674	molecular_function	P
LOC_Os10g37690.1	inner membrane protein, putative, expressed	GO:0016020	membrane	C
LOC_Os10g37690.1	inner membrane protein, putative, expressed	GO:0005739	mitochondrion	C
LOC_Os10g37690.1	inner membrane protein, putative, expressed	GO:0006810	transport	P
LOC_Os10g37690.1	inner membrane protein, putative, expressed	GO:0016043	cellular component orga	C
LOC_Os10g37690.1	inner membrane protein, putative, expressed	GO:0009987	cellular process	P
LOC_Os10g37920.1	MATE efflux family protein, putative, expressed	GO:0005215	transporter activity	F
LOC_Os10g37920.1	MATE efflux family protein, putative, expressed	GO:0006810	transport	P
LOC_Os10g37920.1	MATE efflux family protein, putative, expressed	GO:0016020	membrane	C
LOC_Os10g38272.1	ATP synthase B chain, putative, expressed	GO:0006810	transport	P
LOC_Os10g38272.1	ATP synthase B chain, putative, expressed	GO:0005215	transporter activity	F
LOC_Os10g38272.1	ATP synthase B chain, putative, expressed	GO:0016020	membrane	C
LOC_Os10g38274.1	ATP synthase C chain, putative, expressed	GO:0006810	transport	P
LOC_Os10g38274.1	ATP synthase C chain, putative, expressed	GO:0005215	transporter activity	F
LOC_Os10g38274.1	ATP synthase C chain, putative, expressed	GO:0016020	membrane	C
LOC_Os10g38276.1	chloroplast ATP synthase a chain precursor, putative, expressed	GO:0005215	transporter activity	F
LOC_Os10g38276.1	chloroplast ATP synthase a chain precursor, putative, expressed	GO:0006810	transport	P
LOC_Os10g38276.1	chloroplast ATP synthase a chain precursor, putative, expressed	GO:0016020	membrane	P
GoSlim assignments
Model Putative Function GOSlim ID GO Name Type
LOC_Os02g12850.1 RNA recognition motif containing protein, expressed GO:0003723 RNA binding F
LOC_Os02g12850.1 RNA recognition motif containing protein, expressed GO:0000166 nucleotide binding F
LOC_Os02g12850.1 RNA recognition motif containing protein, expressed GO:0005829 cytosol C
LOC_Os02g12850.1 RNA recognition motif containing protein, expressed GO:0008150 biological_process P
LOC_Os02g12850.1 RNA recognition motif containing protein, expressed GO:0003676 nucleic acid binding F
LOC_Os02g12870.1 expressed protein GO:0003674 molecular_function F
LOC_Os02g12870.1 expressed protein GO:0008150 biological_process P
LOC_Os02g12870.1 expressed protein GO:0005886 plasma membrane C
LOC_Os02g12880.2 calcium-binding EF hand family protein, putative, expressed GO:0005488 binding F
LOC_Os02g12880.2 calcium-binding EF hand family protein, putative, expressed GO:0008150 biological_process P
LOC_Os02g12880.2 calcium-binding EF hand family protein, putative, expressed GO:0005886 plasma membrane C
LOC_Os02g12890.1 cytochrome P450, putative, expressed GO:0009653 anatomical structure morphogenesis P
LOC_Os02g12890.1 cytochrome P450, putative, expressed GO:0007275 multicellular organismal development P
LOC_Os02g12890.1 cytochrome P450, putative, expressed GO:0003674 molecular_function F
LOC_Os02g12890.1 cytochrome P450, putative, expressed GO:0005488 binding F
LOC_Os02g12890.1 cytochrome P450, putative, expressed GO:0008152 metabolic process P
LOC_Os02g12890.1 cytochrome P450, putative, expressed GO:0019825 oxygen binding F
LOC_Os02g12890.1 cytochrome P450, putative, expressed GO:0005623 cell C
LOC_Os02g12890.1 cytochrome P450, putative, expressed GO:0006810 transport P
LOC_Os02g12890.1 cytochrome P450, putative, expressed GO:0003824 catalytic activity F
LOC_Os02g12890.1 cytochrome P450, putative, expressed GO:0009058 biosynthetic process P
LOC_Os02g12890.1 cytochrome P450, putative, expressed GO:0009987 cellular process P
LOC_Os02g12890.1 cytochrome P450, putative, expressed GO:0019748 secondary metabolic process P
LOC_Os02g12890.1 cytochrome P450, putative, expressed GO:0006629 lipid metabolic process P
LOC_Os02g12900.1 cysteine synthase, putative, expressed GO:0005576 extracellular region C
LOC_Os02g12900.1 cysteine synthase, putative, expressed GO:0003824 catalytic activity F
LOC_Os02g12900.1 cysteine synthase, putative, expressed GO:0008150 biological_process P
LOC_Os02g12900.1 cysteine synthase, putative, expressed GO:0009058 biosynthetic process P
LOC_Os02g12900.1 cysteine synthase, putative, expressed GO:0009987 cellular process P
LOC_Os02g12900.1 cysteine synthase, putative, expressed GO:0005739 mitochondrion C
LOC_Os02g12900.1 cysteine synthase, putative, expressed GO:0009536 plastid C
LOC_Os02g12910.1 receptor-like protein kinase 5 precursor, putative, expressed GO:0016020 membrane C
LOC_Os02g12910.1 receptor-like protein kinase 5 precursor, putative, expressed GO:0008152 metabolic process P
LOC_Os02g12910.1 receptor-like protein kinase 5 precursor, putative, expressed GO:0009987 cellular process P
LOC_Os02g12910.1 receptor-like protein kinase 5 precursor, putative, expressed GO:0016301 kinase activity F
LOC_Os02g12910.1 receptor-like protein kinase 5 precursor, putative, expressed GO:0006464 protein modification process P
LOC_Os02g12910.1 receptor-like protein kinase 5 precursor, putative, expressed GO:0005886 plasma membrane C
LOC_Os02g13020.1 expressed protein GO:0005634 nucleus C
LOC_Os02g13020.1 expressed protein GO:0008152 metabolic process P
LOC_Os02g13020.1 expressed protein GO:0005515 protein binding F
LOC_Os02g13020.1 expressed protein GO:0006139 nucleobase, nucleoside, nucleotide and nucleic acid metabolic process P
LOC_Os02g13020.1 expressed protein GO:0016740 transferase activity F
LOC_Os02g13060.1 expressed protein GO:0003674 molecular_function F
LOC_Os02g13060.1 expressed protein GO:0005575 cellular_component C
LOC_Os02g13060.1 expressed protein GO:0008150 biological_process P
LOC_Os02g13100.1 protein phosphatase 2C, putative, expressed GO:0005634 nucleus C
LOC_Os02g13100.1 protein phosphatase 2C, putative, expressed GO:0008152 metabolic process P
LOC_Os02g13100.1 protein phosphatase 2C, putative, expressed GO:0009058 biosynthetic process P
LOC_Os02g13100.1 protein phosphatase 2C, putative, expressed GO:0006464 protein modification process P
LOC_Os02g13100.1 protein phosphatase 2C, putative, expressed GO:0009987 cellular process P
LOC_Os02g13100.1 protein phosphatase 2C, putative, expressed GO:0003824 catalytic activity F
LOC_Os02g13100.1 protein phosphatase 2C, putative, expressed GO:0016787 hydrolase activity F
LOC_Os02g13110.2 serine/threonine protein phosphatase 2A 55 kDa regulatory subunit B, putative, expressed GO:0030234 enzyme regulator activity F
LOC_Os02g13110.2 serine/threonine protein phosphatase 2A 55 kDa regulatory subunit B, putative, expressed GO:0000166 nucleotide binding F
LOC_Os02g13110.2 serine/threonine protein phosphatase 2A 55 kDa regulatory subunit B, putative, expressed GO:0005829 cytosol C
LOC_Os02g13110.2 serine/threonine protein phosphatase 2A 55 kDa regulatory subunit B, putative, expressed GO:0006464 protein modification process P
LOC_Os02g13110.2 serine/threonine protein phosphatase 2A 55 kDa regulatory subunit B, putative, expressed GO:0008152 metabolic process P
LOC_Os02g13110.2 serine/threonine protein phosphatase 2A 55 kDa regulatory subunit B, putative, expressed GO:0005622 intracellular C
LOC_Os02g13130.1 KH domain-containing protein, putative, expressed GO:0003723 RNA binding F
LOC_Os02g13130.1 KH domain-containing protein, putative, expressed GO:0005829 cytosol C
LOC_Os02g13130.1 KH domain-containing protein, putative, expressed GO:0003676 nucleic acid binding F
LOC_Os02g13140.1 xaa-Pro dipeptidase, putative, expressed GO:0008152 metabolic process P
LOC_Os02g13140.1 xaa-Pro dipeptidase, putative, expressed GO:0016787 hydrolase activity F
LOC_Os02g13140.1 xaa-Pro dipeptidase, putative, expressed GO:0009987 cellular process P
LOC_Os02g13140.1 xaa-Pro dipeptidase, putative, expressed GO:0005488 binding F
LOC_Os02g13140.1 xaa-Pro dipeptidase, putative, expressed GO:0009536 plastid C
LOC_Os02g13150.1 pollen-specific protein SF21, putative, expressed GO:0003674 molecular_function F
LOC_Os02g13150.1 pollen-specific protein SF21, putative, expressed GO:0030154 cell differentiation P
LOC_Os02g13150.1 pollen-specific protein SF21, putative, expressed GO:0006810 transport P
LOC_Os02g13160.1 F-box protein PP2-A15, putative, expressed GO:0005575 cellular_component C
LOC_Os02g13160.1 F-box protein PP2-A15, putative, expressed GO:0030246 carbohydrate binding F
LOC_Os02g13160.1 F-box protein PP2-A15, putative, expressed GO:0008150 biological_process P
LOC_Os02g13170.1 mitochondrial carrier protein, putative, expressed GO:0006810 transport P
LOC_Os02g13170.1 mitochondrial carrier protein, putative, expressed GO:0016020 membrane C
LOC_Os02g13170.1 mitochondrial carrier protein, putative, expressed GO:0005773 vacuole C
LOC_Os02g13170.1 mitochondrial carrier protein, putative, expressed GO:0009987 cellular process P
LOC_Os02g13170.1 mitochondrial carrier protein, putative, expressed GO:0005739 mitochondrion C
LOC_Os02g13170.1 mitochondrial carrier protein, putative, expressed GO:0005488 binding F
LOC_Os02g13170.1 mitochondrial carrier protein, putative, expressed GO:0005777 peroxisome C
LOC_Os02g13180.1 SKP1, putative, expressed GO:0019538 protein metabolic process P
LOC_Os02g13180.1 SKP1, putative, expressed GO:0009056 catabolic process P
LOC_Os02g13180.1 SKP1, putative, expressed GO:0009987 cellular process P
LOC_Os02g13180.1 SKP1, putative, expressed GO:0005515 protein binding F
LOC_Os02g13180.1 SKP1, putative, expressed GO:0006464 protein modification process P
LOC_Os02g13180.1 SKP1, putative, expressed GO:0005737 cytoplasm C
LOC_Os02g13180.1 SKP1, putative, expressed GO:0000003 reproduction P
LOC_Os02g13180.1 SKP1, putative, expressed GO:0009791 post-embryonic development P
LOC_Os02g13180.1 SKP1, putative, expressed GO:0009790 embryo development P
LOC_Os02g13180.1 SKP1, putative, expressed GO:0005622 intracellular C
LOC_Os02g13180.1 SKP1, putative, expressed GO:0003824 catalytic activity F
LOC_Os02g13200.1 expressed protein GO:0003674 molecular_function F
LOC_Os02g13200.1 expressed protein GO:0005575 cellular_component C
LOC_Os02g13200.1 expressed protein GO:0008150 biological_process P
LOC_Os02g13220.1 F-box family protein, putative, expressed GO:0003674 molecular_function F
LOC_Os02g13220.1 F-box family protein, putative, expressed GO:0008150 biological_process P
LOC_Os02g15810.1 HMG1/2, putative, expressed GO:0005634 nucleus C
LOC_Os02g15810.1 HMG1/2, putative, expressed GO:0009058 biosynthetic process P
LOC_Os02g15810.1 HMG1/2, putative, expressed GO:0006139 nucleobase, nucleoside, nucleotide and nucleic acid metabolic process P
LOC_Os02g15810.1 HMG1/2, putative, expressed GO:0003700 sequence-specific DNA binding transcription factor activity F
LOC_Os02g15810.1 HMG1/2, putative, expressed GO:0009536 plastid C
LOC_Os02g15820.1 extra-large G-protein-related, putative, expressed GO:0003674 molecular_function F
LOC_Os02g15820.1 extra-large G-protein-related, putative, expressed GO:0008150 biological_process P
LOC_Os02g15820.1 extra-large G-protein-related, putative, expressed GO:0005886 plasma membrane C
LOC_Os03g01870.1 no apical meristem protein, putative, expressed GO:0005575 cellular_component C
LOC_Os03g01870.1 no apical meristem protein, putative, expressed GO:0003677 DNA binding F
LOC_Os03g01870.1 no apical meristem protein, putative, expressed GO:0009058 biosynthetic process P
LOC_Os03g01870.1 no apical meristem protein, putative, expressed GO:0006139 nucleobase, nucleoside, nucleotide and nucleic acid metabolic process P
LOC_Os03g01880.1 possible lysine decarboxylase domain containing protein, expressed GO:0003674 molecular_function F
LOC_Os03g01880.1 possible lysine decarboxylase domain containing protein, expressed GO:0005634 nucleus C
LOC_Os03g01880.1 possible lysine decarboxylase domain containing protein, expressed GO:0005829 cytosol C
LOC_Os03g01880.1 possible lysine decarboxylase domain containing protein, expressed GO:0008150 biological_process P
LOC_Os03g01890.1 START domain containing protein, expressed GO:0007275 multicellular organismal development P
LOC_Os03g01890.1 START domain containing protein, expressed GO:0003677 DNA binding F
LOC_Os03g01890.1 START domain containing protein, expressed GO:0005634 nucleus C
LOC_Os03g01890.1 START domain containing protein, expressed GO:0030154 cell differentiation P
LOC_Os03g01890.1 START domain containing protein, expressed GO:0009058 biosynthetic process P
LOC_Os03g01890.1 START domain containing protein, expressed GO:0006139 nucleobase, nucleoside, nucleotide and nucleic acid metabolic process P
LOC_Os03g01890.1 START domain containing protein, expressed GO:0009653 anatomical structure morphogenesis P
LOC_Os03g01890.1 START domain containing protein, expressed GO:0008289 lipid binding F
LOC_Os03g01890.1 START domain containing protein, expressed GO:0003700 sequence-specific DNA binding transcription factor activity F
LOC_Os03g01900.1 40S ribosomal protein S17, putative, expressed GO:0005840 ribosome C
LOC_Os03g01900.1 40S ribosomal protein S17, putative, expressed GO:0016043 cellular component organization P
LOC_Os03g01900.1 40S ribosomal protein S17, putative, expressed GO:0009987 cellular process P
LOC_Os03g01900.1 40S ribosomal protein S17, putative, expressed GO:0006412 translation P
LOC_Os03g01900.1 40S ribosomal protein S17, putative, expressed GO:0005829 cytosol C
LOC_Os03g01900.1 40S ribosomal protein S17, putative, expressed GO:0005198 structural molecule activity F
LOC_Os03g01910.1 transcription factor BTF3, putative, expressed GO:0003674 molecular_function F
LOC_Os03g01910.1 transcription factor BTF3, putative, expressed GO:0006950 response to stress P
LOC_Os03g01910.1 transcription factor BTF3, putative, expressed GO:0009628 response to abiotic stimulus P
LOC_Os03g01920.1 expressed protein GO:0003674 molecular_function F
LOC_Os03g01920.1 expressed protein GO:0008150 biological_process P
LOC_Os03g01920.1 expressed protein GO:0009536 plastid C
LOC_Os03g01960.1 expressed protein GO:0003674 molecular_function F
LOC_Os03g01960.1 expressed protein GO:0008150 biological_process P
LOC_Os03g01970.1 THO complex subunit 1, putative, expressed GO:0003674 molecular_function F
LOC_Os03g01970.1 THO complex subunit 1, putative, expressed GO:0005575 cellular_component C
LOC_Os03g01970.1 THO complex subunit 1, putative, expressed GO:0008152 metabolic process P
LOC_Os03g01970.1 THO complex subunit 1, putative, expressed GO:0009987 cellular process P
LOC_Os03g01970.1 THO complex subunit 1, putative, expressed GO:0040029 regulation of gene expression, epigenetic P
LOC_Os03g01970.1 THO complex subunit 1, putative, expressed GO:0006139 nucleobase, nucleoside, nucleotide and nucleic acid metabolic process P
LOC_Os03g01980.1 KIP1, putative, expressed GO:0003674 molecular_function F
LOC_Os03g01980.1 KIP1, putative, expressed GO:0005575 cellular_component C
LOC_Os03g01980.1 KIP1, putative, expressed GO:0008150 biological_process P
LOC_Os03g01990.1 lysM domain containing protein, putative, expressed GO:0003674 molecular_function F
LOC_Os03g01990.1 lysM domain containing protein, putative, expressed GO:0009056 catabolic process P
LOC_Os03g02010.4 DNA methyltransferase protein, putative, expressed GO:0005634 nucleus C
LOC_Os03g02010.4 DNA methyltransferase protein, putative, expressed GO:0008152 metabolic process P
LOC_Os03g02010.4 DNA methyltransferase protein, putative, expressed GO:0009987 cellular process P
LOC_Os03g02010.4 DNA methyltransferase protein, putative, expressed GO:0016740 transferase activity F
LOC_Os03g02010.4 DNA methyltransferase protein, putative, expressed GO:0016043 cellular component organization P
LOC_Os03g02010.4 DNA methyltransferase protein, putative, expressed GO:0006464 protein modification process P
LOC_Os03g02010.4 DNA methyltransferase protein, putative, expressed GO:0040029 regulation of gene expression, epigenetic P
LOC_Os03g02010.4 DNA methyltransferase protein, putative, expressed GO:0006259 DNA metabolic process P
LOC_Os03g02020.2 stress responsive A/B Barrel domain containing protein, expressed GO:0003674 molecular_function F
LOC_Os03g02020.2 stress responsive A/B Barrel domain containing protein, expressed GO:0008150 biological_process P
LOC_Os03g02030.1 folylpolyglutamate synthase, mitochondrial precursor, putative, expressed GO:0009058 biosynthetic process P
LOC_Os03g02030.1 folylpolyglutamate synthase, mitochondrial precursor, putative, expressed GO:0009987 cellular process P
LOC_Os03g02030.1 folylpolyglutamate synthase, mitochondrial precursor, putative, expressed GO:0008152 metabolic process P
LOC_Os03g02030.1 folylpolyglutamate synthase, mitochondrial precursor, putative, expressed GO:0009653 anatomical structure morphogenesis P
LOC_Os03g02030.1 folylpolyglutamate synthase, mitochondrial precursor, putative, expressed GO:0030154 cell differentiation P
LOC_Os03g02030.1 folylpolyglutamate synthase, mitochondrial precursor, putative, expressed GO:0007275 multicellular organismal development P
LOC_Os03g02030.1 folylpolyglutamate synthase, mitochondrial precursor, putative, expressed GO:0016049 cell growth P
LOC_Os03g02030.1 folylpolyglutamate synthase, mitochondrial precursor, putative, expressed GO:0003824 catalytic activity F
LOC_Os03g02030.1 folylpolyglutamate synthase, mitochondrial precursor, putative, expressed GO:0040007 growth P
LOC_Os03g02030.1 folylpolyglutamate synthase, mitochondrial precursor, putative, expressed GO:0005829 cytosol C
LOC_Os03g02030.1 folylpolyglutamate synthase, mitochondrial precursor, putative, expressed GO:0009536 plastid C
LOC_Os03g02040.1 remorin, putative, expressed GO:0005575 cellular_component C
LOC_Os03g02040.1 remorin, putative, expressed GO:0003677 DNA binding F
LOC_Os03g02040.1 remorin, putative, expressed GO:0008150 biological_process P
LOC_Os03g02050.1 LTPL151 - Protease inhibitor/seed storage/LTP family protein precursor, expressed GO:0005623 cell C
LOC_Os03g02050.1 LTPL151 - Protease inhibitor/seed storage/LTP family protein precursor, expressed GO:0008289 lipid binding F
LOC_Os03g02050.1 LTPL151 - Protease inhibitor/seed storage/LTP family protein precursor, expressed GO:0006810 transport P
LOC_Os03g02070.1 heavy-metal-associated domain-containing protein, putative, expressed GO:0005575 cellular_component C
LOC_Os03g02070.1 heavy-metal-associated domain-containing protein, putative, expressed GO:0005488 binding F
LOC_Os03g02100.1 valyl-tRNA synthetase, putative, expressed GO:0008152 metabolic process P
LOC_Os03g02100.1 valyl-tRNA synthetase, putative, expressed GO:0003824 catalytic activity F
LOC_Os03g02100.1 valyl-tRNA synthetase, putative, expressed GO:0000166 nucleotide binding F
LOC_Os03g02100.1 valyl-tRNA synthetase, putative, expressed GO:0005829 cytosol C
LOC_Os03g02100.1 valyl-tRNA synthetase, putative, expressed GO:0006412 translation P
LOC_Os03g02100.1 valyl-tRNA synthetase, putative, expressed GO:0006139 nucleobase, nucleoside, nucleotide and nucleic acid metabolic process P
LOC_Os03g02100.1 valyl-tRNA synthetase, putative, expressed GO:0005739 mitochondrion C
LOC_Os03g02100.1 valyl-tRNA synthetase, putative, expressed GO:0000003 reproduction P
LOC_Os03g02100.1 valyl-tRNA synthetase, putative, expressed GO:0009791 post-embryonic development P
LOC_Os03g02100.1 valyl-tRNA synthetase, putative, expressed GO:0009790 embryo development P
LOC_Os03g02100.1 valyl-tRNA synthetase, putative, expressed GO:0009536 plastid C
LOC_Os03g02110.1 WD domain, G-beta repeat domain containing protein, expressed GO:0005622 intracellular C
LOC_Os03g02110.1 WD domain, G-beta repeat domain containing protein, expressed GO:0000166 nucleotide binding F
LOC_Os03g02110.1 WD domain, G-beta repeat domain containing protein, expressed GO:0008150 biological_process P
LOC_Os03g02150.1 adapitin protein, putative, expressed GO:0006810 transport P
LOC_Os03g02150.1 adapitin protein, putative, expressed GO:0009987 cellular process P
LOC_Os03g02150.1 adapitin protein, putative, expressed GO:0005515 protein binding F
LOC_Os03g02150.1 adapitin protein, putative, expressed GO:0005215 transporter activity F
LOC_Os03g02150.1 adapitin protein, putative, expressed GO:0005488 binding F
LOC_Os03g02150.1 adapitin protein, putative, expressed GO:0005886 plasma membrane C
LOC_Os03g02160.3 zinc finger C-x8-C-x5-C-x3-H type family protein, expressed GO:0005198 structural molecule activity F
LOC_Os03g02170.1 transmembrane and coiled-coil domain-containing protein 4, putative, expressed GO:0003674 molecular_function F
LOC_Os03g02170.1 transmembrane and coiled-coil domain-containing protein 4, putative, expressed GO:0008150 biological_process P
LOC_Os03g02180.1 cytochrome P450, putative, expressed GO:0005783 endoplasmic reticulum C
LOC_Os03g02180.1 cytochrome P450, putative, expressed GO:0009058 biosynthetic process P
LOC_Os03g02180.1 cytochrome P450, putative, expressed GO:0009987 cellular process P
LOC_Os03g02180.1 cytochrome P450, putative, expressed GO:0019748 secondary metabolic process P
LOC_Os03g02180.1 cytochrome P450, putative, expressed GO:0003824 catalytic activity F
LOC_Os03g02180.1 cytochrome P450, putative, expressed GO:0008152 metabolic process P
LOC_Os03g02180.1 cytochrome P450, putative, expressed GO:0009628 response to abiotic stimulus P
LOC_Os03g02190.1 protein kinase domain containing protein, expressed GO:0005575 cellular_component C
LOC_Os03g02190.1 protein kinase domain containing protein, expressed GO:0008152 metabolic process P
LOC_Os03g02190.1 protein kinase domain containing protein, expressed GO:0009987 cellular process P
LOC_Os03g02190.1 protein kinase domain containing protein, expressed GO:0016301 kinase activity F
LOC_Os03g02190.1 protein kinase domain containing protein, expressed GO:0006464 protein modification process P
LOC_Os03g02200.1 thymidine kinase, putative, expressed GO:0006139 nucleobase, nucleoside, nucleotide and nucleic acid metabolic process P
LOC_Os03g02200.1 thymidine kinase, putative, expressed GO:0009058 biosynthetic process P
LOC_Os03g02200.1 thymidine kinase, putative, expressed GO:0005575 cellular_component C
LOC_Os03g02200.1 thymidine kinase, putative, expressed GO:0008152 metabolic process P
LOC_Os03g02200.1 thymidine kinase, putative, expressed GO:0009987 cellular process P
LOC_Os03g02200.1 thymidine kinase, putative, expressed GO:0000166 nucleotide binding F
LOC_Os03g02200.1 thymidine kinase, putative, expressed GO:0006091 generation of precursor metabolites and energy P
LOC_Os03g02200.1 thymidine kinase, putative, expressed GO:0016301 kinase activity F
LOC_Os03g02240.1 AT-GTL1, putative, expressed GO:0009058 biosynthetic process P
LOC_Os03g02240.1 AT-GTL1, putative, expressed GO:0006139 nucleobase, nucleoside, nucleotide and nucleic acid metabolic process P
LOC_Os03g02240.1 AT-GTL1, putative, expressed GO:0003700 sequence-specific DNA binding transcription factor activity F
LOC_Os03g02260.1 DnaK family protein, putative, expressed GO:0019538 protein metabolic process P
LOC_Os03g02260.1 DnaK family protein, putative, expressed GO:0009987 cellular process P
LOC_Os03g02260.1 DnaK family protein, putative, expressed GO:0005739 mitochondrion C
LOC_Os03g02260.1 DnaK family protein, putative, expressed GO:0000166 nucleotide binding F
LOC_Os03g02260.1 DnaK family protein, putative, expressed GO:0006950 response to stress P
LOC_Os03g02260.1 DnaK family protein, putative, expressed GO:0009628 response to abiotic stimulus P
LOC_Os03g02260.1 DnaK family protein, putative, expressed GO:0016020 membrane C
LOC_Os03g02260.1 DnaK family protein, putative, expressed GO:0005773 vacuole C
LOC_Os03g02260.1 DnaK family protein, putative, expressed GO:0008150 biological_process P
LOC_Os03g02260.1 DnaK family protein, putative, expressed GO:0005618 cell wall C
LOC_Os03g02260.1 DnaK family protein, putative, expressed GO:0009607 response to biotic stimulus P
LOC_Os03g02260.1 DnaK family protein, putative, expressed GO:0009536 plastid C
LOC_Os03g02270.1 expressed protein GO:0006810 transport P
LOC_Os03g02270.1 expressed protein GO:0016043 cellular component organization P
LOC_Os03g02270.1 expressed protein GO:0009987 cellular process P
LOC_Os03g02270.1 expressed protein GO:0005829 cytosol C
LOC_Os03g02270.1 expressed protein GO:0005488 binding F
LOC_Os03g02280.1 DUF584 domain containing protein, putative, expressed GO:0003674 molecular_function F
LOC_Os03g02280.1 DUF584 domain containing protein, putative, expressed GO:0008150 biological_process P
LOC_Os03g02290.1 kinesin motor domain containing protein, putative, expressed GO:0009987 cellular process P
LOC_Os03g02290.1 kinesin motor domain containing protein, putative, expressed GO:0008152 metabolic process P
LOC_Os03g02290.1 kinesin motor domain containing protein, putative, expressed GO:0000166 nucleotide binding F
LOC_Os03g02290.1 kinesin motor domain containing protein, putative, expressed GO:0003774 motor activity F
LOC_Os03g02300.1 expressed protein GO:0003674 molecular_function F
LOC_Os03g02300.1 expressed protein GO:0005575 cellular_component C
LOC_Os03g02300.1 expressed protein GO:0009628 response to abiotic stimulus P
LOC_Os03g02310.1 RNA binding protein, putative, expressed GO:0006412 translation P
LOC_Os03g02310.1 RNA binding protein, putative, expressed GO:0005575 cellular_component C
LOC_Os03g02310.1 RNA binding protein, putative, expressed GO:0008135 translation factor activity, nucleic acid binding F
LOC_Os03g02310.1 RNA binding protein, putative, expressed GO:0003723 RNA binding F
LOC_Os03g02320.1 STE_PAK_Ste20_STLK.3 - STE kinases include homologs to sterile 7, sterile 11 and sterile 20 from yeast, expressed GO:0008152 metabolic process P
LOC_Os03g02320.1 STE_PAK_Ste20_STLK.3 - STE kinases include homologs to sterile 7, sterile 11 and sterile 20 from yeast, expressed GO:0009987 cellular process P
LOC_Os03g02320.1 STE_PAK_Ste20_STLK.3 - STE kinases include homologs to sterile 7, sterile 11 and sterile 20 from yeast, expressed GO:0016301 kinase activity F
LOC_Os03g02320.1 STE_PAK_Ste20_STLK.3 - STE kinases include homologs to sterile 7, sterile 11 and sterile 20 from yeast, expressed GO:0000166 nucleotide binding F
LOC_Os03g02320.1 STE_PAK_Ste20_STLK.3 - STE kinases include homologs to sterile 7, sterile 11 and sterile 20 from yeast, expressed GO:0006464 protein modification process P
LOC_Os03g02320.1 STE_PAK_Ste20_STLK.3 - STE kinases include homologs to sterile 7, sterile 11 and sterile 20 from yeast, expressed GO:0005886 plasma membrane C
LOC_Os03g02330.1 AAA-type ATPase family protein, putative, expressed GO:0005623 cell C
LOC_Os03g02330.1 AAA-type ATPase family protein, putative, expressed GO:0008152 metabolic process P
LOC_Os03g02330.1 AAA-type ATPase family protein, putative, expressed GO:0000166 nucleotide binding F
LOC_Os03g02330.1 AAA-type ATPase family protein, putative, expressed GO:0016787 hydrolase activity F
LOC_Os03g02330.1 AAA-type ATPase family protein, putative, expressed GO:0009056 catabolic process P
LOC_Os03g02330.1 AAA-type ATPase family protein, putative, expressed GO:0006139 nucleobase, nucleoside, nucleotide and nucleic acid metabolic process P
LOC_Os03g02380.1 major facilitator superfamily domain-containing protein 5, putative, expressed GO:0006810 transport P
LOC_Os03g02380.1 major facilitator superfamily domain-containing protein 5, putative, expressed GO:0016020 membrane C
LOC_Os03g02380.1 major facilitator superfamily domain-containing protein 5, putative, expressed GO:0005773 vacuole C
LOC_Os03g02390.1 mitochondrial import inner membrane translocase subunit Tim17, putative, expressed GO:0006810 transport P
LOC_Os03g02390.1 mitochondrial import inner membrane translocase subunit Tim17, putative, expressed GO:0009987 cellular process P
LOC_Os03g02390.1 mitochondrial import inner membrane translocase subunit Tim17, putative, expressed GO:0016043 cellular component organization P
LOC_Os03g02390.1 mitochondrial import inner membrane translocase subunit Tim17, putative, expressed GO:0016020 membrane C
LOC_Os03g02390.1 mitochondrial import inner membrane translocase subunit Tim17, putative, expressed GO:0005739 mitochondrion C
LOC_Os03g02390.1 mitochondrial import inner membrane translocase subunit Tim17, putative, expressed GO:0005215 transporter activity F
LOC_Os03g02400.1 plastocyanin-like domain containing protein, putative, expressed GO:0003674 molecular_function F
LOC_Os03g02400.1 plastocyanin-like domain containing protein, putative, expressed GO:0005488 binding F
LOC_Os03g02400.1 plastocyanin-like domain containing protein, putative, expressed GO:0016020 membrane C
LOC_Os03g02410.1 GHMP kinases ATP-binding protein, putative, expressed GO:0016740 transferase activity F
LOC_Os03g02410.1 GHMP kinases ATP-binding protein, putative, expressed GO:0005975 carbohydrate metabolic process P
LOC_Os03g02410.1 GHMP kinases ATP-binding protein, putative, expressed GO:0009987 cellular process P
LOC_Os03g02410.1 GHMP kinases ATP-binding protein, putative, expressed GO:0008152 metabolic process P
LOC_Os03g02410.1 GHMP kinases ATP-binding protein, putative, expressed GO:0000166 nucleotide binding F
LOC_Os03g02410.1 GHMP kinases ATP-binding protein, putative, expressed GO:0016301 kinase activity F
LOC_Os03g02410.1 GHMP kinases ATP-binding protein, putative, expressed GO:0006139 nucleobase, nucleoside, nucleotide and nucleic acid metabolic process P
LOC_Os03g02410.1 GHMP kinases ATP-binding protein, putative, expressed GO:0009058 biosynthetic process P
LOC_Os03g02410.1 GHMP kinases ATP-binding protein, putative, expressed GO:0005737 cytoplasm C
LOC_Os03g02420.1 KH domain containing protein, putative, expressed GO:0005575 cellular_component C
LOC_Os03g02420.1 KH domain containing protein, putative, expressed GO:0003723 RNA binding F
LOC_Os03g02430.1 PPR repeat domain containing protein, putative, expressed GO:0003674 molecular_function F
LOC_Os03g02430.1 PPR repeat domain containing protein, putative, expressed GO:0005730 nucleolus C
LOC_Os03g02430.1 PPR repeat domain containing protein, putative, expressed GO:0009058 biosynthetic process P
LOC_Os03g02430.1 PPR repeat domain containing protein, putative, expressed GO:0009987 cellular process P
LOC_Os03g02440.1 WD repeat-containing protein 44, putative, expressed GO:0007165 signal transduction P
LOC_Os03g02440.1 WD repeat-containing protein 44, putative, expressed GO:0005622 intracellular C
LOC_Os03g02440.1 WD repeat-containing protein 44, putative, expressed GO:0005886 plasma membrane C
LOC_Os03g02440.1 WD repeat-containing protein 44, putative, expressed GO:0004871 signal transducer activity F
LOC_Os03g02450.1 pyridoxamine 5'-phosphate oxidase family protein, putative, expressed GO:0003824 catalytic activity F
LOC_Os03g02450.1 pyridoxamine 5'-phosphate oxidase family protein, putative, expressed GO:0009058 biosynthetic process P
LOC_Os03g02450.1 pyridoxamine 5'-phosphate oxidase family protein, putative, expressed GO:0009987 cellular process P
LOC_Os03g02450.1 pyridoxamine 5'-phosphate oxidase family protein, putative, expressed GO:0000166 nucleotide binding F
LOC_Os03g02450.1 pyridoxamine 5'-phosphate oxidase family protein, putative, expressed GO:0008152 metabolic process P
LOC_Os03g02460.1 retinol dehydrogenase, putative, expressed GO:0008152 metabolic process P
LOC_Os03g02460.1 retinol dehydrogenase, putative, expressed GO:0003824 catalytic activity F
LOC_Os03g02460.1 retinol dehydrogenase, putative, expressed GO:0005488 binding F
LOC_Os03g02480.1 inner membrane protein, putative, expressed GO:0003674 molecular_function F
LOC_Os03g02480.1 inner membrane protein, putative, expressed GO:0016020 membrane C
LOC_Os03g02480.1 inner membrane protein, putative, expressed GO:0005739 mitochondrion C
LOC_Os03g02480.1 inner membrane protein, putative, expressed GO:0006810 transport P
LOC_Os03g02480.1 inner membrane protein, putative, expressed GO:0016043 cellular component organization P
LOC_Os03g02480.1 inner membrane protein, putative, expressed GO:0009987 cellular process P
LOC_Os03g02514.1 hydrolase, alpha/beta fold family protein, putative, expressed GO:0005783 endoplasmic reticulum C
LOC_Os03g02514.1 hydrolase, alpha/beta fold family protein, putative, expressed GO:0008152 metabolic process P
LOC_Os03g02514.1 hydrolase, alpha/beta fold family protein, putative, expressed GO:0016787 hydrolase activity F
LOC_Os03g02514.1 hydrolase, alpha/beta fold family protein, putative, expressed GO:0008150 biological_process P
LOC_Os03g02530.1 OsRhmbd7 - Putative Rhomboid homologue, expressed GO:0016787 hydrolase activity F
LOC_Os03g02530.1 OsRhmbd7 - Putative Rhomboid homologue, expressed GO:0008152 metabolic process P
LOC_Os03g02530.1 OsRhmbd7 - Putative Rhomboid homologue, expressed GO:0005575 cellular_component C
LOC_Os03g02530.1 OsRhmbd7 - Putative Rhomboid homologue, expressed GO:0005794 Golgi apparatus C
LOC_Os03g02540.1 proteasome subunit, putative, expressed GO:0006464 protein modification process P
LOC_Os03g02540.1 proteasome subunit, putative, expressed GO:0005634 nucleus C
LOC_Os03g02540.1 proteasome subunit, putative, expressed GO:0009791 post-embryonic development P
LOC_Os03g02540.1 proteasome subunit, putative, expressed GO:0009628 response to abiotic stimulus P
LOC_Os03g02540.1 proteasome subunit, putative, expressed GO:0003674 molecular_function F
LOC_Os03g02540.1 proteasome subunit, putative, expressed GO:0006950 response to stress P
LOC_Os03g02540.1 proteasome subunit, putative, expressed GO:0005515 protein binding F
LOC_Os03g02540.1 proteasome subunit, putative, expressed GO:0005829 cytosol C
LOC_Os03g02540.1 proteasome subunit, putative, expressed GO:0016043 cellular component organization P
LOC_Os03g02540.1 proteasome subunit, putative, expressed GO:0000003 reproduction P
LOC_Os03g02540.1 proteasome subunit, putative, expressed GO:0009790 embryo development P
LOC_Os03g02550.1 OsFBX76 - F-box domain containing protein, expressed GO:0006950 response to stress P
LOC_Os03g02550.1 OsFBX76 - F-box domain containing protein, expressed GO:0030246 carbohydrate binding F
LOC_Os03g02550.1 OsFBX76 - F-box domain containing protein, expressed GO:0005515 protein binding F
LOC_Os03g02550.1 OsFBX76 - F-box domain containing protein, expressed GO:0009058 biosynthetic process P
LOC_Os03g02550.1 OsFBX76 - F-box domain containing protein, expressed GO:0006464 protein modification process P
LOC_Os03g02560.1 cyclin-like F-box, putative, expressed GO:0003674 molecular_function F
LOC_Os03g02560.1 cyclin-like F-box, putative, expressed GO:0008150 biological_process P
LOC_Os03g02570.1 dihydrodipicolinate reductase, putative, expressed GO:0006091 generation of precursor metabolites and energy P
LOC_Os03g02570.1 dihydrodipicolinate reductase, putative, expressed GO:0015979 photosynthesis P
LOC_Os03g02570.1 dihydrodipicolinate reductase, putative, expressed GO:0009058 biosynthetic process P
LOC_Os03g02570.1 dihydrodipicolinate reductase, putative, expressed GO:0009987 cellular process P
LOC_Os03g02570.1 dihydrodipicolinate reductase, putative, expressed GO:0008152 metabolic process P
LOC_Os03g02570.1 dihydrodipicolinate reductase, putative, expressed GO:0003824 catalytic activity F
LOC_Os03g02570.1 dihydrodipicolinate reductase, putative, expressed GO:0009536 plastid C
LOC_Os03g02580.1 armadillo, putative, expressed GO:0008150 biological_process P
LOC_Os03g02580.1 armadillo, putative, expressed GO:0005488 binding F
LOC_Os03g02590.2 peroxisomal biogenesis factor 11, putative, expressed GO:0016043 cellular component organization P
LOC_Os03g02590.2 peroxisomal biogenesis factor 11, putative, expressed GO:0009987 cellular process P
LOC_Os03g02590.2 peroxisomal biogenesis factor 11, putative, expressed GO:0005575 cellular_component C
LOC_Os03g02590.2 peroxisomal biogenesis factor 11, putative, expressed GO:0005515 protein binding F
LOC_Os03g02590.2 peroxisomal biogenesis factor 11, putative, expressed GO:0005777 peroxisome C
LOC_Os03g02590.2 peroxisomal biogenesis factor 11, putative, expressed GO:0016020 membrane C
LOC_Os03g02590.2 peroxisomal biogenesis factor 11, putative, expressed GO:0003674 molecular_function F
LOC_Os03g02600.1 riboflavin biosynthesis protein ribD, putative, expressed GO:0016787 hydrolase activity F
LOC_Os03g02600.1 riboflavin biosynthesis protein ribD, putative, expressed GO:0008152 metabolic process P
LOC_Os03g02600.1 riboflavin biosynthesis protein ribD, putative, expressed GO:0005488 binding F
LOC_Os03g02600.1 riboflavin biosynthesis protein ribD, putative, expressed GO:0009058 biosynthetic process P
LOC_Os03g02600.1 riboflavin biosynthesis protein ribD, putative, expressed GO:0009987 cellular process P
LOC_Os03g02600.1 riboflavin biosynthesis protein ribD, putative, expressed GO:0009536 plastid C
LOC_Os03g02610.1 glycosyl hydrolases family 16 protein, protein, expressed GO:0005623 cell C
LOC_Os03g02610.1 glycosyl hydrolases family 16 protein, protein, expressed GO:0005576 extracellular region C
LOC_Os03g02610.1 glycosyl hydrolases family 16 protein, protein, expressed GO:0016740 transferase activity F
LOC_Os03g02610.1 glycosyl hydrolases family 16 protein, protein, expressed GO:0008152 metabolic process P
LOC_Os03g02610.1 glycosyl hydrolases family 16 protein, protein, expressed GO:0005618 cell wall C
LOC_Os03g02610.1 glycosyl hydrolases family 16 protein, protein, expressed GO:0008150 biological_process P
LOC_Os03g02610.1 glycosyl hydrolases family 16 protein, protein, expressed GO:0016787 hydrolase activity F
LOC_Os03g02640.1 methylthioribose kinase, putative, expressed GO:0008152 metabolic process P
LOC_Os03g02640.1 methylthioribose kinase, putative, expressed GO:0009987 cellular process P
LOC_Os03g02640.1 methylthioribose kinase, putative, expressed GO:0016301 kinase activity F
LOC_Os03g02640.1 methylthioribose kinase, putative, expressed GO:0005739 mitochondrion C
LOC_Os03g02640.1 methylthioribose kinase, putative, expressed GO:0008150 biological_process P
LOC_Os03g02640.1 methylthioribose kinase, putative, expressed GO:0009536 plastid C
LOC_Os03g02670.2 transporter family protein, putative, expressed GO:0003674 molecular_function F
LOC_Os03g02670.2 transporter family protein, putative, expressed GO:0006810 transport P
LOC_Os03g02670.2 transporter family protein, putative, expressed GO:0009987 cellular process P
LOC_Os03g03000.1 helix-loop-helix DNA-binding domain containing protein, expressed GO:0003677 DNA binding F
LOC_Os03g03000.1 helix-loop-helix DNA-binding domain containing protein, expressed GO:0005634 nucleus C
LOC_Os03g03000.1 helix-loop-helix DNA-binding domain containing protein, expressed GO:0009058 biosynthetic process P
LOC_Os03g03000.1 helix-loop-helix DNA-binding domain containing protein, expressed GO:0006139 nucleobase, nucleoside, nucleotide and nucleic acid metabolic process P
LOC_Os03g03000.1 helix-loop-helix DNA-binding domain containing protein, expressed GO:0003700 sequence-specific DNA binding transcription factor activity F
LOC_Os03g03020.1 L11 domain containing ribosomal protein, putative, expressed GO:0005840 ribosome C
LOC_Os03g03020.1 L11 domain containing ribosomal protein, putative, expressed GO:0016020 membrane C
LOC_Os03g03020.1 L11 domain containing ribosomal protein, putative, expressed GO:0005829 cytosol C
LOC_Os03g03020.1 L11 domain containing ribosomal protein, putative, expressed GO:0009987 cellular process P
LOC_Os03g03020.1 L11 domain containing ribosomal protein, putative, expressed GO:0006412 translation P
LOC_Os03g03020.1 L11 domain containing ribosomal protein, putative, expressed GO:0005198 structural molecule activity F
LOC_Os03g03020.1 L11 domain containing ribosomal protein, putative, expressed GO:0009536 plastid C
LOC_Os03g03034.1 flavonol synthase/flavanone 3-hydroxylase, putative, expressed GO:0005575 cellular_component C
LOC_Os03g03034.1 flavonol synthase/flavanone 3-hydroxylase, putative, expressed GO:0009607 response to biotic stimulus P
LOC_Os03g03034.1 flavonol synthase/flavanone 3-hydroxylase, putative, expressed GO:0009058 biosynthetic process P
LOC_Os03g03034.1 flavonol synthase/flavanone 3-hydroxylase, putative, expressed GO:0009987 cellular process P
LOC_Os03g03034.1 flavonol synthase/flavanone 3-hydroxylase, putative, expressed GO:0019748 secondary metabolic process P
LOC_Os03g03034.1 flavonol synthase/flavanone 3-hydroxylase, putative, expressed GO:0003824 catalytic activity F
LOC_Os03g03034.1 flavonol synthase/flavanone 3-hydroxylase, putative, expressed GO:0008152 metabolic process P
LOC_Os03g03070.1 transcription factor, putative, expressed GO:0005634 nucleus C
LOC_Os03g03070.1 transcription factor, putative, expressed GO:0007275 multicellular organismal development P
LOC_Os03g03070.1 transcription factor, putative, expressed GO:0005515 protein binding F
LOC_Os03g03070.1 transcription factor, putative, expressed GO:0009058 biosynthetic process P
LOC_Os03g03070.1 transcription factor, putative, expressed GO:0006139 nucleobase, nucleoside, nucleotide and nucleic acid metabolic process P
LOC_Os03g03070.1 transcription factor, putative, expressed GO:0006950 response to stress P
LOC_Os03g03070.1 transcription factor, putative, expressed GO:0009628 response to abiotic stimulus P
LOC_Os03g03070.1 transcription factor, putative, expressed GO:0003700 sequence-specific DNA binding transcription factor activity F
LOC_Os03g03100.1 OsMADS50 - MADS-box family gene with MIKCc type-box, expressed GO:0003677 DNA binding F
LOC_Os03g03100.1 OsMADS50 - MADS-box family gene with MIKCc type-box, expressed GO:0005634 nucleus C
LOC_Os03g03100.1 OsMADS50 - MADS-box family gene with MIKCc type-box, expressed GO:0005515 protein binding F
LOC_Os03g03100.1 OsMADS50 - MADS-box family gene with MIKCc type-box, expressed GO:0009058 biosynthetic process P
LOC_Os03g03100.1 OsMADS50 - MADS-box family gene with MIKCc type-box, expressed GO:0006139 nucleobase, nucleoside, nucleotide and nucleic acid metabolic process P
LOC_Os03g03100.1 OsMADS50 - MADS-box family gene with MIKCc type-box, expressed GO:0003700 sequence-specific DNA binding transcription factor activity F
LOC_Os03g03130.1 ubiquitin-conjugating enzyme, putative, expressed GO:0006464 protein modification process P
LOC_Os03g03130.1 ubiquitin-conjugating enzyme, putative, expressed GO:0005634 nucleus C
LOC_Os03g03130.1 ubiquitin-conjugating enzyme, putative, expressed GO:0005515 protein binding F
LOC_Os03g03130.1 ubiquitin-conjugating enzyme, putative, expressed GO:0000003 reproduction P
LOC_Os03g03130.1 ubiquitin-conjugating enzyme, putative, expressed GO:0009791 post-embryonic development P
LOC_Os03g03130.1 ubiquitin-conjugating enzyme, putative, expressed GO:0009790 embryo development P
LOC_Os03g03130.1 ubiquitin-conjugating enzyme, putative, expressed GO:0009719 response to endogenous stimulus P
LOC_Os03g03130.1 ubiquitin-conjugating enzyme, putative, expressed GO:0003824 catalytic activity F
LOC_Os03g03770.1 expressed protein GO:0003824 catalytic activity F
LOC_Os03g03770.1 expressed protein GO:0008152 metabolic process P
LOC_Os03g03770.1 expressed protein GO:0016020 membrane C
LOC_Os03g03770.1 expressed protein GO:0005739 mitochondrion C
LOC_Os03g03770.1 expressed protein GO:0006091 generation of precursor metabolites and energy P
LOC_Os03g03770.1 expressed protein GO:0009058 biosynthetic process P
LOC_Os03g03770.1 expressed protein GO:0009987 cellular process P
LOC_Os03g03790.1 AMP-binding domain containing protein, expressed GO:0008152 metabolic process P
LOC_Os03g03790.1 AMP-binding domain containing protein, expressed GO:0003824 catalytic activity F
LOC_Os03g03810.1 DEF8 - Defensin and Defensin-like DEFL family, expressed GO:0008152 metabolic process P
LOC_Os03g03810.1 DEF8 - Defensin and Defensin-like DEFL family, expressed GO:0005618 cell wall C
LOC_Os03g03810.1 DEF8 - Defensin and Defensin-like DEFL family, expressed GO:0006950 response to stress P
LOC_Os03g03810.1 DEF8 - Defensin and Defensin-like DEFL family, expressed GO:0005886 plasma membrane C
LOC_Os03g03810.1 DEF8 - Defensin and Defensin-like DEFL family, expressed GO:0030234 enzyme regulator activity F
LOC_Os03g03820.1 adenylate kinase, putative, expressed GO:0009058 biosynthetic process P
LOC_Os03g03820.1 adenylate kinase, putative, expressed GO:0009987 cellular process P
LOC_Os03g03820.1 adenylate kinase, putative, expressed GO:0005634 nucleus C
LOC_Os03g03820.1 adenylate kinase, putative, expressed GO:0007275 multicellular organismal development P
LOC_Os03g03820.1 adenylate kinase, putative, expressed GO:0016301 kinase activity F
LOC_Os03g03820.1 adenylate kinase, putative, expressed GO:0005737 cytoplasm C
LOC_Os03g03820.1 adenylate kinase, putative, expressed GO:0006139 nucleobase, nucleoside, nucleotide and nucleic acid metabolic process P
LOC_Os03g03820.1 adenylate kinase, putative, expressed GO:0009536 plastid C
LOC_Os03g03830.1 EF hand family protein, putative, expressed GO:0005488 binding F
LOC_Os03g03830.1 EF hand family protein, putative, expressed GO:0005886 plasma membrane C
LOC_Os03g03850.1 GATA zinc finger domain containing protein, expressed GO:0008150 biological_process P
LOC_Os03g03850.1 GATA zinc finger domain containing protein, expressed GO:0009058 biosynthetic process P
LOC_Os03g03850.1 GATA zinc finger domain containing protein, expressed GO:0006139 nucleobase, nucleoside, nucleotide and nucleic acid metabolic process P
LOC_Os03g03850.1 GATA zinc finger domain containing protein, expressed GO:0009628 response to abiotic stimulus P
LOC_Os03g03850.1 GATA zinc finger domain containing protein, expressed GO:0003700 sequence-specific DNA binding transcription factor activity F
LOC_Os03g03860.1 expressed protein GO:0003674 molecular_function F
LOC_Os03g03860.1 expressed protein GO:0005575 cellular_component C
LOC_Os03g03860.1 expressed protein GO:0008150 biological_process P
LOC_Os03g03870.1 DNA-binding bromodomain-containing protein, putative, expressed GO:0005575 cellular_component C
LOC_Os03g03870.1 DNA-binding bromodomain-containing protein, putative, expressed GO:0003677 DNA binding F
LOC_Os03g03870.1 DNA-binding bromodomain-containing protein, putative, expressed GO:0008150 biological_process P
LOC_Os03g03880.1 protein kinase, putative, expressed GO:0005575 cellular_component C
LOC_Os03g03880.1 protein kinase, putative, expressed GO:0016301 kinase activity F
LOC_Os03g03880.1 protein kinase, putative, expressed GO:0000166 nucleotide binding F
LOC_Os03g03880.1 protein kinase, putative, expressed GO:0006464 protein modification process P
LOC_Os03g03890.1 protein kinase family protein, putative, expressed GO:0008152 metabolic process P
LOC_Os03g03890.1 protein kinase family protein, putative, expressed GO:0009987 cellular process P
LOC_Os03g03890.1 protein kinase family protein, putative, expressed GO:0016301 kinase activity F
LOC_Os03g03890.1 protein kinase family protein, putative, expressed GO:0000166 nucleotide binding F
LOC_Os03g03890.1 protein kinase family protein, putative, expressed GO:0006464 protein modification process P
LOC_Os03g03890.1 protein kinase family protein, putative, expressed GO:0009536 plastid C
LOC_Os03g03900.1 NIN, putative, expressed GO:0008150 biological_process P
LOC_Os03g03900.1 NIN, putative, expressed GO:0009058 biosynthetic process P
LOC_Os03g03900.1 NIN, putative, expressed GO:0006139 nucleobase, nucleoside, nucleotide and nucleic acid metabolic process P
LOC_Os03g03900.1 NIN, putative, expressed GO:0003700 sequence-specific DNA binding transcription factor activity F
LOC_Os03g03910.1 catalase domain containing protein, expressed GO:0009628 response to abiotic stimulus P
LOC_Os03g03910.1 catalase domain containing protein, expressed GO:0005777 peroxisome C
LOC_Os03g03910.1 catalase domain containing protein, expressed GO:0008152 metabolic process P
LOC_Os03g03910.1 catalase domain containing protein, expressed GO:0019725 cellular homeostasis P
LOC_Os03g03910.1 catalase domain containing protein, expressed GO:0009991 response to extracellular stimulus P
LOC_Os03g03910.1 catalase domain containing protein, expressed GO:0007154 cell communication P
LOC_Os03g03910.1 catalase domain containing protein, expressed GO:0006950 response to stress P
LOC_Os03g03910.1 catalase domain containing protein, expressed GO:0003824 catalytic activity F
LOC_Os03g03910.1 catalase domain containing protein, expressed GO:0005515 protein binding F
LOC_Os03g03910.1 catalase domain containing protein, expressed GO:0005739 mitochondrion C
LOC_Os03g03910.1 catalase domain containing protein, expressed GO:0009536 plastid C
LOC_Os03g03910.1 catalase domain containing protein, expressed GO:0008219 cell death P
LOC_Os03g03910.1 catalase domain containing protein, expressed GO:0005488 binding F
LOC_Os03g03910.1 catalase domain containing protein, expressed GO:0009056 catabolic process P
LOC_Os03g03910.1 catalase domain containing protein, expressed GO:0009987 cellular process P
LOC_Os03g03910.1 catalase domain containing protein, expressed GO:0005840 ribosome C
LOC_Os03g03910.1 catalase domain containing protein, expressed GO:0005829 cytosol C
LOC_Os03g03920.1 Ubiquitin family domain containing protein, expressed GO:0003674 molecular_function F
LOC_Os03g03930.1 tRNA nucleotidyltransferase/polyA polymerase family protein, putative, expressed GO:0006139 nucleobase, nucleoside, nucleotide and nucleic acid metabolic process P
LOC_Os03g03930.1 tRNA nucleotidyltransferase/polyA polymerase family protein, putative, expressed GO:0003723 RNA binding F
LOC_Os03g03930.1 tRNA nucleotidyltransferase/polyA polymerase family protein, putative, expressed GO:0016740 transferase activity F
LOC_Os03g03930.1 tRNA nucleotidyltransferase/polyA polymerase family protein, putative, expressed GO:0009536 plastid C
LOC_Os03g03949.2 electron carrier/ protein disulfide oxidoreductase, putative, expressed GO:0009536 plastid C
LOC_Os03g03949.2 electron carrier/ protein disulfide oxidoreductase, putative, expressed GO:0008152 metabolic process P
LOC_Os03g03949.2 electron carrier/ protein disulfide oxidoreductase, putative, expressed GO:0003824 catalytic activity F
LOC_Os03g03980.1 coiled-coil domain-containing protein 124, putative, expressed GO:0003674 molecular_function F
LOC_Os03g03980.1 coiled-coil domain-containing protein 124, putative, expressed GO:0008150 biological_process P
LOC_Os03g03990.1 signal recognition particle 43 kDa protein, chloroplast precursor, putative, expressed GO:0009628 response to abiotic stimulus P
LOC_Os03g03990.1 signal recognition particle 43 kDa protein, chloroplast precursor, putative, expressed GO:0016020 membrane C
LOC_Os03g03990.1 signal recognition particle 43 kDa protein, chloroplast precursor, putative, expressed GO:0009536 plastid C
LOC_Os03g03990.1 signal recognition particle 43 kDa protein, chloroplast precursor, putative, expressed GO:0009579 thylakoid C
LOC_Os03g03990.1 signal recognition particle 43 kDa protein, chloroplast precursor, putative, expressed GO:0005515 protein binding F
LOC_Os03g03990.1 signal recognition particle 43 kDa protein, chloroplast precursor, putative, expressed GO:0003682 chromatin binding F
LOC_Os03g03990.1 signal recognition particle 43 kDa protein, chloroplast precursor, putative, expressed GO:0005737 cytoplasm C
LOC_Os03g03990.1 signal recognition particle 43 kDa protein, chloroplast precursor, putative, expressed GO:0006810 transport P
LOC_Os03g03990.1 signal recognition particle 43 kDa protein, chloroplast precursor, putative, expressed GO:0009987 cellular process P
LOC_Os03g04000.1 AMP-binding domain containing protein, expressed GO:0006950 response to stress P
LOC_Os03g04000.1 AMP-binding domain containing protein, expressed GO:0003824 catalytic activity F
LOC_Os03g04000.1 AMP-binding domain containing protein, expressed GO:0009058 biosynthetic process P
LOC_Os03g04000.1 AMP-binding domain containing protein, expressed GO:0009987 cellular process P
LOC_Os03g04000.1 AMP-binding domain containing protein, expressed GO:0006629 lipid metabolic process P
LOC_Os03g04000.1 AMP-binding domain containing protein, expressed GO:0019748 secondary metabolic process P
LOC_Os03g04000.1 AMP-binding domain containing protein, expressed GO:0005777 peroxisome C
LOC_Os03g04020.1 expansin precursor, putative, expressed GO:0016043 cellular component organization P
LOC_Os03g04020.1 expansin precursor, putative, expressed GO:0009653 anatomical structure morphogenesis P
LOC_Os03g04020.1 expansin precursor, putative, expressed GO:0016049 cell growth P
LOC_Os03g04020.1 expansin precursor, putative, expressed GO:0005618 cell wall C
LOC_Os03g04020.1 expansin precursor, putative, expressed GO:0005575 cellular_component C
LOC_Os03g04020.1 expansin precursor, putative, expressed GO:0009987 cellular process P
LOC_Os03g04030.1 HVA22, putative, expressed GO:0003674 molecular_function F
LOC_Os03g04030.1 HVA22, putative, expressed GO:0008150 biological_process P
LOC_Os03g04040.1 expressed protein GO:0003674 molecular_function F
LOC_Os03g04040.1 expressed protein GO:0009536 plastid C
LOC_Os03g04050.1 protein kinase family protein, putative, expressed GO:0016020 membrane C
LOC_Os03g04050.1 protein kinase family protein, putative, expressed GO:0008152 metabolic process P
LOC_Os03g04050.1 protein kinase family protein, putative, expressed GO:0009987 cellular process P
LOC_Os03g04050.1 protein kinase family protein, putative, expressed GO:0000166 nucleotide binding F
LOC_Os03g04050.1 protein kinase family protein, putative, expressed GO:0005575 cellular_component C
LOC_Os03g04050.1 protein kinase family protein, putative, expressed GO:0009058 biosynthetic process P
LOC_Os03g04050.1 protein kinase family protein, putative, expressed GO:0006464 protein modification process P
LOC_Os03g04050.1 protein kinase family protein, putative, expressed GO:0016301 kinase activity F
LOC_Os03g04050.1 protein kinase family protein, putative, expressed GO:0009719 response to endogenous stimulus P
LOC_Os03g04050.1 protein kinase family protein, putative, expressed GO:0007165 signal transduction P
LOC_Os03g04050.1 protein kinase family protein, putative, expressed GO:0005488 binding F
LOC_Os03g04050.1 protein kinase family protein, putative, expressed GO:0005773 vacuole C
LOC_Os03g04050.1 protein kinase family protein, putative, expressed GO:0005515 protein binding F
LOC_Os03g04050.1 protein kinase family protein, putative, expressed GO:0005886 plasma membrane C
LOC_Os03g04060.1 CHIT16 - Chitinase family protein precursor, expressed GO:0006950 response to stress P
LOC_Os03g04060.1 CHIT16 - Chitinase family protein precursor, expressed GO:0009607 response to biotic stimulus P
LOC_Os03g04060.1 CHIT16 - Chitinase family protein precursor, expressed GO:0008152 metabolic process P
LOC_Os03g04060.1 CHIT16 - Chitinase family protein precursor, expressed GO:0005773 vacuole C
LOC_Os03g04060.1 CHIT16 - Chitinase family protein precursor, expressed GO:0016020 membrane C
LOC_Os03g04060.1 CHIT16 - Chitinase family protein precursor, expressed GO:0008150 biological_process P
LOC_Os03g04060.1 CHIT16 - Chitinase family protein precursor, expressed GO:0005829 cytosol C
LOC_Os03g04060.1 CHIT16 - Chitinase family protein precursor, expressed GO:0007165 signal transduction P
LOC_Os03g04060.1 CHIT16 - Chitinase family protein precursor, expressed GO:0009719 response to endogenous stimulus P
LOC_Os03g04060.1 CHIT16 - Chitinase family protein precursor, expressed GO:0016787 hydrolase activity F
LOC_Os03g04070.1 no apical meristem protein, putative, expressed GO:0016043 cellular component organization P
LOC_Os03g04070.1 no apical meristem protein, putative, expressed GO:0005575 cellular_component C
LOC_Os03g04070.1 no apical meristem protein, putative, expressed GO:0008150 biological_process P
LOC_Os03g04070.1 no apical meristem protein, putative, expressed GO:0009058 biosynthetic process P
LOC_Os03g04070.1 no apical meristem protein, putative, expressed GO:0006139 nucleobase, nucleoside, nucleotide and nucleic acid metabolic process P
LOC_Os03g04070.1 no apical meristem protein, putative, expressed GO:0007275 multicellular organismal development P
LOC_Os03g04070.1 no apical meristem protein, putative, expressed GO:0009653 anatomical structure morphogenesis P
LOC_Os03g04070.1 no apical meristem protein, putative, expressed GO:0003700 sequence-specific DNA binding transcription factor activity F
LOC_Os03g04070.1 no apical meristem protein, putative, expressed GO:0000003 reproduction P
LOC_Os03g04070.1 no apical meristem protein, putative, expressed GO:0009791 post-embryonic development P
LOC_Os03g04080.1 expressed protein GO:0003674 molecular_function F
LOC_Os03g04080.1 expressed protein GO:0005575 cellular_component C
LOC_Os03g04080.1 expressed protein GO:0008150 biological_process P
LOC_Os03g04100.1 expressed protein GO:0003674 molecular_function F
LOC_Os03g04100.1 expressed protein GO:0005575 cellular_component C
LOC_Os03g04100.1 expressed protein GO:0008150 biological_process P
LOC_Os03g04110.1 lysM domain-containing GPI-anchored protein precursor, putative, expressed GO:0003674 molecular_function F
LOC_Os03g04110.1 lysM domain-containing GPI-anchored protein precursor, putative, expressed GO:0005575 cellular_component C
LOC_Os03g04110.1 lysM domain-containing GPI-anchored protein precursor, putative, expressed GO:0009056 catabolic process P
LOC_Os03g04110.1 lysM domain-containing GPI-anchored protein precursor, putative, expressed GO:0005886 plasma membrane C
LOC_Os03g04110.1 lysM domain-containing GPI-anchored protein precursor, putative, expressed GO:0016020 membrane C
LOC_Os03g04120.1 AMP-binding enzyme, putative, expressed GO:0008152 metabolic process P
LOC_Os03g04120.1 AMP-binding enzyme, putative, expressed GO:0000166 nucleotide binding F
LOC_Os03g04120.1 AMP-binding enzyme, putative, expressed GO:0005777 peroxisome C
LOC_Os03g04130.1 AMP-binding domain containing protein, expressed GO:0008152 metabolic process P
LOC_Os03g04130.1 AMP-binding domain containing protein, expressed GO:0000166 nucleotide binding F
LOC_Os03g04130.1 AMP-binding domain containing protein, expressed GO:0005777 peroxisome C
LOC_Os03g04140.1 serine acetyltransferase protein, putative, expressed GO:0008152 metabolic process P
LOC_Os03g04140.1 serine acetyltransferase protein, putative, expressed GO:0009987 cellular process P
LOC_Os03g04140.1 serine acetyltransferase protein, putative, expressed GO:0016740 transferase activity F
LOC_Os03g04140.1 serine acetyltransferase protein, putative, expressed GO:0005829 cytosol C
LOC_Os04g46220.1 ethylene-responsive transcription factor, putative, expressed GO:0003677 DNA binding F
LOC_Os04g46220.1 ethylene-responsive transcription factor, putative, expressed GO:0016020 membrane C
LOC_Os04g46220.1 ethylene-responsive transcription factor, putative, expressed GO:0005635 nuclear envelope C
LOC_Os04g46220.1 ethylene-responsive transcription factor, putative, expressed GO:0008150 biological_process P
LOC_Os04g46220.1 ethylene-responsive transcription factor, putative, expressed GO:0009058 biosynthetic process P
LOC_Os04g46220.1 ethylene-responsive transcription factor, putative, expressed GO:0006139 nucleobase, nucleoside, nucleotide and nucleic acid metabolic process P
LOC_Os04g46220.1 ethylene-responsive transcription factor, putative, expressed GO:0003700 sequence-specific DNA binding transcription factor activity F
LOC_Os04g46240.1 AP2 domain containing protein, expressed GO:0006950 response to stress P
LOC_Os04g46240.1 AP2 domain containing protein, expressed GO:0009607 response to biotic stimulus P
LOC_Os04g46240.1 AP2 domain containing protein, expressed GO:0003677 DNA binding F
LOC_Os04g46240.1 AP2 domain containing protein, expressed GO:0005634 nucleus C
LOC_Os04g46240.1 AP2 domain containing protein, expressed GO:0005515 protein binding F
LOC_Os04g46240.1 AP2 domain containing protein, expressed GO:0009058 biosynthetic process P
LOC_Os04g46240.1 AP2 domain containing protein, expressed GO:0006139 nucleobase, nucleoside, nucleotide and nucleic acid metabolic process P
LOC_Os04g46240.1 AP2 domain containing protein, expressed GO:0003700 sequence-specific DNA binding transcription factor activity F
LOC_Os04g46250.1 AP2 domain containing protein, expressed GO:0003677 DNA binding F
LOC_Os04g46250.1 AP2 domain containing protein, expressed GO:0005634 nucleus C
LOC_Os04g46250.1 AP2 domain containing protein, expressed GO:0009719 response to endogenous stimulus P
LOC_Os04g46250.1 AP2 domain containing protein, expressed GO:0007165 signal transduction P
LOC_Os04g46250.1 AP2 domain containing protein, expressed GO:0009058 biosynthetic process P
LOC_Os04g46250.1 AP2 domain containing protein, expressed GO:0006139 nucleobase, nucleoside, nucleotide and nucleic acid metabolic process P
LOC_Os04g46250.1 AP2 domain containing protein, expressed GO:0006950 response to stress P
LOC_Os04g46250.1 AP2 domain containing protein, expressed GO:0009628 response to abiotic stimulus P
LOC_Os04g46250.1 AP2 domain containing protein, expressed GO:0008150 biological_process P
LOC_Os04g46250.1 AP2 domain containing protein, expressed GO:0003700 sequence-specific DNA binding transcription factor activity F
LOC_Os04g46270.1 expressed protein GO:0005623 cell C
LOC_Os04g46270.1 expressed protein GO:0008152 metabolic process P
LOC_Os04g46270.1 expressed protein GO:0016787 hydrolase activity F
LOC_Os04g46270.1 expressed protein GO:0006629 lipid metabolic process P
LOC_Os04g46280.1 hydrolase, NUDIX family, domain containing protein, expressed GO:0006950 response to stress P
LOC_Os04g46280.1 hydrolase, NUDIX family, domain containing protein, expressed GO:0008152 metabolic process P
LOC_Os04g46280.1 hydrolase, NUDIX family, domain containing protein, expressed GO:0016787 hydrolase activity F
LOC_Os04g46280.1 hydrolase, NUDIX family, domain containing protein, expressed GO:0005829 cytosol C
LOC_Os04g46290.1 ethylene-responsive element-binding protein, putative, expressed GO:0003674 molecular_function F
LOC_Os04g46290.1 ethylene-responsive element-binding protein, putative, expressed GO:0008150 biological_process P
LOC_Os04g46300.1 disease resistance protein RPM1, putative, expressed GO:0006950 response to stress P
LOC_Os04g46300.1 disease resistance protein RPM1, putative, expressed GO:0008219 cell death P
LOC_Os04g46300.1 disease resistance protein RPM1, putative, expressed GO:0005515 protein binding F
LOC_Os04g46300.1 disease resistance protein RPM1, putative, expressed GO:0000166 nucleotide binding F
LOC_Os04g46300.1 disease resistance protein RPM1, putative, expressed GO:0005886 plasma membrane C
LOC_Os04g46310.1 HEAT repeat family protein, putative, expressed GO:0005515 protein binding F
LOC_Os04g46310.1 HEAT repeat family protein, putative, expressed GO:0005773 vacuole C
LOC_Os04g46310.1 HEAT repeat family protein, putative, expressed GO:0009536 plastid C
LOC_Os04g46320.1 inactive receptor kinase At2g26730 precursor, putative, expressed GO:0005623 cell C
LOC_Os04g46320.1 inactive receptor kinase At2g26730 precursor, putative, expressed GO:0008152 metabolic process P
LOC_Os04g46320.1 inactive receptor kinase At2g26730 precursor, putative, expressed GO:0009987 cellular process P
LOC_Os04g46320.1 inactive receptor kinase At2g26730 precursor, putative, expressed GO:0000166 nucleotide binding F
LOC_Os04g46320.1 inactive receptor kinase At2g26730 precursor, putative, expressed GO:0016301 kinase activity F
LOC_Os04g46320.1 inactive receptor kinase At2g26730 precursor, putative, expressed GO:0006464 protein modification process P
LOC_Os04g46330.1 expressed protein GO:0003674 molecular_function F
LOC_Os04g46330.1 expressed protein GO:0005575 cellular_component C
LOC_Os04g46330.1 expressed protein GO:0008150 biological_process P
LOC_Os04g46350.1 homeobox associated leucine zipper, putative, expressed GO:0007165 signal transduction P
LOC_Os04g46350.1 homeobox associated leucine zipper, putative, expressed GO:0009628 response to abiotic stimulus P
LOC_Os04g46350.1 homeobox associated leucine zipper, putative, expressed GO:0009719 response to endogenous stimulus P
LOC_Os04g46350.1 homeobox associated leucine zipper, putative, expressed GO:0003677 DNA binding F
LOC_Os04g46350.1 homeobox associated leucine zipper, putative, expressed GO:0009058 biosynthetic process P
LOC_Os04g46350.1 homeobox associated leucine zipper, putative, expressed GO:0006139 nucleobase, nucleoside, nucleotide and nucleic acid metabolic process P
LOC_Os04g46350.1 homeobox associated leucine zipper, putative, expressed GO:0008150 biological_process P
LOC_Os04g46350.1 homeobox associated leucine zipper, putative, expressed GO:0003700 sequence-specific DNA binding transcription factor activity F
LOC_Os04g46350.1 homeobox associated leucine zipper, putative, expressed GO:0005634 nucleus C
LOC_Os04g46350.1 homeobox associated leucine zipper, putative, expressed GO:0016043 cellular component organization P
LOC_Os04g46350.1 homeobox associated leucine zipper, putative, expressed GO:0009653 anatomical structure morphogenesis P
LOC_Os04g46350.1 homeobox associated leucine zipper, putative, expressed GO:0016049 cell growth P
LOC_Os04g46350.1 homeobox associated leucine zipper, putative, expressed GO:0007275 multicellular organismal development P
LOC_Os04g46350.1 homeobox associated leucine zipper, putative, expressed GO:0005515 protein binding F
LOC_Os04g46370.1 L-asparaginase precursor protein, putative, expressed GO:0005623 cell C
LOC_Os04g46370.1 L-asparaginase precursor protein, putative, expressed GO:0008152 metabolic process P
LOC_Os04g46370.1 L-asparaginase precursor protein, putative, expressed GO:0016787 hydrolase activity F
LOC_Os04g46370.1 L-asparaginase precursor protein, putative, expressed GO:0009987 cellular process P
LOC_Os04g46370.1 L-asparaginase precursor protein, putative, expressed GO:0009056 catabolic process P
LOC_Os04g46370.1 L-asparaginase precursor protein, putative, expressed GO:0019538 protein metabolic process P
LOC_Os04g46384.1 MYB family transcription factor, putative, expressed GO:0003677 DNA binding F
LOC_Os04g46384.1 MYB family transcription factor, putative, expressed GO:0005634 nucleus C
LOC_Os04g46384.1 MYB family transcription factor, putative, expressed GO:0009058 biosynthetic process P
LOC_Os04g46384.1 MYB family transcription factor, putative, expressed GO:0006139 nucleobase, nucleoside, nucleotide and nucleic acid metabolic process P
LOC_Os04g46384.1 MYB family transcription factor, putative, expressed GO:0000003 reproduction P
LOC_Os04g46384.1 MYB family transcription factor, putative, expressed GO:0030154 cell differentiation P
LOC_Os04g46384.1 MYB family transcription factor, putative, expressed GO:0007275 multicellular organismal development P
LOC_Os04g46384.1 MYB family transcription factor, putative, expressed GO:0003700 sequence-specific DNA binding transcription factor activity F
LOC_Os04g46390.2 chaperone protein dnaJ, putative, expressed GO:0019538 protein metabolic process P
LOC_Os04g46390.2 chaperone protein dnaJ, putative, expressed GO:0009987 cellular process P
LOC_Os04g46390.2 chaperone protein dnaJ, putative, expressed GO:0000166 nucleotide binding F
LOC_Os04g46390.2 chaperone protein dnaJ, putative, expressed GO:0005575 cellular_component C
LOC_Os04g46390.2 chaperone protein dnaJ, putative, expressed GO:0005515 protein binding F
LOC_Os04g46390.2 chaperone protein dnaJ, putative, expressed GO:0006139 nucleobase, nucleoside, nucleotide and nucleic acid metabolic process P
LOC_Os04g46390.2 chaperone protein dnaJ, putative, expressed GO:0009056 catabolic process P
LOC_Os04g46390.2 chaperone protein dnaJ, putative, expressed GO:0009908 flower development P
LOC_Os04g46390.2 chaperone protein dnaJ, putative, expressed GO:0005618 cell wall C
LOC_Os04g46390.2 chaperone protein dnaJ, putative, expressed GO:0005730 nucleolus C
LOC_Os04g46390.2 chaperone protein dnaJ, putative, expressed GO:0005829 cytosol C
LOC_Os04g46390.2 chaperone protein dnaJ, putative, expressed GO:0006950 response to stress P
LOC_Os04g46390.2 chaperone protein dnaJ, putative, expressed GO:0009628 response to abiotic stimulus P
LOC_Os04g46390.2 chaperone protein dnaJ, putative, expressed GO:0005886 plasma membrane C
LOC_Os04g46400.1 AP2 domain containing protein, expressed GO:0003677 DNA binding F
LOC_Os04g46400.1 AP2 domain containing protein, expressed GO:0005634 nucleus C
LOC_Os04g46400.1 AP2 domain containing protein, expressed GO:0009058 biosynthetic process P
LOC_Os04g46400.1 AP2 domain containing protein, expressed GO:0006139 nucleobase, nucleoside, nucleotide and nucleic acid metabolic process P
LOC_Os04g46400.1 AP2 domain containing protein, expressed GO:0003700 sequence-specific DNA binding transcription factor activity F
LOC_Os04g46400.1 AP2 domain containing protein, expressed GO:0009536 plastid C
LOC_Os04g46410.1 AP2 domain containing protein, expressed GO:0003677 DNA binding F
LOC_Os04g46410.1 AP2 domain containing protein, expressed GO:0005634 nucleus C
LOC_Os04g46410.1 AP2 domain containing protein, expressed GO:0009058 biosynthetic process P
LOC_Os04g46410.1 AP2 domain containing protein, expressed GO:0006139 nucleobase, nucleoside, nucleotide and nucleic acid metabolic process P
LOC_Os04g46410.1 AP2 domain containing protein, expressed GO:0009987 cellular process P
LOC_Os04g46410.1 AP2 domain containing protein, expressed GO:0003700 sequence-specific DNA binding transcription factor activity F
LOC_Os04g46440.1 AP2 domain containing protein, expressed GO:0003677 DNA binding F
LOC_Os04g46440.1 AP2 domain containing protein, expressed GO:0005634 nucleus C
LOC_Os04g46440.1 AP2 domain containing protein, expressed GO:0009058 biosynthetic process P
LOC_Os04g46440.1 AP2 domain containing protein, expressed GO:0006139 nucleobase, nucleoside, nucleotide and nucleic acid metabolic process P
LOC_Os04g46440.1 AP2 domain containing protein, expressed GO:0003700 sequence-specific DNA binding transcription factor activity F
LOC_Os04g46440.1 AP2 domain containing protein, expressed GO:0009536 plastid C
LOC_Os04g46450.1 zinc finger, C3HC4 type domain containing protein, expressed GO:0016043 cellular component organization P
LOC_Os04g46450.1 zinc finger, C3HC4 type domain containing protein, expressed GO:0006464 protein modification process P
LOC_Os04g46450.1 zinc finger, C3HC4 type domain containing protein, expressed GO:0006950 response to stress P
LOC_Os04g46450.1 zinc finger, C3HC4 type domain containing protein, expressed GO:0009607 response to biotic stimulus P
LOC_Os04g46450.1 zinc finger, C3HC4 type domain containing protein, expressed GO:0005634 nucleus C
LOC_Os04g46450.1 zinc finger, C3HC4 type domain containing protein, expressed GO:0005515 protein binding F
LOC_Os04g46450.1 zinc finger, C3HC4 type domain containing protein, expressed GO:0009653 anatomical structure morphogenesis P
LOC_Os04g46450.1 zinc finger, C3HC4 type domain containing protein, expressed GO:0007275 multicellular organismal development P
LOC_Os04g46450.1 zinc finger, C3HC4 type domain containing protein, expressed GO:0016049 cell growth P
LOC_Os04g46450.1 zinc finger, C3HC4 type domain containing protein, expressed GO:0000003 reproduction P
LOC_Os04g46450.1 zinc finger, C3HC4 type domain containing protein, expressed GO:0009791 post-embryonic development P
LOC_Os04g46450.1 zinc finger, C3HC4 type domain containing protein, expressed GO:0003824 catalytic activity F
LOC_Os04g46450.1 zinc finger, C3HC4 type domain containing protein, expressed GO:0007049 cell cycle P
LOC_Os04g46450.1 zinc finger, C3HC4 type domain containing protein, expressed GO:0009987 cellular process P
LOC_Os04g46450.1 zinc finger, C3HC4 type domain containing protein, expressed GO:0005488 binding F
LOC_Os04g46450.1 zinc finger, C3HC4 type domain containing protein, expressed GO:0005739 mitochondrion C
LOC_Os04g46460.2 amino acid kinase, putative, expressed GO:0005488 binding F
LOC_Os04g46460.2 amino acid kinase, putative, expressed GO:0008152 metabolic process P
LOC_Os04g46460.2 amino acid kinase, putative, expressed GO:0009987 cellular process P
LOC_Os04g46460.2 amino acid kinase, putative, expressed GO:0005515 protein binding F
LOC_Os04g46460.2 amino acid kinase, putative, expressed GO:0009058 biosynthetic process P
LOC_Os04g46460.2 amino acid kinase, putative, expressed GO:0016301 kinase activity F
LOC_Os04g46460.2 amino acid kinase, putative, expressed GO:0009536 plastid C
LOC_Os04g46470.1 carotenoid cleavage dioxygenase 7, chloroplast precursor, putative, expressed GO:0009653 anatomical structure morphogenesis P
LOC_Os04g46470.1 carotenoid cleavage dioxygenase 7, chloroplast precursor, putative, expressed GO:0007275 multicellular organismal development P
LOC_Os04g46470.1 carotenoid cleavage dioxygenase 7, chloroplast precursor, putative, expressed GO:0003824 catalytic activity F
LOC_Os04g46470.1 carotenoid cleavage dioxygenase 7, chloroplast precursor, putative, expressed GO:0008152 metabolic process P
LOC_Os04g46470.1 carotenoid cleavage dioxygenase 7, chloroplast precursor, putative, expressed GO:0009056 catabolic process P
LOC_Os04g46470.1 carotenoid cleavage dioxygenase 7, chloroplast precursor, putative, expressed GO:0009987 cellular process P
LOC_Os04g46470.1 carotenoid cleavage dioxygenase 7, chloroplast precursor, putative, expressed GO:0006629 lipid metabolic process P
LOC_Os04g46470.1 carotenoid cleavage dioxygenase 7, chloroplast precursor, putative, expressed GO:0006810 transport P
LOC_Os04g46470.1 carotenoid cleavage dioxygenase 7, chloroplast precursor, putative, expressed GO:0009536 plastid C
LOC_Os04g46480.1 expressed protein GO:0003674 molecular_function F
LOC_Os04g46480.1 expressed protein GO:0008150 biological_process P
LOC_Os04g46490.1 aquaporin protein, putative, expressed GO:0006810 transport P
LOC_Os04g46490.1 aquaporin protein, putative, expressed GO:0016020 membrane C
LOC_Os04g46490.1 aquaporin protein, putative, expressed GO:0009987 cellular process P
LOC_Os04g46490.1 aquaporin protein, putative, expressed GO:0000003 reproduction P
LOC_Os04g46490.1 aquaporin protein, putative, expressed GO:0030154 cell differentiation P
LOC_Os04g46490.1 aquaporin protein, putative, expressed GO:0007275 multicellular organismal development P
LOC_Os04g46490.1 aquaporin protein, putative, expressed GO:0005215 transporter activity F
LOC_Os04g46490.1 aquaporin protein, putative, expressed GO:0005623 cell C
LOC_Os04g46490.1 aquaporin protein, putative, expressed GO:0005739 mitochondrion C
LOC_Os04g46560.1 lactate/malate dehydrogenase, putative, expressed GO:0003824 catalytic activity F
LOC_Os04g46560.1 lactate/malate dehydrogenase, putative, expressed GO:0008152 metabolic process P
LOC_Os04g46560.1 lactate/malate dehydrogenase, putative, expressed GO:0005575 cellular_component C
LOC_Os04g46560.1 lactate/malate dehydrogenase, putative, expressed GO:0005975 carbohydrate metabolic process P
LOC_Os04g46560.1 lactate/malate dehydrogenase, putative, expressed GO:0006091 generation of precursor metabolites and energy P
LOC_Os04g46560.1 lactate/malate dehydrogenase, putative, expressed GO:0009056 catabolic process P
LOC_Os04g46560.1 lactate/malate dehydrogenase, putative, expressed GO:0009987 cellular process P
LOC_Os04g46560.1 lactate/malate dehydrogenase, putative, expressed GO:0005488 binding F
LOC_Os04g46560.1 lactate/malate dehydrogenase, putative, expressed GO:0005829 cytosol C
LOC_Os04g46560.1 lactate/malate dehydrogenase, putative, expressed GO:0005886 plasma membrane C
LOC_Os04g46570.1 growth regulator related protein, putative, expressed GO:0003674 molecular_function F
LOC_Os04g46570.1 growth regulator related protein, putative, expressed GO:0005794 Golgi apparatus C
LOC_Os04g46570.1 growth regulator related protein, putative, expressed GO:0008150 biological_process P
LOC_Os04g46580.1 OsSPL7 - SBP-box gene family member, expressed GO:0003677 DNA binding F
LOC_Os04g46580.1 OsSPL7 - SBP-box gene family member, expressed GO:0005634 nucleus C
LOC_Os04g46580.1 OsSPL7 - SBP-box gene family member, expressed GO:0007275 multicellular organismal development P
LOC_Os04g46580.1 OsSPL7 - SBP-box gene family member, expressed GO:0009058 biosynthetic process P
LOC_Os04g46580.1 OsSPL7 - SBP-box gene family member, expressed GO:0006139 nucleobase, nucleoside, nucleotide and nucleic acid metabolic process P
LOC_Os04g46580.1 OsSPL7 - SBP-box gene family member, expressed GO:0003700 sequence-specific DNA binding transcription factor activity F
LOC_Os04g46600.1 zinc finger protein, putative, expressed GO:0005575 cellular_component C
LOC_Os04g46610.2 PAP fibrillin family domain containing protein, expressed GO:0005198 structural molecule activity F
LOC_Os04g46610.2 PAP fibrillin family domain containing protein, expressed GO:0008150 biological_process P
LOC_Os04g46610.2 PAP fibrillin family domain containing protein, expressed GO:0009536 plastid C
LOC_Os04g46620.1 T-complex protein, putative, expressed GO:0019538 protein metabolic process P
LOC_Os04g46620.1 T-complex protein, putative, expressed GO:0009987 cellular process P
LOC_Os04g46620.1 T-complex protein, putative, expressed GO:0000166 nucleotide binding F
LOC_Os04g46620.1 T-complex protein, putative, expressed GO:0005515 protein binding F
LOC_Os04g46620.1 T-complex protein, putative, expressed GO:0005829 cytosol C
LOC_Os04g46630.1 expansin precursor, putative, expressed GO:0005623 cell C
LOC_Os04g46630.1 expansin precursor, putative, expressed GO:0016043 cellular component organization P
LOC_Os04g46630.1 expansin precursor, putative, expressed GO:0009653 anatomical structure morphogenesis P
LOC_Os04g46630.1 expansin precursor, putative, expressed GO:0016049 cell growth P
LOC_Os04g46630.1 expansin precursor, putative, expressed GO:0009987 cellular process P
LOC_Os04g46630.1 expansin precursor, putative, expressed GO:0005576 extracellular region C
LOC_Os04g46650.1 expansin precursor, putative, expressed GO:0005623 cell C
LOC_Os04g46650.1 expansin precursor, putative, expressed GO:0016043 cellular component organization P
LOC_Os04g46650.1 expansin precursor, putative, expressed GO:0009653 anatomical structure morphogenesis P
LOC_Os04g46650.1 expansin precursor, putative, expressed GO:0016049 cell growth P
LOC_Os04g46650.1 expansin precursor, putative, expressed GO:0009987 cellular process P
LOC_Os04g46650.1 expansin precursor, putative, expressed GO:0005576 extracellular region C
LOC_Os04g46660.1 cyclin, putative, expressed GO:0005575 cellular_component C
LOC_Os04g46660.1 cyclin, putative, expressed GO:0005515 protein binding F
LOC_Os04g46660.1 cyclin, putative, expressed GO:0016301 kinase activity F
LOC_Os04g46660.1 cyclin, putative, expressed GO:0006464 protein modification process P
LOC_Os04g46660.1 cyclin, putative, expressed GO:0007049 cell cycle P
LOC_Os04g46670.1 ZOS4-09 - C2H2 zinc finger protein, expressed GO:0009058 biosynthetic process P
LOC_Os04g46670.1 ZOS4-09 - C2H2 zinc finger protein, expressed GO:0006139 nucleobase, nucleoside, nucleotide and nucleic acid metabolic process P
LOC_Os04g46670.1 ZOS4-09 - C2H2 zinc finger protein, expressed GO:0005488 binding F
LOC_Os04g46670.1 ZOS4-09 - C2H2 zinc finger protein, expressed GO:0005622 intracellular C
LOC_Os04g46670.1 ZOS4-09 - C2H2 zinc finger protein, expressed GO:0003700 sequence-specific DNA binding transcription factor activity F
LOC_Os04g46670.1 ZOS4-09 - C2H2 zinc finger protein, expressed GO:0003676 nucleic acid binding F
LOC_Os04g46680.1 ZOS4-10 - C2H2 zinc finger protein, expressed GO:0009058 biosynthetic process P
LOC_Os04g46680.1 ZOS4-10 - C2H2 zinc finger protein, expressed GO:0006139 nucleobase, nucleoside, nucleotide and nucleic acid metabolic process P
LOC_Os04g46680.1 ZOS4-10 - C2H2 zinc finger protein, expressed GO:0005488 binding F
LOC_Os04g46680.1 ZOS4-10 - C2H2 zinc finger protein, expressed GO:0005622 intracellular C
LOC_Os04g46680.1 ZOS4-10 - C2H2 zinc finger protein, expressed GO:0003700 sequence-specific DNA binding transcription factor activity F
LOC_Os04g46680.1 ZOS4-10 - C2H2 zinc finger protein, expressed GO:0003676 nucleic acid binding F
LOC_Os05g16420.1 SHR5-receptor-like kinase, putative, expressed GO:0016020 membrane C
LOC_Os05g16420.1 SHR5-receptor-like kinase, putative, expressed GO:0016301 kinase activity F
LOC_Os05g16420.1 SHR5-receptor-like kinase, putative, expressed GO:0000166 nucleotide binding F
LOC_Os05g16420.1 SHR5-receptor-like kinase, putative, expressed GO:0006464 protein modification process P
LOC_Os05g16420.1 SHR5-receptor-like kinase, putative, expressed GO:0005886 plasma membrane C
LOC_Os05g16430.1 SHR5-receptor-like kinase, putative, expressed GO:0016301 kinase activity F
LOC_Os05g16430.1 SHR5-receptor-like kinase, putative, expressed GO:0000166 nucleotide binding F
LOC_Os05g16430.1 SHR5-receptor-like kinase, putative, expressed GO:0006464 protein modification process P
LOC_Os05g16430.1 SHR5-receptor-like kinase, putative, expressed GO:0005886 plasma membrane C
LOC_Os05g16630.1 thioredoxin domain-containing protein 9, putative, expressed GO:0016043 cellular component organization P
LOC_Os05g16630.1 thioredoxin domain-containing protein 9, putative, expressed GO:0009987 cellular process P
LOC_Os05g16630.1 thioredoxin domain-containing protein 9, putative, expressed GO:0005634 nucleus C
LOC_Os05g16630.1 thioredoxin domain-containing protein 9, putative, expressed GO:0005737 cytoplasm C
LOC_Os05g16630.1 thioredoxin domain-containing protein 9, putative, expressed GO:0016049 cell growth P
LOC_Os05g16630.1 thioredoxin domain-containing protein 9, putative, expressed GO:0005515 protein binding F
LOC_Os05g16640.1 DUF630/DUF632 domains containing protein, putative, expressed GO:0003674 molecular_function F
LOC_Os05g16640.1 DUF630/DUF632 domains containing protein, putative, expressed GO:0005575 cellular_component C
LOC_Os05g16640.1 DUF630/DUF632 domains containing protein, putative, expressed GO:0008150 biological_process P
LOC_Os05g16660.2 WD domain, G-beta repeat domain containing protein, expressed GO:0005622 intracellular C
LOC_Os05g16660.2 WD domain, G-beta repeat domain containing protein, expressed GO:0008150 biological_process P
LOC_Os05g16660.2 WD domain, G-beta repeat domain containing protein, expressed GO:0005515 protein binding F
LOC_Os05g16660.2 WD domain, G-beta repeat domain containing protein, expressed GO:0000166 nucleotide binding F
LOC_Os05g16660.2 WD domain, G-beta repeat domain containing protein, expressed GO:0005829 cytosol C
LOC_Os05g16660.2 WD domain, G-beta repeat domain containing protein, expressed GO:0006950 response to stress P
LOC_Os05g16660.2 WD domain, G-beta repeat domain containing protein, expressed GO:0009628 response to abiotic stimulus P
LOC_Os05g16670.2 SHR5-receptor-like kinase, putative, expressed GO:0008152 metabolic process P
LOC_Os05g16670.2 SHR5-receptor-like kinase, putative, expressed GO:0009987 cellular process P
LOC_Os05g16670.2 SHR5-receptor-like kinase, putative, expressed GO:0016301 kinase activity F
LOC_Os05g16670.2 SHR5-receptor-like kinase, putative, expressed GO:0006464 protein modification process P
LOC_Os05g16740.1 SHR5-receptor-like kinase, putative, expressed GO:0016020 membrane C
LOC_Os05g16740.1 SHR5-receptor-like kinase, putative, expressed GO:0016301 kinase activity F
LOC_Os05g16740.1 SHR5-receptor-like kinase, putative, expressed GO:0000166 nucleotide binding F
LOC_Os05g16740.1 SHR5-receptor-like kinase, putative, expressed GO:0006464 protein modification process P
LOC_Os05g16740.1 SHR5-receptor-like kinase, putative, expressed GO:0005886 plasma membrane C
LOC_Os05g20570.1 invertase/pectin methylesterase inhibitor family protein, putative, expressed GO:0005623 cell C
LOC_Os05g20570.1 invertase/pectin methylesterase inhibitor family protein, putative, expressed GO:0008152 metabolic process P
LOC_Os05g20570.1 invertase/pectin methylesterase inhibitor family protein, putative, expressed GO:0030234 enzyme regulator activity F
LOC_Os05g20570.1 invertase/pectin methylesterase inhibitor family protein, putative, expressed GO:0016787 hydrolase activity F
LOC_Os05g20570.1 invertase/pectin methylesterase inhibitor family protein, putative, expressed GO:0008150 biological_process P
LOC_Os06g01290.1 expressed protein GO:0016020 membrane C
LOC_Os06g01290.1 expressed protein GO:0009536 plastid C
LOC_Os06g01290.1 expressed protein GO:0009579 thylakoid C
LOC_Os06g01290.1 expressed protein GO:0005215 transporter activity F
LOC_Os06g01290.1 expressed protein GO:0006810 transport P
LOC_Os06g01290.1 expressed protein GO:0009987 cellular process P
LOC_Os06g01304.1 spotted leaf 11, putative, expressed GO:0005515 protein binding F
LOC_Os06g01304.1 spotted leaf 11, putative, expressed GO:0006464 protein modification process P
LOC_Os06g01304.1 spotted leaf 11, putative, expressed GO:0005102 receptor binding F
LOC_Os06g01304.1 spotted leaf 11, putative, expressed GO:0003824 catalytic activity F
LOC_Os06g01320.1 chromo domain containing protein, expressed GO:0040029 regulation of gene expression, epigenetic P
LOC_Os06g01320.1 chromo domain containing protein, expressed GO:0016043 cellular component organization P
LOC_Os06g01320.1 chromo domain containing protein, expressed GO:0006139 nucleobase, nucleoside, nucleotide and nucleic acid metabolic process P
LOC_Os06g01320.1 chromo domain containing protein, expressed GO:0009058 biosynthetic process P
LOC_Os06g01320.1 chromo domain containing protein, expressed GO:0005634 nucleus C
LOC_Os06g01340.1 CCT/B-box zinc finger protein, putative, expressed GO:0008150 biological_process P
LOC_Os06g01340.1 CCT/B-box zinc finger protein, putative, expressed GO:0005634 nucleus C
LOC_Os06g01340.1 CCT/B-box zinc finger protein, putative, expressed GO:0009058 biosynthetic process P
LOC_Os06g01340.1 CCT/B-box zinc finger protein, putative, expressed GO:0006139 nucleobase, nucleoside, nucleotide and nucleic acid metabolic process P
LOC_Os06g01340.1 CCT/B-box zinc finger protein, putative, expressed GO:0005488 binding F
LOC_Os06g01340.1 CCT/B-box zinc finger protein, putative, expressed GO:0000003 reproduction P
LOC_Os06g01340.1 CCT/B-box zinc finger protein, putative, expressed GO:0009628 response to abiotic stimulus P
LOC_Os06g01340.1 CCT/B-box zinc finger protein, putative, expressed GO:0009791 post-embryonic development P
LOC_Os06g01340.1 CCT/B-box zinc finger protein, putative, expressed GO:0003700 sequence-specific DNA binding transcription factor activity F
LOC_Os06g01350.1 transferase family protein, putative, expressed GO:0008152 metabolic process P
LOC_Os06g01350.1 transferase family protein, putative, expressed GO:0005829 cytosol C
LOC_Os06g01350.1 transferase family protein, putative, expressed GO:0016740 transferase activity F
LOC_Os06g01350.1 transferase family protein, putative, expressed GO:0008150 biological_process P
LOC_Os06g01360.1 homogentisate 1,2-dioxygenase, putative, expressed GO:0009056 catabolic process P
LOC_Os06g01360.1 homogentisate 1,2-dioxygenase, putative, expressed GO:0009987 cellular process P
LOC_Os06g01360.1 homogentisate 1,2-dioxygenase, putative, expressed GO:0005829 cytosol C
LOC_Os06g01360.1 homogentisate 1,2-dioxygenase, putative, expressed GO:0003824 catalytic activity F
LOC_Os06g01360.1 homogentisate 1,2-dioxygenase, putative, expressed GO:0008152 metabolic process P
LOC_Os06g01370.1 DNA-binding protein-related, putative, expressed GO:0008150 biological_process P
LOC_Os06g01390.1 acyl-coenzyme A oxidase 1.2, peroxisomal, putative, expressed GO:0006950 response to stress P
LOC_Os06g01390.1 acyl-coenzyme A oxidase 1.2, peroxisomal, putative, expressed GO:0007275 multicellular organismal development P
LOC_Os06g01390.1 acyl-coenzyme A oxidase 1.2, peroxisomal, putative, expressed GO:0009607 response to biotic stimulus P
LOC_Os06g01390.1 acyl-coenzyme A oxidase 1.2, peroxisomal, putative, expressed GO:0005575 cellular_component C
LOC_Os06g01390.1 acyl-coenzyme A oxidase 1.2, peroxisomal, putative, expressed GO:0005777 peroxisome C
LOC_Os06g01390.1 acyl-coenzyme A oxidase 1.2, peroxisomal, putative, expressed GO:0008152 metabolic process P
LOC_Os06g01390.1 acyl-coenzyme A oxidase 1.2, peroxisomal, putative, expressed GO:0009987 cellular process P
LOC_Os06g01390.1 acyl-coenzyme A oxidase 1.2, peroxisomal, putative, expressed GO:0006629 lipid metabolic process P
LOC_Os06g01390.1 acyl-coenzyme A oxidase 1.2, peroxisomal, putative, expressed GO:0008150 biological_process P
LOC_Os06g01390.1 acyl-coenzyme A oxidase 1.2, peroxisomal, putative, expressed GO:0009056 catabolic process P
LOC_Os06g01390.1 acyl-coenzyme A oxidase 1.2, peroxisomal, putative, expressed GO:0003824 catalytic activity F
LOC_Os06g01390.1 acyl-coenzyme A oxidase 1.2, peroxisomal, putative, expressed GO:0009058 biosynthetic process P
LOC_Os06g01400.1 glycyl-tRNA synthetase 2, chloroplast/mitochondrial precursor, putative, expressed GO:0003824 catalytic activity F
LOC_Os06g01400.1 glycyl-tRNA synthetase 2, chloroplast/mitochondrial precursor, putative, expressed GO:0006139 nucleobase, nucleoside, nucleotide and nucleic acid metabolic process P
LOC_Os06g01400.1 glycyl-tRNA synthetase 2, chloroplast/mitochondrial precursor, putative, expressed GO:0006412 translation P
LOC_Os06g01400.1 glycyl-tRNA synthetase 2, chloroplast/mitochondrial precursor, putative, expressed GO:0009790 embryo development P
LOC_Os06g01400.1 glycyl-tRNA synthetase 2, chloroplast/mitochondrial precursor, putative, expressed GO:0005739 mitochondrion C
LOC_Os06g01400.1 glycyl-tRNA synthetase 2, chloroplast/mitochondrial precursor, putative, expressed GO:0000003 reproduction P
LOC_Os06g01400.1 glycyl-tRNA synthetase 2, chloroplast/mitochondrial precursor, putative, expressed GO:0009791 post-embryonic development P
LOC_Os06g01400.1 glycyl-tRNA synthetase 2, chloroplast/mitochondrial precursor, putative, expressed GO:0009536 plastid C
LOC_Os06g01410.1 glutamine cyclotransferase precursor, putative, expressed GO:0006464 protein modification process P
LOC_Os06g01410.1 glutamine cyclotransferase precursor, putative, expressed GO:0008152 metabolic process P
LOC_Os06g01410.1 glutamine cyclotransferase precursor, putative, expressed GO:0003824 catalytic activity F
LOC_Os06g01410.1 glutamine cyclotransferase precursor, putative, expressed GO:0016740 transferase activity F
LOC_Os06g01440.1 integral membrane protein, putative, expressed GO:0003674 molecular_function F
LOC_Os06g01440.1 integral membrane protein, putative, expressed GO:0016020 membrane C
LOC_Os06g01440.1 integral membrane protein, putative, expressed GO:0008150 biological_process P
LOC_Os06g01460.1 expressed protein GO:0003674 molecular_function F
LOC_Os06g01460.1 expressed protein GO:0008150 biological_process P
LOC_Os06g01470.1 AGAP000326-PA, putative, expressed GO:0009058 biosynthetic process P
LOC_Os06g01470.1 AGAP000326-PA, putative, expressed GO:0016740 transferase activity F
LOC_Os06g01480.1 NAC domain containing protein, putative, expressed GO:0005575 cellular_component C
LOC_Os06g01480.1 NAC domain containing protein, putative, expressed GO:0009058 biosynthetic process P
LOC_Os06g01480.1 NAC domain containing protein, putative, expressed GO:0006139 nucleobase, nucleoside, nucleotide and nucleic acid metabolic process P
LOC_Os06g01480.1 NAC domain containing protein, putative, expressed GO:0003700 sequence-specific DNA binding transcription factor activity F
LOC_Os06g01490.1 monocopper oxidase, putative, expressed GO:0016020 membrane C
LOC_Os06g01490.1 monocopper oxidase, putative, expressed GO:0005576 extracellular region C
LOC_Os06g01490.1 monocopper oxidase, putative, expressed GO:0005575 cellular_component C
LOC_Os06g01490.1 monocopper oxidase, putative, expressed GO:0008152 metabolic process P
LOC_Os06g01490.1 monocopper oxidase, putative, expressed GO:0005773 vacuole C
LOC_Os06g01490.1 monocopper oxidase, putative, expressed GO:0016043 cellular component organization P
LOC_Os06g01490.1 monocopper oxidase, putative, expressed GO:0009653 anatomical structure morphogenesis P
LOC_Os06g01490.1 monocopper oxidase, putative, expressed GO:0016049 cell growth P
LOC_Os06g01490.1 monocopper oxidase, putative, expressed GO:0005618 cell wall C
LOC_Os06g01490.1 monocopper oxidase, putative, expressed GO:0005488 binding F
LOC_Os06g01490.1 monocopper oxidase, putative, expressed GO:0005886 plasma membrane C
LOC_Os06g01490.1 monocopper oxidase, putative, expressed GO:0003824 catalytic activity F
LOC_Os10g37400.1 DUF538 domain containing protein, putative, expressed GO:0005634 nucleus C
LOC_Os10g37400.1 DUF538 domain containing protein, putative, expressed GO:0008150 biological_process P
LOC_Os10g37410.1 TBC domain containing protein, expressed GO:0030234 enzyme regulator activity F
LOC_Os10g37410.1 TBC domain containing protein, expressed GO:0007165 signal transduction P
LOC_Os10g37410.1 TBC domain containing protein, expressed GO:0006139 nucleobase, nucleoside, nucleotide and nucleic acid metabolic process P
LOC_Os10g37410.1 TBC domain containing protein, expressed GO:0009056 catabolic process P
LOC_Os10g37420.1 cytochrome b5-like Heme/Steroid binding domain containing protein, expressed GO:0016020 membrane C
LOC_Os10g37420.1 cytochrome b5-like Heme/Steroid binding domain containing protein, expressed GO:0005773 vacuole C
LOC_Os10g37420.1 cytochrome b5-like Heme/Steroid binding domain containing protein, expressed GO:0005488 binding F
LOC_Os10g37420.1 cytochrome b5-like Heme/Steroid binding domain containing protein, expressed GO:0009536 plastid C
LOC_Os10g37420.1 cytochrome b5-like Heme/Steroid binding domain containing protein, expressed GO:0009579 thylakoid C
LOC_Os10g37420.1 cytochrome b5-like Heme/Steroid binding domain containing protein, expressed GO:0005783 endoplasmic reticulum C
LOC_Os10g37420.1 cytochrome b5-like Heme/Steroid binding domain containing protein, expressed GO:0005886 plasma membrane C
LOC_Os10g37430.1 expressed protein GO:0006810 transport P
LOC_Os10g37430.1 expressed protein GO:0016043 cellular component organization P
LOC_Os10g37430.1 expressed protein GO:0009987 cellular process P
LOC_Os10g37430.1 expressed protein GO:0005829 cytosol C
LOC_Os10g37430.1 expressed protein GO:0005488 binding F
LOC_Os10g37480.1 STE_PAK_Ste20_STLK.6 - STE kinases include homologs to sterile 7, sterile 11 and sterile 20 from yeast, expressed GO:0008152 metabolic process P
LOC_Os10g37480.1 STE_PAK_Ste20_STLK.6 - STE kinases include homologs to sterile 7, sterile 11 and sterile 20 from yeast, expressed GO:0009987 cellular process P
LOC_Os10g37480.1 STE_PAK_Ste20_STLK.6 - STE kinases include homologs to sterile 7, sterile 11 and sterile 20 from yeast, expressed GO:0016301 kinase activity F
LOC_Os10g37480.1 STE_PAK_Ste20_STLK.6 - STE kinases include homologs to sterile 7, sterile 11 and sterile 20 from yeast, expressed GO:0000166 nucleotide binding F
LOC_Os10g37480.1 STE_PAK_Ste20_STLK.6 - STE kinases include homologs to sterile 7, sterile 11 and sterile 20 from yeast, expressed GO:0006464 protein modification process P
LOC_Os10g37480.1 STE_PAK_Ste20_STLK.6 - STE kinases include homologs to sterile 7, sterile 11 and sterile 20 from yeast, expressed GO:0005886 plasma membrane C
LOC_Os10g37490.1 DNA excision repair protein ERCC-1, putative, expressed GO:0016043 cellular component organization P
LOC_Os10g37490.1 DNA excision repair protein ERCC-1, putative, expressed GO:0006950 response to stress P
LOC_Os10g37490.1 DNA excision repair protein ERCC-1, putative, expressed GO:0006259 DNA metabolic process P
LOC_Os10g37490.1 DNA excision repair protein ERCC-1, putative, expressed GO:0005634 nucleus C
LOC_Os10g37490.1 DNA excision repair protein ERCC-1, putative, expressed GO:0004518 nuclease activity F
LOC_Os10g37490.1 DNA excision repair protein ERCC-1, putative, expressed GO:0009628 response to abiotic stimulus P
LOC_Os10g37500.1 AAA-type ATPase family protein, putative, expressed GO:0005623 cell C
LOC_Os10g37500.1 AAA-type ATPase family protein, putative, expressed GO:0008152 metabolic process P
LOC_Os10g37500.1 AAA-type ATPase family protein, putative, expressed GO:0000166 nucleotide binding F
LOC_Os10g37500.1 AAA-type ATPase family protein, putative, expressed GO:0016787 hydrolase activity F
LOC_Os10g37500.1 AAA-type ATPase family protein, putative, expressed GO:0009056 catabolic process P
LOC_Os10g37500.1 AAA-type ATPase family protein, putative, expressed GO:0006139 nucleobase, nucleoside, nucleotide and nucleic acid metabolic process P
LOC_Os10g37520.1 major facilitator superfamily domain-containing protein 5, putative, expressed GO:0016020 membrane C
LOC_Os10g37520.1 major facilitator superfamily domain-containing protein 5, putative, expressed GO:0005773 vacuole C
LOC_Os10g37530.1 mitochondrial import inner membrane translocase subunit Tim17, putative, expressed GO:0006810 transport P
LOC_Os10g37530.1 mitochondrial import inner membrane translocase subunit Tim17, putative, expressed GO:0009987 cellular process P
LOC_Os10g37530.1 mitochondrial import inner membrane translocase subunit Tim17, putative, expressed GO:0016020 membrane C
LOC_Os10g37530.1 mitochondrial import inner membrane translocase subunit Tim17, putative, expressed GO:0005739 mitochondrion C
LOC_Os10g37530.1 mitochondrial import inner membrane translocase subunit Tim17, putative, expressed GO:0005215 transporter activity F
LOC_Os10g37600.1 expressed protein GO:0003674 molecular_function F
LOC_Os10g37600.1 expressed protein GO:0005739 mitochondrion C
LOC_Os10g37600.1 expressed protein GO:0008150 biological_process P
LOC_Os10g37630.1 UBX domain-containing protein, putative, expressed GO:0008150 biological_process P
LOC_Os10g37640.1 HIT zinc finger domain containing protein, expressed GO:0003674 molecular_function F
LOC_Os10g37640.1 HIT zinc finger domain containing protein, expressed GO:0008150 biological_process P
LOC_Os10g37640.1 HIT zinc finger domain containing protein, expressed GO:0009536 plastid C
LOC_Os10g37650.1 impaired sucrose induction 1, putative, expressed GO:0007165 signal transduction P
LOC_Os10g37650.1 impaired sucrose induction 1, putative, expressed GO:0005975 carbohydrate metabolic process P
LOC_Os10g37650.1 impaired sucrose induction 1, putative, expressed GO:0005488 binding F
LOC_Os10g37660.1 trehalase precursor, putative, expressed GO:0008152 metabolic process P
LOC_Os10g37660.1 trehalase precursor, putative, expressed GO:0016787 hydrolase activity F
LOC_Os10g37660.1 trehalase precursor, putative, expressed GO:0005975 carbohydrate metabolic process P
LOC_Os10g37660.1 trehalase precursor, putative, expressed GO:0009987 cellular process P
LOC_Os10g37660.1 trehalase precursor, putative, expressed GO:0009056 catabolic process P
LOC_Os10g37660.1 trehalase precursor, putative, expressed GO:0005886 plasma membrane C
LOC_Os10g37670.1 actin-depolymerizing factor, putative, expressed GO:0005515 protein binding F
LOC_Os10g37670.1 actin-depolymerizing factor, putative, expressed GO:0005622 intracellular C
LOC_Os10g37670.1 actin-depolymerizing factor, putative, expressed GO:0008150 biological_process P
LOC_Os10g37690.1 inner membrane protein, putative, expressed GO:0003674 molecular_function F
LOC_Os10g37690.1 inner membrane protein, putative, expressed GO:0016020 membrane C
LOC_Os10g37690.1 inner membrane protein, putative, expressed GO:0005739 mitochondrion C
LOC_Os10g37690.1 inner membrane protein, putative, expressed GO:0006810 transport P
LOC_Os10g37690.1 inner membrane protein, putative, expressed GO:0016043 cellular component organization P
LOC_Os10g37690.1 inner membrane protein, putative, expressed GO:0009987 cellular process P
LOC_Os10g37700.1 hydrolase protein, putative, expressed GO:0005623 cell C
LOC_Os10g37700.1 hydrolase protein, putative, expressed GO:0008152 metabolic process P
LOC_Os10g37700.1 hydrolase protein, putative, expressed GO:0003824 catalytic activity F
LOC_Os10g37700.1 hydrolase protein, putative, expressed GO:0008150 biological_process P
LOC_Os10g37710.1 hydrolase, alpha/beta fold family protein, putative, expressed GO:0005783 endoplasmic reticulum C
LOC_Os10g37710.1 hydrolase, alpha/beta fold family protein, putative, expressed GO:0008152 metabolic process P
LOC_Os10g37710.1 hydrolase, alpha/beta fold family protein, putative, expressed GO:0016787 hydrolase activity F
LOC_Os10g37710.1 hydrolase, alpha/beta fold family protein, putative, expressed GO:0008150 biological_process P
LOC_Os10g37720.1 hydrolase, alpha/beta fold family protein, putative, expressed GO:0005623 cell C
LOC_Os10g37720.1 hydrolase, alpha/beta fold family protein, putative, expressed GO:0008152 metabolic process P
LOC_Os10g37720.1 hydrolase, alpha/beta fold family protein, putative, expressed GO:0003824 catalytic activity F
LOC_Os10g37720.1 hydrolase, alpha/beta fold family protein, putative, expressed GO:0008150 biological_process P
LOC_Os10g37730.1 pollen ankyrin, putative, expressed GO:0009058 biosynthetic process P
LOC_Os10g37730.1 pollen ankyrin, putative, expressed GO:0006464 protein modification process P
LOC_Os10g37730.1 pollen ankyrin, putative, expressed GO:0003824 catalytic activity F
LOC_Os10g37740.1 CGMC_GSK.9 - CGMC includes CDA, MAPK, GSK3, and CLKC kinases, expressed GO:0008152 metabolic process P
LOC_Os10g37740.1 CGMC_GSK.9 - CGMC includes CDA, MAPK, GSK3, and CLKC kinases, expressed GO:0009987 cellular process P
LOC_Os10g37740.1 CGMC_GSK.9 - CGMC includes CDA, MAPK, GSK3, and CLKC kinases, expressed GO:0005634 nucleus C
LOC_Os10g37740.1 CGMC_GSK.9 - CGMC includes CDA, MAPK, GSK3, and CLKC kinases, expressed GO:0009719 response to endogenous stimulus P
LOC_Os10g37740.1 CGMC_GSK.9 - CGMC includes CDA, MAPK, GSK3, and CLKC kinases, expressed GO:0016301 kinase activity F
LOC_Os10g37740.1 CGMC_GSK.9 - CGMC includes CDA, MAPK, GSK3, and CLKC kinases, expressed GO:0005829 cytosol C
LOC_Os10g37740.1 CGMC_GSK.9 - CGMC includes CDA, MAPK, GSK3, and CLKC kinases, expressed GO:0006464 protein modification process P
LOC_Os10g37760.1 OsRhmbd17 - Putative Rhomboid homologue, expressed GO:0016787 hydrolase activity F
LOC_Os10g37760.1 OsRhmbd17 - Putative Rhomboid homologue, expressed GO:0008152 metabolic process P
LOC_Os10g37760.1 OsRhmbd17 - Putative Rhomboid homologue, expressed GO:0005575 cellular_component C
LOC_Os10g37770.1 dehydration response related protein, putative, expressed GO:0005794 Golgi apparatus C
LOC_Os10g37770.1 dehydration response related protein, putative, expressed GO:0008150 biological_process P
LOC_Os10g37830.1 OsFBX391 - F-box domain containing protein, expressed GO:0006950 response to stress P
LOC_Os10g37830.1 OsFBX391 - F-box domain containing protein, expressed GO:0030246 carbohydrate binding F
LOC_Os10g37830.1 OsFBX391 - F-box domain containing protein, expressed GO:0005515 protein binding F
LOC_Os10g37830.1 OsFBX391 - F-box domain containing protein, expressed GO:0009058 biosynthetic process P
LOC_Os10g37830.1 OsFBX391 - F-box domain containing protein, expressed GO:0006464 protein modification process P
LOC_Os10g37840.2 CCB2, putative, expressed GO:0003674 molecular_function F
LOC_Os10g37840.2 CCB2, putative, expressed GO:0016043 cellular component organization P
LOC_Os10g37840.2 CCB2, putative, expressed GO:0009987 cellular process P
LOC_Os10g37840.2 CCB2, putative, expressed GO:0009536 plastid C
LOC_Os10g37850.1 armadillo, putative, expressed GO:0008150 biological_process P
LOC_Os10g37850.1 armadillo, putative, expressed GO:0005488 binding F
LOC_Os10g37880.1 oxidoreductase, putative, expressed GO:0009058 biosynthetic process P
LOC_Os10g37880.1 oxidoreductase, putative, expressed GO:0009987 cellular process P
LOC_Os10g37880.1 oxidoreductase, putative, expressed GO:0019748 secondary metabolic process P
LOC_Os10g37880.1 oxidoreductase, putative, expressed GO:0003824 catalytic activity F
LOC_Os10g37880.1 oxidoreductase, putative, expressed GO:0005488 binding F
LOC_Os10g37880.1 oxidoreductase, putative, expressed GO:0005777 peroxisome C
LOC_Os10g37880.1 oxidoreductase, putative, expressed GO:0008152 metabolic process P
LOC_Os10g37920.1 MATE efflux family protein, putative, expressed GO:0006810 transport P
LOC_Os10g37920.1 MATE efflux family protein, putative, expressed GO:0016020 membrane C
LOC_Os10g37920.1 MATE efflux family protein, putative, expressed GO:0009987 cellular process P
LOC_Os10g37920.1 MATE efflux family protein, putative, expressed GO:0005215 transporter activity F
LOC_Os10g37980.1 prephenate dehydratase domain containing protein, expressed GO:0003824 catalytic activity F
LOC_Os10g37980.1 prephenate dehydratase domain containing protein, expressed GO:0009058 biosynthetic process P
LOC_Os10g37980.1 prephenate dehydratase domain containing protein, expressed GO:0009987 cellular process P
LOC_Os10g37980.1 prephenate dehydratase domain containing protein, expressed GO:0008152 metabolic process P
LOC_Os10g37980.1 prephenate dehydratase domain containing protein, expressed GO:0009628 response to abiotic stimulus P
LOC_Os10g37980.1 prephenate dehydratase domain containing protein, expressed GO:0005829 cytosol C
LOC_Os10g37980.1 prephenate dehydratase domain containing protein, expressed GO:0009536 plastid C
LOC_Os10g38000.1 dehydration-responsive element-binding protein, putative, expressed GO:0006950 response to stress P
LOC_Os10g38000.1 dehydration-responsive element-binding protein, putative, expressed GO:0009607 response to biotic stimulus P
LOC_Os10g38000.1 dehydration-responsive element-binding protein, putative, expressed GO:0003677 DNA binding F
LOC_Os10g38000.1 dehydration-responsive element-binding protein, putative, expressed GO:0005634 nucleus C
LOC_Os10g38000.1 dehydration-responsive element-binding protein, putative, expressed GO:0009058 biosynthetic process P
LOC_Os10g38000.1 dehydration-responsive element-binding protein, putative, expressed GO:0006139 nucleobase, nucleoside, nucleotide and nucleic acid metabolic process P
LOC_Os10g38000.1 dehydration-responsive element-binding protein, putative, expressed GO:0003700 sequence-specific DNA binding transcription factor activity F
LOC_Os10g38030.1 per1-like family protein, putative, expressed GO:0005623 cell C
LOC_Os10g38030.1 per1-like family protein, putative, expressed GO:0003674 molecular_function F
LOC_Os10g38030.1 per1-like family protein, putative, expressed GO:0008150 biological_process P
LOC_Os10g38040.1 lysM domain containing protein, putative, expressed GO:0005623 cell C
LOC_Os10g38040.1 lysM domain containing protein, putative, expressed GO:0003674 molecular_function F
LOC_Os10g38040.1 lysM domain containing protein, putative, expressed GO:0009056 catabolic process P
LOC_Os10g38050.1 HOTHEAD precursor, putative, expressed GO:0005623 cell C
LOC_Os10g38050.1 HOTHEAD precursor, putative, expressed GO:0003824 catalytic activity F
LOC_Os10g38050.1 HOTHEAD precursor, putative, expressed GO:0008152 metabolic process P
LOC_Os10g38050.1 HOTHEAD precursor, putative, expressed GO:0005488 binding F
LOC_Os10g38060.2 phospholipase D, putative, expressed GO:0016787 hydrolase activity F
LOC_Os10g38060.2 phospholipase D, putative, expressed GO:0008150 biological_process P
LOC_Os10g38060.2 phospholipase D, putative, expressed GO:0008152 metabolic process P
LOC_Os10g38060.2 phospholipase D, putative, expressed GO:0005515 protein binding F
LOC_Os10g38060.2 phospholipase D, putative, expressed GO:0005575 cellular_component C
LOC_Os10g38060.2 phospholipase D, putative, expressed GO:0008289 lipid binding F
LOC_Os10g38060.2 phospholipase D, putative, expressed GO:0006950 response to stress P
LOC_Os10g38060.2 phospholipase D, putative, expressed GO:0009607 response to biotic stimulus P
LOC_Os10g38080.1 OsSub61 - Putative Subtilisin homologue, expressed GO:0016787 hydrolase activity F
LOC_Os10g38080.1 OsSub61 - Putative Subtilisin homologue, expressed GO:0009653 anatomical structure morphogenesis P
LOC_Os10g38080.1 OsSub61 - Putative Subtilisin homologue, expressed GO:0009791 post-embryonic development P
LOC_Os10g38080.1 OsSub61 - Putative Subtilisin homologue, expressed GO:0005886 plasma membrane C
LOC_Os10g38080.1 OsSub61 - Putative Subtilisin homologue, expressed GO:0019538 protein metabolic process P
LOC_Os10g38080.1 OsSub61 - Putative Subtilisin homologue, expressed GO:0008152 metabolic process P
LOC_Os10g38080.1 OsSub61 - Putative Subtilisin homologue, expressed GO:0005618 cell wall C
LOC_Os10g38080.1 OsSub61 - Putative Subtilisin homologue, expressed GO:0009987 cellular process P
LOC_Os10g38090.1 cytochrome P450, putative, expressed GO:0003674 molecular_function F
LOC_Os10g38090.1 cytochrome P450, putative, expressed GO:0005488 binding F
LOC_Os10g38090.1 cytochrome P450, putative, expressed GO:0005783 endoplasmic reticulum C
LOC_Os10g38090.1 cytochrome P450, putative, expressed GO:0003824 catalytic activity F
LOC_Os10g38090.1 cytochrome P450, putative, expressed GO:0008152 metabolic process P
LOC_Os10g38090.1 cytochrome P450, putative, expressed GO:0019825 oxygen binding F
LOC_Os10g38100.1 thaumatin-like protein precursor, putative, expressed GO:0005623 cell C
LOC_Os10g38100.1 thaumatin-like protein precursor, putative, expressed GO:0009607 response to biotic stimulus P
LOC_Os10g38110.1 cytochrome P450, putative, expressed GO:0003674 molecular_function F
LOC_Os10g38110.1 cytochrome P450, putative, expressed GO:0005488 binding F
LOC_Os10g38110.1 cytochrome P450, putative, expressed GO:0005783 endoplasmic reticulum C
LOC_Os10g38110.1 cytochrome P450, putative, expressed GO:0003824 catalytic activity F
LOC_Os10g38110.1 cytochrome P450, putative, expressed GO:0008152 metabolic process P
LOC_Os10g38110.1 cytochrome P450, putative, expressed GO:0019825 oxygen binding F
LOC_Os10g38120.1 cytochrome P450, putative, expressed GO:0005623 cell C
LOC_Os10g38120.1 cytochrome P450, putative, expressed GO:0003674 molecular_function F
LOC_Os10g38120.1 cytochrome P450, putative, expressed GO:0005488 binding F
LOC_Os10g38120.1 cytochrome P450, putative, expressed GO:0003824 catalytic activity F
LOC_Os10g38120.1 cytochrome P450, putative, expressed GO:0008152 metabolic process P
LOC_Os10g38120.1 cytochrome P450, putative, expressed GO:0019825 oxygen binding F
LOC_Os10g38140.1 glutathione S-transferase, putative, expressed GO:0016740 transferase activity F
LOC_Os10g38140.1 glutathione S-transferase, putative, expressed GO:0008152 metabolic process P
LOC_Os10g38140.1 glutathione S-transferase, putative, expressed GO:0009987 cellular process P
LOC_Os10g38140.1 glutathione S-transferase, putative, expressed GO:0009056 catabolic process P
LOC_Os10g38140.1 glutathione S-transferase, putative, expressed GO:0019748 secondary metabolic process P
LOC_Os10g38140.1 glutathione S-transferase, putative, expressed GO:0009628 response to abiotic stimulus P
LOC_Os10g38140.1 glutathione S-transferase, putative, expressed GO:0009719 response to endogenous stimulus P
LOC_Os10g38140.1 glutathione S-transferase, putative, expressed GO:0009791 post-embryonic development P
LOC_Os10g38140.1 glutathione S-transferase, putative, expressed GO:0005737 cytoplasm C
LOC_Os10g38140.1 glutathione S-transferase, putative, expressed GO:0009536 plastid C
LOC_Os10g38150.1 glutathione S-transferase, N-terminal domain containing protein, expressed GO:0016740 transferase activity F
LOC_Os10g38150.1 glutathione S-transferase, N-terminal domain containing protein, expressed GO:0008152 metabolic process P
LOC_Os10g38150.1 glutathione S-transferase, N-terminal domain containing protein, expressed GO:0009987 cellular process P
LOC_Os10g38150.1 glutathione S-transferase, N-terminal domain containing protein, expressed GO:0009056 catabolic process P
LOC_Os10g38150.1 glutathione S-transferase, N-terminal domain containing protein, expressed GO:0019748 secondary metabolic process P
LOC_Os10g38150.1 glutathione S-transferase, N-terminal domain containing protein, expressed GO:0009628 response to abiotic stimulus P
LOC_Os10g38150.1 glutathione S-transferase, N-terminal domain containing protein, expressed GO:0009719 response to endogenous stimulus P
LOC_Os10g38150.1 glutathione S-transferase, N-terminal domain containing protein, expressed GO:0009791 post-embryonic development P
LOC_Os10g38150.1 glutathione S-transferase, N-terminal domain containing protein, expressed GO:0005737 cytoplasm C
LOC_Os10g38150.1 glutathione S-transferase, N-terminal domain containing protein, expressed GO:0009536 plastid C
LOC_Os10g38160.1 glutathione S-transferase, putative, expressed GO:0016740 transferase activity F
LOC_Os10g38160.1 glutathione S-transferase, putative, expressed GO:0008152 metabolic process P
LOC_Os10g38160.1 glutathione S-transferase, putative, expressed GO:0009987 cellular process P
LOC_Os10g38160.1 glutathione S-transferase, putative, expressed GO:0009056 catabolic process P
LOC_Os10g38160.1 glutathione S-transferase, putative, expressed GO:0019748 secondary metabolic process P
LOC_Os10g38160.1 glutathione S-transferase, putative, expressed GO:0009628 response to abiotic stimulus P
LOC_Os10g38160.1 glutathione S-transferase, putative, expressed GO:0009719 response to endogenous stimulus P
LOC_Os10g38160.1 glutathione S-transferase, putative, expressed GO:0009791 post-embryonic development P
LOC_Os10g38160.1 glutathione S-transferase, putative, expressed GO:0005737 cytoplasm C
LOC_Os10g38160.1 glutathione S-transferase, putative, expressed GO:0009536 plastid C
LOC_Os10g38189.1 glutathione S-transferase, putative, expressed GO:0016740 transferase activity F
LOC_Os10g38189.1 glutathione S-transferase, putative, expressed GO:0008152 metabolic process P
LOC_Os10g38189.1 glutathione S-transferase, putative, expressed GO:0009987 cellular process P
LOC_Os10g38189.1 glutathione S-transferase, putative, expressed GO:0009056 catabolic process P
LOC_Os10g38189.1 glutathione S-transferase, putative, expressed GO:0019748 secondary metabolic process P
LOC_Os10g38189.1 glutathione S-transferase, putative, expressed GO:0009628 response to abiotic stimulus P
LOC_Os10g38189.1 glutathione S-transferase, putative, expressed GO:0009719 response to endogenous stimulus P
LOC_Os10g38189.1 glutathione S-transferase, putative, expressed GO:0009791 post-embryonic development P
LOC_Os10g38189.1 glutathione S-transferase, putative, expressed GO:0005737 cytoplasm C
LOC_Os10g38189.1 glutathione S-transferase, putative, expressed GO:0009536 plastid C
LOC_Os10g38206.1 NADPH-dependent oxidoreductase, putative, expressed GO:0003824 catalytic activity F
LOC_Os10g38206.1 NADPH-dependent oxidoreductase, putative, expressed GO:0008152 metabolic process P
LOC_Os10g38206.1 NADPH-dependent oxidoreductase, putative, expressed GO:0015979 photosynthesis P
LOC_Os10g38206.1 NADPH-dependent oxidoreductase, putative, expressed GO:0009536 plastid C
LOC_Os10g38212.1 NADPH-dependent oxidoreductase, putative, expressed GO:0009991 response to extracellular stimulus P
LOC_Os10g38212.1 NADPH-dependent oxidoreductase, putative, expressed GO:0007154 cell communication P
LOC_Os10g38212.1 NADPH-dependent oxidoreductase, putative, expressed GO:0006950 response to stress P
LOC_Os10g38212.1 NADPH-dependent oxidoreductase, putative, expressed GO:0008152 metabolic process P
LOC_Os10g38212.1 NADPH-dependent oxidoreductase, putative, expressed GO:0003824 catalytic activity F
LOC_Os10g38212.1 NADPH-dependent oxidoreductase, putative, expressed GO:0009536 plastid C
LOC_Os10g38214.1 chloroplast 30S ribosomal protein S4, putative, expressed GO:0016020 membrane C
LOC_Os10g38214.1 chloroplast 30S ribosomal protein S4, putative, expressed GO:0005840 ribosome C
LOC_Os10g38214.1 chloroplast 30S ribosomal protein S4, putative, expressed GO:0009536 plastid C
LOC_Os10g38214.1 chloroplast 30S ribosomal protein S4, putative, expressed GO:0006412 translation P
LOC_Os10g38214.1 chloroplast 30S ribosomal protein S4, putative, expressed GO:0005198 structural molecule activity F
LOC_Os10g38216.1 photosystem I assembly protein ycf3, putative, expressed GO:0005515 protein binding F
LOC_Os10g38216.1 photosystem I assembly protein ycf3, putative, expressed GO:0016043 cellular component organization P
LOC_Os10g38216.1 photosystem I assembly protein ycf3, putative, expressed GO:0006091 generation of precursor metabolites and energy P
LOC_Os10g38216.1 photosystem I assembly protein ycf3, putative, expressed GO:0015979 photosynthesis P
LOC_Os10g38216.1 photosystem I assembly protein ycf3, putative, expressed GO:0009536 plastid C
LOC_Os10g38229.1 photosystem I P700 chlorophyll a apoprotein A1, putative, expressed GO:0016020 membrane C
LOC_Os10g38229.1 photosystem I P700 chlorophyll a apoprotein A1, putative, expressed GO:0009536 plastid C
LOC_Os10g38229.1 photosystem I P700 chlorophyll a apoprotein A1, putative, expressed GO:0009579 thylakoid C
LOC_Os10g38229.1 photosystem I P700 chlorophyll a apoprotein A1, putative, expressed GO:0005488 binding F
LOC_Os10g38229.1 photosystem I P700 chlorophyll a apoprotein A1, putative, expressed GO:0015979 photosynthesis P
LOC_Os10g38234.1 photosystem I P700 chlorophyll a apoprotein A2, putative, expressed GO:0006091 generation of precursor metabolites and energy P
LOC_Os10g38234.1 photosystem I P700 chlorophyll a apoprotein A2, putative, expressed GO:0015979 photosynthesis P
LOC_Os10g38234.1 photosystem I P700 chlorophyll a apoprotein A2, putative, expressed GO:0016020 membrane C
LOC_Os10g38234.1 photosystem I P700 chlorophyll a apoprotein A2, putative, expressed GO:0009579 thylakoid C
LOC_Os10g38234.1 photosystem I P700 chlorophyll a apoprotein A2, putative, expressed GO:0009536 plastid C
LOC_Os10g38234.1 photosystem I P700 chlorophyll a apoprotein A2, putative, expressed GO:0005488 binding F
LOC_Os10g38238.1 chloroplast 30S ribosomal protein S14, putative, expressed GO:0005840 ribosome C
LOC_Os10g38238.1 chloroplast 30S ribosomal protein S14, putative, expressed GO:0009536 plastid C
LOC_Os10g38238.1 chloroplast 30S ribosomal protein S14, putative, expressed GO:0006412 translation P
LOC_Os10g38238.1 chloroplast 30S ribosomal protein S14, putative, expressed GO:0005198 structural molecule activity F
LOC_Os10g38272.1 ATP synthase B chain, putative, expressed GO:0016020 membrane C
LOC_Os10g38272.1 ATP synthase B chain, putative, expressed GO:0009536 plastid C
LOC_Os10g38272.1 ATP synthase B chain, putative, expressed GO:0009579 thylakoid C
LOC_Os10g38272.1 ATP synthase B chain, putative, expressed GO:0006810 transport P
LOC_Os10g38272.1 ATP synthase B chain, putative, expressed GO:0006139 nucleobase, nucleoside, nucleotide and nucleic acid metabolic process P
LOC_Os10g38272.1 ATP synthase B chain, putative, expressed GO:0009058 biosynthetic process P
LOC_Os10g38272.1 ATP synthase B chain, putative, expressed GO:0006091 generation of precursor metabolites and energy P
LOC_Os10g38272.1 ATP synthase B chain, putative, expressed GO:0005622 intracellular C
LOC_Os10g38272.1 ATP synthase B chain, putative, expressed GO:0005215 transporter activity F
LOC_Os10g38274.1 ATP synthase C chain, putative, expressed GO:0006810 transport P
LOC_Os10g38274.1 ATP synthase C chain, putative, expressed GO:0009058 biosynthetic process P
LOC_Os10g38274.1 ATP synthase C chain, putative, expressed GO:0006139 nucleobase, nucleoside, nucleotide and nucleic acid metabolic process P
LOC_Os10g38274.1 ATP synthase C chain, putative, expressed GO:0016020 membrane C
LOC_Os10g38274.1 ATP synthase C chain, putative, expressed GO:0009536 plastid C
LOC_Os10g38274.1 ATP synthase C chain, putative, expressed GO:0009579 thylakoid C
LOC_Os10g38274.1 ATP synthase C chain, putative, expressed GO:0005215 transporter activity F
LOC_Os10g38276.1 chloroplast ATP synthase a chain precursor, putative, expressed GO:0016020 membrane C
LOC_Os10g38276.1 chloroplast ATP synthase a chain precursor, putative, expressed GO:0009536 plastid C
LOC_Os10g38276.1 chloroplast ATP synthase a chain precursor, putative, expressed GO:0009579 thylakoid C
LOC_Os10g38276.1 chloroplast ATP synthase a chain precursor, putative, expressed GO:0006810 transport P
LOC_Os10g38276.1 chloroplast ATP synthase a chain precursor, putative, expressed GO:0009987 cellular process P
LOC_Os10g38276.1 chloroplast ATP synthase a chain precursor, putative, expressed GO:0006139 nucleobase, nucleoside, nucleotide and nucleic acid metabolic process P
LOC_Os10g38276.1 chloroplast ATP synthase a chain precursor, putative, expressed GO:0009058 biosynthetic process P
LOC_Os10g38276.1 chloroplast ATP synthase a chain precursor, putative, expressed GO:0005215 transporter activity F
LOC_Os10g38278.1 chloroplast 30S ribosomal protein S2, putative, expressed GO:0016020 membrane C
LOC_Os10g38278.1 chloroplast 30S ribosomal protein S2, putative, expressed GO:0005840 ribosome C
LOC_Os10g38278.1 chloroplast 30S ribosomal protein S2, putative, expressed GO:0009536 plastid C
LOC_Os10g38278.1 chloroplast 30S ribosomal protein S2, putative, expressed GO:0006412 translation P
LOC_Os10g38278.1 chloroplast 30S ribosomal protein S2, putative, expressed GO:0005198 structural molecule activity F
LOC_Os10g38314.1 glutathione S-transferase, N-terminal domain containing protein, expressed GO:0016740 transferase activity F
LOC_Os10g38314.1 glutathione S-transferase, N-terminal domain containing protein, expressed GO:0008152 metabolic process P
LOC_Os10g38314.1 glutathione S-transferase, N-terminal domain containing protein, expressed GO:0009987 cellular process P
LOC_Os10g38314.1 glutathione S-transferase, N-terminal domain containing protein, expressed GO:0009056 catabolic process P
LOC_Os10g38314.1 glutathione S-transferase, N-terminal domain containing protein, expressed GO:0019748 secondary metabolic process P
LOC_Os10g38314.1 glutathione S-transferase, N-terminal domain containing protein, expressed GO:0009628 response to abiotic stimulus P
LOC_Os10g38314.1 glutathione S-transferase, N-terminal domain containing protein, expressed GO:0009719 response to endogenous stimulus P
LOC_Os10g38314.1 glutathione S-transferase, N-terminal domain containing protein, expressed GO:0009791 post-embryonic development P
LOC_Os10g38314.1 glutathione S-transferase, N-terminal domain containing protein, expressed GO:0005737 cytoplasm C
LOC_Os10g38314.1 glutathione S-transferase, N-terminal domain containing protein, expressed GO:0009536 plastid C
LOC_Os10g38340.1 glutathione S-transferase GSTU6, putative, expressed GO:0016740 transferase activity F
LOC_Os10g38340.1 glutathione S-transferase GSTU6, putative, expressed GO:0008152 metabolic process P
LOC_Os10g38340.1 glutathione S-transferase GSTU6, putative, expressed GO:0009987 cellular process P
LOC_Os10g38340.1 glutathione S-transferase GSTU6, putative, expressed GO:0009056 catabolic process P
LOC_Os10g38340.1 glutathione S-transferase GSTU6, putative, expressed GO:0019748 secondary metabolic process P
LOC_Os10g38340.1 glutathione S-transferase GSTU6, putative, expressed GO:0009628 response to abiotic stimulus P
LOC_Os10g38340.1 glutathione S-transferase GSTU6, putative, expressed GO:0009719 response to endogenous stimulus P
LOC_Os10g38340.1 glutathione S-transferase GSTU6, putative, expressed GO:0009791 post-embryonic development P
LOC_Os10g38340.1 glutathione S-transferase GSTU6, putative, expressed GO:0005737 cytoplasm C
LOC_Os10g38340.1 glutathione S-transferase GSTU6, putative, expressed GO:0009536 plastid C
LOC_Os10g38350.1 glutathione S-transferase, putative, expressed GO:0016740 transferase activity F
LOC_Os10g38350.1 glutathione S-transferase, putative, expressed GO:0008152 metabolic process P
LOC_Os10g38350.1 glutathione S-transferase, putative, expressed GO:0009987 cellular process P
LOC_Os10g38350.1 glutathione S-transferase, putative, expressed GO:0009056 catabolic process P
LOC_Os10g38350.1 glutathione S-transferase, putative, expressed GO:0019748 secondary metabolic process P
LOC_Os10g38350.1 glutathione S-transferase, putative, expressed GO:0009628 response to abiotic stimulus P
LOC_Os10g38350.1 glutathione S-transferase, putative, expressed GO:0009719 response to endogenous stimulus P
LOC_Os10g38350.1 glutathione S-transferase, putative, expressed GO:0009791 post-embryonic development P
LOC_Os10g38350.1 glutathione S-transferase, putative, expressed GO:0005737 cytoplasm C
LOC_Os10g38350.1 glutathione S-transferase, putative, expressed GO:0009536 plastid C
LOC_Os10g38360.1 glutathione S-transferase, putative, expressed GO:0016740 transferase activity F
LOC_Os10g38360.1 glutathione S-transferase, putative, expressed GO:0009056 catabolic process P
LOC_Os10g38360.1 glutathione S-transferase, putative, expressed GO:0009987 cellular process P
LOC_Os10g38360.1 glutathione S-transferase, putative, expressed GO:0019748 secondary metabolic process P
LOC_Os10g38360.1 glutathione S-transferase, putative, expressed GO:0008152 metabolic process P
LOC_Os10g38360.1 glutathione S-transferase, putative, expressed GO:0005737 cytoplasm C
LOC_Os10g38450.1 receptor-like protein kinase 2 precursor, putative, expressed GO:0005623 cell C
LOC_Os10g38450.1 receptor-like protein kinase 2 precursor, putative, expressed GO:0007165 signal transduction P
LOC_Os10g38450.1 receptor-like protein kinase 2 precursor, putative, expressed GO:0016301 kinase activity F
LOC_Os10g38450.1 receptor-like protein kinase 2 precursor, putative, expressed GO:0000166 nucleotide binding F
LOC_Os10g38450.1 receptor-like protein kinase 2 precursor, putative, expressed GO:0006464 protein modification process P
LOC_Os10g38470.1 glutathione S-transferase, putative, expressed GO:0016740 transferase activity F
LOC_Os10g38470.1 glutathione S-transferase, putative, expressed GO:0009056 catabolic process P
LOC_Os10g38470.1 glutathione S-transferase, putative, expressed GO:0009987 cellular process P
LOC_Os10g38470.1 glutathione S-transferase, putative, expressed GO:0019748 secondary metabolic process P
LOC_Os10g38470.1 glutathione S-transferase, putative, expressed GO:0008152 metabolic process P
LOC_Os10g38470.1 glutathione S-transferase, putative, expressed GO:0005737 cytoplasm C
LOC_Os10g38489.1 glutathione S-transferase GSTU6, putative, expressed GO:0016740 transferase activity F
LOC_Os10g38489.1 glutathione S-transferase GSTU6, putative, expressed GO:0008152 metabolic process P
LOC_Os10g38489.1 glutathione S-transferase GSTU6, putative, expressed GO:0009987 cellular process P
LOC_Os10g38489.1 glutathione S-transferase GSTU6, putative, expressed GO:0009056 catabolic process P
LOC_Os10g38489.1 glutathione S-transferase GSTU6, putative, expressed GO:0019748 secondary metabolic process P
LOC_Os10g38489.1 glutathione S-transferase GSTU6, putative, expressed GO:0009628 response to abiotic stimulus P
LOC_Os10g38489.1 glutathione S-transferase GSTU6, putative, expressed GO:0009719 response to endogenous stimulus P
LOC_Os10g38489.1 glutathione S-transferase GSTU6, putative, expressed GO:0009791 post-embryonic development P
LOC_Os10g38489.1 glutathione S-transferase GSTU6, putative, expressed GO:0005737 cytoplasm C
LOC_Os10g38489.1 glutathione S-transferase GSTU6, putative, expressed GO:0009536 plastid C
LOC_Os10g38540.1 glutathione S-transferase, putative, expressed GO:0016740 transferase activity F
LOC_Os10g38540.1 glutathione S-transferase, putative, expressed GO:0009056 catabolic process P
LOC_Os10g38540.1 glutathione S-transferase, putative, expressed GO:0009987 cellular process P
LOC_Os10g38540.1 glutathione S-transferase, putative, expressed GO:0019748 secondary metabolic process P
LOC_Os10g38540.1 glutathione S-transferase, putative, expressed GO:0008152 metabolic process P
LOC_Os10g38540.1 glutathione S-transferase, putative, expressed GO:0005737 cytoplasm C
LOC_Os10g38580.1 glutathione S-transferase, putative, expressed GO:0016740 transferase activity F
LOC_Os10g38580.1 glutathione S-transferase, putative, expressed GO:0009056 catabolic process P
LOC_Os10g38580.1 glutathione S-transferase, putative, expressed GO:0009987 cellular process P
LOC_Os10g38580.1 glutathione S-transferase, putative, expressed GO:0019748 secondary metabolic process P
LOC_Os10g38580.1 glutathione S-transferase, putative, expressed GO:0008152 metabolic process P
LOC_Os10g38580.1 glutathione S-transferase, putative, expressed GO:0005737 cytoplasm C
LOC_Os10g38590.2 glutathione S-transferase, N-terminal domain containing protein, expressed GO:0016740 transferase activity F
LOC_Os10g38590.2 glutathione S-transferase, N-terminal domain containing protein, expressed GO:0009056 catabolic process P
LOC_Os10g38590.2 glutathione S-transferase, N-terminal domain containing protein, expressed GO:0009987 cellular process P
LOC_Os10g38590.2 glutathione S-transferase, N-terminal domain containing protein, expressed GO:0019748 secondary metabolic process P
LOC_Os10g38590.2 glutathione S-transferase, N-terminal domain containing protein, expressed GO:0008152 metabolic process P
LOC_Os10g38590.2 glutathione S-transferase, N-terminal domain containing protein, expressed GO:0005737 cytoplasm C
LOC_Os10g38600.1 glutathione S-transferase GSTU6, putative, expressed GO:0016740 transferase activity F
LOC_Os10g38600.1 glutathione S-transferase GSTU6, putative, expressed GO:0009056 catabolic process P
LOC_Os10g38600.1 glutathione S-transferase GSTU6, putative, expressed GO:0009987 cellular process P
LOC_Os10g38600.1 glutathione S-transferase GSTU6, putative, expressed GO:0019748 secondary metabolic process P
LOC_Os10g38600.1 glutathione S-transferase GSTU6, putative, expressed GO:0008152 metabolic process P
LOC_Os10g38600.1 glutathione S-transferase GSTU6, putative, expressed GO:0005737 cytoplasm C
LOC_Os10g38610.1 glutathione S-transferase, putative, expressed GO:0016740 transferase activity F
LOC_Os10g38610.1 glutathione S-transferase, putative, expressed GO:0009056 catabolic process P
LOC_Os10g38610.1 glutathione S-transferase, putative, expressed GO:0009987 cellular process P
LOC_Os10g38610.1 glutathione S-transferase, putative, expressed GO:0019748 secondary metabolic process P
LOC_Os10g38610.1 glutathione S-transferase, putative, expressed GO:0008152 metabolic process P
LOC_Os10g38610.1 glutathione S-transferase, putative, expressed GO:0005737 cytoplasm C
LOC_Os10g38630.1 glutathione S-transferase, putative, expressed GO:0016740 transferase activity F
LOC_Os10g38630.1 glutathione S-transferase, putative, expressed GO:0009056 catabolic process P
LOC_Os10g38630.1 glutathione S-transferase, putative, expressed GO:0009987 cellular process P
LOC_Os10g38630.1 glutathione S-transferase, putative, expressed GO:0019748 secondary metabolic process P
LOC_Os10g38630.1 glutathione S-transferase, putative, expressed GO:0008152 metabolic process P
LOC_Os10g38630.1 glutathione S-transferase, putative, expressed GO:0005737 cytoplasm C
LOC_Os10g38640.1 glutathione S-transferase, putative, expressed GO:0016740 transferase activity F
LOC_Os10g38640.1 glutathione S-transferase, putative, expressed GO:0008152 metabolic process P
LOC_Os10g38640.1 glutathione S-transferase, putative, expressed GO:0009987 cellular process P
LOC_Os10g38640.1 glutathione S-transferase, putative, expressed GO:0009056 catabolic process P
LOC_Os10g38640.1 glutathione S-transferase, putative, expressed GO:0019748 secondary metabolic process P
LOC_Os10g38640.1 glutathione S-transferase, putative, expressed GO:0009628 response to abiotic stimulus P
LOC_Os10g38640.1 glutathione S-transferase, putative, expressed GO:0009719 response to endogenous stimulus P
LOC_Os10g38640.1 glutathione S-transferase, putative, expressed GO:0009791 post-embryonic development P
LOC_Os10g38640.1 glutathione S-transferase, putative, expressed GO:0005737 cytoplasm C
LOC_Os10g38640.1 glutathione S-transferase, putative, expressed GO:0009536 plastid C
LOC_Os10g38660.1 glutathione S-transferase, putative, expressed GO:0016740 transferase activity F
LOC_Os10g38660.1 glutathione S-transferase, putative, expressed GO:0008152 metabolic process P
LOC_Os10g38660.1 glutathione S-transferase, putative, expressed GO:0009987 cellular process P
LOC_Os10g38660.1 glutathione S-transferase, putative, expressed GO:0009056 catabolic process P
LOC_Os10g38660.1 glutathione S-transferase, putative, expressed GO:0019748 secondary metabolic process P
LOC_Os10g38660.1 glutathione S-transferase, putative, expressed GO:0009628 response to abiotic stimulus P
LOC_Os10g38660.1 glutathione S-transferase, putative, expressed GO:0009719 response to endogenous stimulus P
LOC_Os10g38660.1 glutathione S-transferase, putative, expressed GO:0009791 post-embryonic development P
LOC_Os10g38660.1 glutathione S-transferase, putative, expressed GO:0005737 cytoplasm C
LOC_Os10g38660.1 glutathione S-transferase, putative, expressed GO:0009536 plastid C
LOC_Os10g38670.1 glutathione S-transferase, putative, expressed GO:0016740 transferase activity F
LOC_Os10g38670.1 glutathione S-transferase, putative, expressed GO:0008152 metabolic process P
LOC_Os10g38670.1 glutathione S-transferase, putative, expressed GO:0009987 cellular process P
LOC_Os10g38670.1 glutathione S-transferase, putative, expressed GO:0009056 catabolic process P
LOC_Os10g38670.1 glutathione S-transferase, putative, expressed GO:0019748 secondary metabolic process P
LOC_Os10g38670.1 glutathione S-transferase, putative, expressed GO:0009628 response to abiotic stimulus P
LOC_Os10g38670.1 glutathione S-transferase, putative, expressed GO:0009719 response to endogenous stimulus P
LOC_Os10g38670.1 glutathione S-transferase, putative, expressed GO:0009791 post-embryonic development P
LOC_Os10g38670.1 glutathione S-transferase, putative, expressed GO:0005737 cytoplasm C
LOC_Os10g38670.1 glutathione S-transferase, putative, expressed GO:0009536 plastid C
LOC_Os10g38690.1 glutathione S-transferase, putative, expressed GO:0016740 transferase activity F
LOC_Os10g38690.1 glutathione S-transferase, putative, expressed GO:0009056 catabolic process P
LOC_Os10g38690.1 glutathione S-transferase, putative, expressed GO:0009987 cellular process P
LOC_Os10g38690.1 glutathione S-transferase, putative, expressed GO:0019748 secondary metabolic process P
LOC_Os10g38690.1 glutathione S-transferase, putative, expressed GO:0008152 metabolic process P
LOC_Os10g38690.1 glutathione S-transferase, putative, expressed GO:0005737 cytoplasm C
LOC_Os10g38700.1 glutathione S-transferase, putative, expressed GO:0016740 transferase activity F
LOC_Os10g38700.1 glutathione S-transferase, putative, expressed GO:0008152 metabolic process P
LOC_Os10g38700.1 glutathione S-transferase, putative, expressed GO:0009987 cellular process P
LOC_Os10g38700.1 glutathione S-transferase, putative, expressed GO:0009056 catabolic process P
LOC_Os10g38700.1 glutathione S-transferase, putative, expressed GO:0019748 secondary metabolic process P
LOC_Os10g38700.1 glutathione S-transferase, putative, expressed GO:0009628 response to abiotic stimulus P
LOC_Os10g38700.1 glutathione S-transferase, putative, expressed GO:0009719 response to endogenous stimulus P
LOC_Os10g38700.1 glutathione S-transferase, putative, expressed GO:0009791 post-embryonic development P
LOC_Os10g38700.1 glutathione S-transferase, putative, expressed GO:0005737 cytoplasm C
LOC_Os10g38700.1 glutathione S-transferase, putative, expressed GO:0009536 plastid C
LOC_Os10g38710.1 glutathione S-transferase, putative, expressed GO:0016740 transferase activity F
LOC_Os10g38710.1 glutathione S-transferase, putative, expressed GO:0008152 metabolic process P
LOC_Os10g38710.1 glutathione S-transferase, putative, expressed GO:0009987 cellular process P
LOC_Os10g38710.1 glutathione S-transferase, putative, expressed GO:0009056 catabolic process P
LOC_Os10g38710.1 glutathione S-transferase, putative, expressed GO:0019748 secondary metabolic process P
LOC_Os10g38710.1 glutathione S-transferase, putative, expressed GO:0009628 response to abiotic stimulus P
LOC_Os10g38710.1 glutathione S-transferase, putative, expressed GO:0009719 response to endogenous stimulus P
LOC_Os10g38710.1 glutathione S-transferase, putative, expressed GO:0009791 post-embryonic development P
LOC_Os10g38710.1 glutathione S-transferase, putative, expressed GO:0005737 cytoplasm C
LOC_Os10g38710.1 glutathione S-transferase, putative, expressed GO:0009536 plastid C
LOC_Os10g38720.1 glutathione S-transferase, putative, expressed GO:0016740 transferase activity F
LOC_Os10g38720.1 glutathione S-transferase, putative, expressed GO:0008152 metabolic process P
LOC_Os10g38720.1 glutathione S-transferase, putative, expressed GO:0009987 cellular process P
LOC_Os10g38720.1 glutathione S-transferase, putative, expressed GO:0009056 catabolic process P
LOC_Os10g38720.1 glutathione S-transferase, putative, expressed GO:0019748 secondary metabolic process P
LOC_Os10g38720.1 glutathione S-transferase, putative, expressed GO:0009628 response to abiotic stimulus P
LOC_Os10g38720.1 glutathione S-transferase, putative, expressed GO:0009719 response to endogenous stimulus P
LOC_Os10g38720.1 glutathione S-transferase, putative, expressed GO:0009791 post-embryonic development P
LOC_Os10g38720.1 glutathione S-transferase, putative, expressed GO:0005737 cytoplasm C
LOC_Os10g38720.1 glutathione S-transferase, putative, expressed GO:0009536 plastid C
LOC_Os10g38730.1 glutathione S-transferase, putative, expressed GO:0016740 transferase activity F
LOC_Os10g38730.1 glutathione S-transferase, putative, expressed GO:0008152 metabolic process P
LOC_Os10g38730.1 glutathione S-transferase, putative, expressed GO:0009987 cellular process P
LOC_Os10g38730.1 glutathione S-transferase, putative, expressed GO:0009056 catabolic process P
LOC_Os10g38730.1 glutathione S-transferase, putative, expressed GO:0019748 secondary metabolic process P
LOC_Os10g38730.1 glutathione S-transferase, putative, expressed GO:0009628 response to abiotic stimulus P
LOC_Os10g38730.1 glutathione S-transferase, putative, expressed GO:0009719 response to endogenous stimulus P
LOC_Os10g38730.1 glutathione S-transferase, putative, expressed GO:0009791 post-embryonic development P
LOC_Os10g38730.1 glutathione S-transferase, putative, expressed GO:0005737 cytoplasm C
LOC_Os10g38730.1 glutathione S-transferase, putative, expressed GO:0009536 plastid C
LOC_Os10g38740.1 glutathione S-transferase, putative, expressed GO:0016740 transferase activity F
LOC_Os10g38740.1 glutathione S-transferase, putative, expressed GO:0008152 metabolic process P
LOC_Os10g38740.1 glutathione S-transferase, putative, expressed GO:0009987 cellular process P
LOC_Os10g38740.1 glutathione S-transferase, putative, expressed GO:0009056 catabolic process P
LOC_Os10g38740.1 glutathione S-transferase, putative, expressed GO:0019748 secondary metabolic process P
LOC_Os10g38740.1 glutathione S-transferase, putative, expressed GO:0009628 response to abiotic stimulus P
LOC_Os10g38740.1 glutathione S-transferase, putative, expressed GO:0009719 response to endogenous stimulus P
LOC_Os10g38740.1 glutathione S-transferase, putative, expressed GO:0009791 post-embryonic development P
LOC_Os10g38740.1 glutathione S-transferase, putative, expressed GO:0005737 cytoplasm C
LOC_Os10g38740.1 glutathione S-transferase, putative, expressed GO:0009536 plastid C
LOC_Os10g38770.1 GRF zinc finger family protein, expressed GO:0005575 cellular_component C
LOC_Os10g38770.1 GRF zinc finger family protein, expressed GO:0005488 binding F
LOC_Os10g38770.1 GRF zinc finger family protein, expressed GO:0008150 biological_process P
LOC_Os10g38770.1 GRF zinc finger family protein, expressed GO:0003676 nucleic acid binding F
LOC_Os10g38780.1 glutathione S-transferase, putative, expressed GO:0016740 transferase activity F
LOC_Os10g38780.1 glutathione S-transferase, putative, expressed GO:0008152 metabolic process P
LOC_Os10g38780.1 glutathione S-transferase, putative, expressed GO:0009987 cellular process P
LOC_Os10g38780.1 glutathione S-transferase, putative, expressed GO:0009056 catabolic process P
LOC_Os10g38780.1 glutathione S-transferase, putative, expressed GO:0019748 secondary metabolic process P
LOC_Os10g38780.1 glutathione S-transferase, putative, expressed GO:0009628 response to abiotic stimulus P
LOC_Os10g38780.1 glutathione S-transferase, putative, expressed GO:0009719 response to endogenous stimulus P
LOC_Os10g38780.1 glutathione S-transferase, putative, expressed GO:0009791 post-embryonic development P
LOC_Os10g38780.1 glutathione S-transferase, putative, expressed GO:0005737 cytoplasm C
LOC_Os10g38780.1 glutathione S-transferase, putative, expressed GO:0009536 plastid C
LOC_Os10g38800.1 leucine-rich repeat transmembrane protein kinase, putative, expressed GO:0007165 signal transduction P
LOC_Os10g38800.1 leucine-rich repeat transmembrane protein kinase, putative, expressed GO:0016301 kinase activity F
LOC_Os10g38800.1 leucine-rich repeat transmembrane protein kinase, putative, expressed GO:0000166 nucleotide binding F
LOC_Os10g38800.1 leucine-rich repeat transmembrane protein kinase, putative, expressed GO:0006464 protein modification process P
LOC_Os10g38800.1 leucine-rich repeat transmembrane protein kinase, putative, expressed GO:0005886 plasma membrane C
LOC_Os10g38820.1 bZIP family transcription factor, putative, expressed GO:0003677 DNA binding F
LOC_Os10g38820.1 bZIP family transcription factor, putative, expressed GO:0009058 biosynthetic process P
LOC_Os10g38820.1 bZIP family transcription factor, putative, expressed GO:0006139 nucleobase, nucleoside, nucleotide and nucleic acid metabolic process P
LOC_Os10g38820.1 bZIP family transcription factor, putative, expressed GO:0005829 cytosol C
LOC_Os10g38820.1 bZIP family transcription factor, putative, expressed GO:0003700 sequence-specific DNA binding transcription factor activity F
LOC_Os10g38834.1 no apical meristem protein, putative, expressed GO:0005634 nucleus C
LOC_Os10g38834.1 no apical meristem protein, putative, expressed GO:0009058 biosynthetic process P
LOC_Os10g38834.1 no apical meristem protein, putative, expressed GO:0006139 nucleobase, nucleoside, nucleotide and nucleic acid metabolic process P
LOC_Os10g38834.1 no apical meristem protein, putative, expressed GO:0003700 sequence-specific DNA binding transcription factor activity F
LOC_Os10g38850.1 amine oxidase, putative, expressed GO:0003824 catalytic activity F
LOC_Os10g38850.1 amine oxidase, putative, expressed GO:0008152 metabolic process P
LOC_Os10g38860.1 hydrolase, alpha/beta fold family domain containing protein, expressed GO:0005623 cell C
LOC_Os10g38860.1 hydrolase, alpha/beta fold family domain containing protein, expressed GO:0008152 metabolic process P
LOC_Os10g38860.1 hydrolase, alpha/beta fold family domain containing protein, expressed GO:0016787 hydrolase activity F
LOC_Os10g38870.1 heavy metal-associated domain containing protein, expressed GO:0005575 cellular_component C
LOC_Os10g38870.1 heavy metal-associated domain containing protein, expressed GO:0005488 binding F
LOC_Os10g38870.1 heavy metal-associated domain containing protein, expressed GO:0006810 transport P
LOC_Os10g38880.1 DUF623 domain containing protein, expressed GO:0003674 molecular_function F
LOC_Os10g38880.1 DUF623 domain containing protein, expressed GO:0005575 cellular_component C
LOC_Os10g38880.1 DUF623 domain containing protein, expressed GO:0008150 biological_process P
LOC_Os10g38900.1 erythronate-4-phosphate dehydrogenase, putative, expressed GO:0016043 cellular component organization P
LOC_Os10g38900.1 erythronate-4-phosphate dehydrogenase, putative, expressed GO:0009653 anatomical structure morphogenesis P
LOC_Os10g38900.1 erythronate-4-phosphate dehydrogenase, putative, expressed GO:0030154 cell differentiation P
LOC_Os10g38900.1 erythronate-4-phosphate dehydrogenase, putative, expressed GO:0007275 multicellular organismal development P
LOC_Os10g38900.1 erythronate-4-phosphate dehydrogenase, putative, expressed GO:0000003 reproduction P
LOC_Os10g38900.1 erythronate-4-phosphate dehydrogenase, putative, expressed GO:0009791 post-embryonic development P
LOC_Os10g38900.1 erythronate-4-phosphate dehydrogenase, putative, expressed GO:0009987 cellular process P
LOC_Os10g38900.1 erythronate-4-phosphate dehydrogenase, putative, expressed GO:0007267 cell-cell signaling P
LOC_Os10g38900.1 erythronate-4-phosphate dehydrogenase, putative, expressed GO:0005515 protein binding F
LOC_Os10g38900.1 erythronate-4-phosphate dehydrogenase, putative, expressed GO:0005829 cytosol C
LOC_Os10g38900.1 erythronate-4-phosphate dehydrogenase, putative, expressed GO:0009908 flower development P
LOC_Os10g38900.1 erythronate-4-phosphate dehydrogenase, putative, expressed GO:0016049 cell growth P
LOC_Os10g38910.1 expressed protein GO:0003674 molecular_function F
LOC_Os10g38910.1 expressed protein GO:0016020 membrane C
LOC_Os10g38910.1 expressed protein GO:0009536 plastid C
LOC_Os10g38910.1 expressed protein GO:0009579 thylakoid C
LOC_Os10g38910.1 expressed protein GO:0008150 biological_process P
LOC_Os10g38920.1 protein kinase domain containing protein, expressed GO:0008152 metabolic process P
LOC_Os10g38920.1 protein kinase domain containing protein, expressed GO:0009987 cellular process P
LOC_Os10g38920.1 protein kinase domain containing protein, expressed GO:0016301 kinase activity F
LOC_Os10g38920.1 protein kinase domain containing protein, expressed GO:0005886 plasma membrane C
LOC_Os10g38920.1 protein kinase domain containing protein, expressed GO:0006464 protein modification process P
LOC_Os10g38930.1 shikimate/quinate 5-dehydrogenase, putative, expressed GO:0005198 structural molecule activity F
LOC_Os10g38930.1 shikimate/quinate 5-dehydrogenase, putative, expressed GO:0009987 cellular process P
LOC_Os10g38930.1 shikimate/quinate 5-dehydrogenase, putative, expressed GO:0009056 catabolic process P
LOC_Os10g38930.1 shikimate/quinate 5-dehydrogenase, putative, expressed GO:0008152 metabolic process P
LOC_Os10g38930.1 shikimate/quinate 5-dehydrogenase, putative, expressed GO:0003824 catalytic activity F
LOC_Os10g38930.1 shikimate/quinate 5-dehydrogenase, putative, expressed GO:0005488 binding F
LOC_Os10g38930.1 shikimate/quinate 5-dehydrogenase, putative, expressed GO:0009536 plastid C
LOC_Os10g38940.1 fatty acid hydroxylase, putative, expressed GO:0009058 biosynthetic process P
LOC_Os10g38940.1 fatty acid hydroxylase, putative, expressed GO:0009987 cellular process P
LOC_Os10g38940.1 fatty acid hydroxylase, putative, expressed GO:0006629 lipid metabolic process P
LOC_Os10g38940.1 fatty acid hydroxylase, putative, expressed GO:0005783 endoplasmic reticulum C
LOC_Os10g38940.1 fatty acid hydroxylase, putative, expressed GO:0003824 catalytic activity F
LOC_Os10g38940.1 fatty acid hydroxylase, putative, expressed GO:0008152 metabolic process P
LOC_Os10g38940.1 fatty acid hydroxylase, putative, expressed GO:0009536 plastid C
LOC_Os10g38950.1 CGMC_MAPKCMGC_2_ERK.14 - CGMC includes CDA, MAPK, GSK3, and CLKC kinases, expressed GO:0016043 cellular component organization P
LOC_Os10g38950.1 CGMC_MAPKCMGC_2_ERK.14 - CGMC includes CDA, MAPK, GSK3, and CLKC kinases, expressed GO:0009987 cellular process P
LOC_Os10g38950.1 CGMC_MAPKCMGC_2_ERK.14 - CGMC includes CDA, MAPK, GSK3, and CLKC kinases, expressed GO:0008152 metabolic process P
LOC_Os10g38950.1 CGMC_MAPKCMGC_2_ERK.14 - CGMC includes CDA, MAPK, GSK3, and CLKC kinases, expressed GO:0009607 response to biotic stimulus P
LOC_Os10g38950.1 CGMC_MAPKCMGC_2_ERK.14 - CGMC includes CDA, MAPK, GSK3, and CLKC kinases, expressed GO:0006950 response to stress P
LOC_Os10g38950.1 CGMC_MAPKCMGC_2_ERK.14 - CGMC includes CDA, MAPK, GSK3, and CLKC kinases, expressed GO:0005737 cytoplasm C
LOC_Os10g38950.1 CGMC_MAPKCMGC_2_ERK.14 - CGMC includes CDA, MAPK, GSK3, and CLKC kinases, expressed GO:0009628 response to abiotic stimulus P
LOC_Os10g38950.1 CGMC_MAPKCMGC_2_ERK.14 - CGMC includes CDA, MAPK, GSK3, and CLKC kinases, expressed GO:0005515 protein binding F
LOC_Os10g38950.1 CGMC_MAPKCMGC_2_ERK.14 - CGMC includes CDA, MAPK, GSK3, and CLKC kinases, expressed GO:0005829 cytosol C
LOC_Os10g38950.1 CGMC_MAPKCMGC_2_ERK.14 - CGMC includes CDA, MAPK, GSK3, and CLKC kinases, expressed GO:0016301 kinase activity F
LOC_Os10g38950.1 CGMC_MAPKCMGC_2_ERK.14 - CGMC includes CDA, MAPK, GSK3, and CLKC kinases, expressed GO:0004871 signal transducer activity F
LOC_Os10g38950.1 CGMC_MAPKCMGC_2_ERK.14 - CGMC includes CDA, MAPK, GSK3, and CLKC kinases, expressed GO:0005634 nucleus C
LOC_Os10g38950.1 CGMC_MAPKCMGC_2_ERK.14 - CGMC includes CDA, MAPK, GSK3, and CLKC kinases, expressed GO:0007165 signal transduction P
LOC_Os10g38950.1 CGMC_MAPKCMGC_2_ERK.14 - CGMC includes CDA, MAPK, GSK3, and CLKC kinases, expressed GO:0006464 protein modification process P
LOC_Os10g38950.1 CGMC_MAPKCMGC_2_ERK.14 - CGMC includes CDA, MAPK, GSK3, and CLKC kinases, expressed GO:0009719 response to endogenous stimulus P
LOC_Os10g38960.1 lectin-like receptor kinase, putative, expressed GO:0008152 metabolic process P
LOC_Os10g38960.1 lectin-like receptor kinase, putative, expressed GO:0009987 cellular process P
LOC_Os10g38960.1 lectin-like receptor kinase, putative, expressed GO:0009719 response to endogenous stimulus P
LOC_Os10g38960.1 lectin-like receptor kinase, putative, expressed GO:0007165 signal transduction P
LOC_Os10g38960.1 lectin-like receptor kinase, putative, expressed GO:0000166 nucleotide binding F
LOC_Os10g38960.1 lectin-like receptor kinase, putative, expressed GO:0016301 kinase activity F
LOC_Os10g38960.1 lectin-like receptor kinase, putative, expressed GO:0009791 post-embryonic development P
LOC_Os10g38960.1 lectin-like receptor kinase, putative, expressed GO:0006464 protein modification process P
LOC_Os10g38960.1 lectin-like receptor kinase, putative, expressed GO:0005488 binding F
LOC_Os10g38970.1 ethylene-responsive element-binding protein, putative, expressed GO:0003674 molecular_function F
LOC_Os10g38970.1 ethylene-responsive element-binding protein, putative, expressed GO:0008150 biological_process P
LOC_Os10g38980.1 expressed protein GO:0003674 molecular_function F
LOC_Os10g38980.1 expressed protein GO:0005575 cellular_component C
LOC_Os10g38980.1 expressed protein GO:0008150 biological_process P
LOC_Os10g39010.2 TKL_IRAK_CrRLK1L-1.16 - The CrRLK1L-1 subfamily has homology to the CrRLK1L homolog, expressed GO:0008152 metabolic process P
LOC_Os10g39010.2 TKL_IRAK_CrRLK1L-1.16 - The CrRLK1L-1 subfamily has homology to the CrRLK1L homolog, expressed GO:0009987 cellular process P
LOC_Os10g39010.2 TKL_IRAK_CrRLK1L-1.16 - The CrRLK1L-1 subfamily has homology to the CrRLK1L homolog, expressed GO:0016301 kinase activity F
LOC_Os10g39010.2 TKL_IRAK_CrRLK1L-1.16 - The CrRLK1L-1 subfamily has homology to the CrRLK1L homolog, expressed GO:0000166 nucleotide binding F
LOC_Os10g39010.2 TKL_IRAK_CrRLK1L-1.16 - The CrRLK1L-1 subfamily has homology to the CrRLK1L homolog, expressed GO:0005575 cellular_component C
LOC_Os10g39010.2 TKL_IRAK_CrRLK1L-1.16 - The CrRLK1L-1 subfamily has homology to the CrRLK1L homolog, expressed GO:0006464 protein modification process P
LOC_Os10g39010.2 TKL_IRAK_CrRLK1L-1.16 - The CrRLK1L-1 subfamily has homology to the CrRLK1L homolog, expressed GO:0005886 plasma membrane C
LOC_Os10g39020.2 fringe-related protein, putative, expressed GO:0016740 transferase activity F
LOC_Os10g39020.2 fringe-related protein, putative, expressed GO:0008152 metabolic process P
LOC_Os10g39020.2 fringe-related protein, putative, expressed GO:0008150 biological_process P
LOC_Os10g39030.1 homeobox domain containing protein, expressed GO:0003677 DNA binding F
LOC_Os10g39030.1 homeobox domain containing protein, expressed GO:0005634 nucleus C
LOC_Os10g39030.1 homeobox domain containing protein, expressed GO:0005575 cellular_component C
LOC_Os10g39030.1 homeobox domain containing protein, expressed GO:0009058 biosynthetic process P
LOC_Os10g39030.1 homeobox domain containing protein, expressed GO:0006139 nucleobase, nucleoside, nucleotide and nucleic acid metabolic process P
LOC_Os10g39030.1 homeobox domain containing protein, expressed GO:0009908 flower development P
LOC_Os10g39030.1 homeobox domain containing protein, expressed GO:0005515 protein binding F
LOC_Os10g39030.1 homeobox domain containing protein, expressed GO:0005829 cytosol C
LOC_Os10g39030.1 homeobox domain containing protein, expressed GO:0003700 sequence-specific DNA binding transcription factor activity F
LOC_Os10g39090.1 hydrolase, alpha/beta fold family protein, putative, expressed GO:0003674 molecular_function F
LOC_Os10g39090.1 hydrolase, alpha/beta fold family protein, putative, expressed GO:0005575 cellular_component C
LOC_Os10g39090.1 hydrolase, alpha/beta fold family protein, putative, expressed GO:0009991 response to extracellular stimulus P
LOC_Os10g39090.1 hydrolase, alpha/beta fold family protein, putative, expressed GO:0007154 cell communication P
LOC_Os10g39090.1 hydrolase, alpha/beta fold family protein, putative, expressed GO:0006950 response to stress P
LOC_Os10g39100.1 uncharacterized Cys-rich domain containing protein, putative, expressed GO:0016020 membrane C
LOC_Os10g39100.1 uncharacterized Cys-rich domain containing protein, putative, expressed GO:0005886 plasma membrane C
LOC_Os10g39110.1 expansin precursor, putative, expressed GO:0005623 cell C
LOC_Os10g39110.1 expansin precursor, putative, expressed GO:0016043 cellular component organization P
LOC_Os10g39110.1 expansin precursor, putative, expressed GO:0009653 anatomical structure morphogenesis P
LOC_Os10g39110.1 expansin precursor, putative, expressed GO:0016049 cell growth P
LOC_Os10g39110.1 expansin precursor, putative, expressed GO:0009987 cellular process P
LOC_Os10g39110.1 expansin precursor, putative, expressed GO:0005576 extracellular region C
LOC_Os10g39110.1 expansin precursor, putative, expressed GO:0030154 cell differentiation P
LOC_Os10g39110.1 expansin precursor, putative, expressed GO:0007275 multicellular organismal development P
LOC_Os10g39120.1 ubiquitin-conjugating enzyme, putative, expressed GO:0006464 protein modification process P
LOC_Os10g39120.1 ubiquitin-conjugating enzyme, putative, expressed GO:0005634 nucleus C
LOC_Os10g39120.1 ubiquitin-conjugating enzyme, putative, expressed GO:0005515 protein binding F
LOC_Os10g39120.1 ubiquitin-conjugating enzyme, putative, expressed GO:0000003 reproduction P
LOC_Os10g39120.1 ubiquitin-conjugating enzyme, putative, expressed GO:0009791 post-embryonic development P
LOC_Os10g39120.1 ubiquitin-conjugating enzyme, putative, expressed GO:0009790 embryo development P
LOC_Os10g39120.1 ubiquitin-conjugating enzyme, putative, expressed GO:0009719 response to endogenous stimulus P
LOC_Os10g39120.1 ubiquitin-conjugating enzyme, putative, expressed GO:0003824 catalytic activity F
-------------------------------------------------------------------------
Warnings/Errors:
LOC_Os04g46500.1 No Plant GOSlim ID has been assigned for LOC_Os04g46500.1
LOC_Os03g04010.1 No Plant GOSlim ID has been assigned for LOC_Os03g04010.1
LOC_Os05g20760.1 No Plant GOSlim ID has been assigned for LOC_Os05g20760.1
LOC_Os05g17580.1 No Plant GOSlim ID has been assigned for LOC_Os05g17580.1
LOC_Os05g16510.1 No Plant GOSlim ID has been assigned for LOC_Os05g16510.1
LOC_Os05g16450.1 No Plant GOSlim ID has been assigned for LOC_Os05g16450.1
LOC_Os05g16680.1 No Plant GOSlim ID has been assigned for LOC_Os05g16680.1
LOC_Os02g12970.1 No Plant GOSlim ID has been assigned for LOC_Os02g12970.1
LOC_Os03g02120.1 No Plant GOSlim ID has been assigned for LOC_Os03g02120.1
LOC_Os10g38664.1 No Plant GOSlim ID has been assigned for LOC_Os10g38664.1
LOC_Os05g17380.1 No Plant GOSlim ID has been assigned for LOC_Os05g17380.1
LOC_Os05g20770.1 No Plant GOSlim ID has been assigned for LOC_Os05g20770.1
LOC_Os03g03800.1 No Plant GOSlim ID has been assigned for LOC_Os03g03800.1
LOC_Os05g16500.1 No Plant GOSlim ID has been assigned for LOC_Os05g16500.1
LOC_Os10g39084.1 No Plant GOSlim ID has been assigned for LOC_Os10g39084.1
LOC_Os10g38790.1 No Plant GOSlim ID has been assigned for LOC_Os10g38790.1
LOC_Os10g38402.1 No Plant GOSlim ID has been assigned for LOC_Os10g38402.1
LOC_Os03g03110.1 No Plant GOSlim ID has been assigned for LOC_Os03g03110.1
LOC_Os03g03970.1 No Plant GOSlim ID has been assigned for LOC_Os03g03970.1
LOC_Os05g16400.1 No Plant GOSlim ID has been assigned for LOC_Os05g16400.1
LOC_Os05g20700.1 No Plant GOSlim ID has been assigned for LOC_Os05g20700.1
LOC_Os04g46520.1 No Plant GOSlim ID has been assigned for LOC_Os04g46520.1
LOC_Os10g39060.1 No Plant GOSlim ID has been assigned for LOC_Os10g39060.1
LOC_Os05g20560.1 No Plant GOSlim ID has been assigned for LOC_Os05g20560.1
LOC_Os03g02660.1 No Plant GOSlim ID has been assigned for LOC_Os03g02660.1
LOC_Os10g38370.1 No Plant GOSlim ID has been assigned for LOC_Os10g38370.1
LOC_Os02g12939.1 No Plant GOSlim ID has been assigned for LOC_Os02g12939.1
LOC_Os03g02060.1 No Plant GOSlim ID has been assigned for LOC_Os03g02060.1
LOC_Os03g02090.1 No Plant GOSlim ID has been assigned for LOC_Os03g02090.1
LOC_Os05g20470.1 No Plant GOSlim ID has been assigned for LOC_Os05g20470.1
LOC_Os05g20650.1 No Plant GOSlim ID has been assigned for LOC_Os05g20650.1
LOC_Os05g16540.1 No Plant GOSlim ID has been assigned for LOC_Os05g16540.1
LOC_Os03g01930.1 No Plant GOSlim ID has been assigned for LOC_Os03g01930.1
LOC_Os05g17570.1 No Plant GOSlim ID has been assigned for LOC_Os05g17570.1
LOC_Os04g46260.1 No Plant GOSlim ID has been assigned for LOC_Os04g46260.1
LOC_Os02g13210.1 No Plant GOSlim ID has been assigned for LOC_Os02g13210.1
LOC_Os05g16490.1 No Plant GOSlim ID has been assigned for LOC_Os05g16490.1
LOC_Os02g12930.1 No Plant GOSlim ID has been assigned for LOC_Os02g12930.1
LOC_Os05g16440.1 No Plant GOSlim ID has been assigned for LOC_Os05g16440.1
LOC_Os05g20690.1 No Plant GOSlim ID has been assigned for LOC_Os05g20690.1
LOC_Os05g17300.1 No Plant GOSlim ID has been assigned for LOC_Os05g17300.1
LOC_Os10g37960.1 No Plant GOSlim ID has been assigned for LOC_Os10g37960.1
LOC_Os10g37604.1 No Plant GOSlim ID has been assigned for LOC_Os10g37604.1
LOC_Os10g37899.1 No Plant GOSlim ID has been assigned for LOC_Os10g37899.1
LOC_Os05g17290.1 No Plant GOSlim ID has been assigned for LOC_Os05g17290.1
LOC_Os05g16790.1 No Plant GOSlim ID has been assigned for LOC_Os05g16790.1
LOC_Os05g16520.1 No Plant GOSlim ID has been assigned for LOC_Os05g16520.1
LOC_Os05g17320.1 No Plant GOSlim ID has been assigned for LOC_Os05g17320.1
LOC_Os05g16610.1 No Plant GOSlim ID has been assigned for LOC_Os05g16610.1
LOC_Os03g01950.1 No Plant GOSlim ID has been assigned for LOC_Os03g01950.1
LOC_Os05g17420.1 No Plant GOSlim ID has been assigned for LOC_Os05g17420.1
LOC_Os02g13080.1 No Plant GOSlim ID has been assigned for LOC_Os02g13080.1
LOC_Os10g37810.1 No Plant GOSlim ID has been assigned for LOC_Os10g37810.1
LOC_Os02g13010.1 No Plant GOSlim ID has been assigned for LOC_Os02g13010.1
LOC_Os05g17590.1 No Plant GOSlim ID has been assigned for LOC_Os05g17590.1
LOC_Os05g17490.1 No Plant GOSlim ID has been assigned for LOC_Os05g17490.1
LOC_Os02g13040.1 No Plant GOSlim ID has been assigned for LOC_Os02g13040.1
LOC_Os03g02650.1 No Plant GOSlim ID has been assigned for LOC_Os03g02650.1
LOC_Os05g20740.1 No Plant GOSlim ID has been assigned for LOC_Os05g20740.1
LOC_Os05g20660.1 No Plant GOSlim ID has been assigned for LOC_Os05g20660.1
LOC_Os05g17390.1 No Plant GOSlim ID has been assigned for LOC_Os05g17390.1
LOC_Os10g37990.1 No Plant GOSlim ID has been assigned for LOC_Os10g37990.1
LOC_Os06g01280.1 No Plant GOSlim ID has been assigned for LOC_Os06g01280.1
LOC_Os10g37800.1 No Plant GOSlim ID has been assigned for LOC_Os10g37800.1
LOC_Os05g16395.1 No Plant GOSlim ID has been assigned for LOC_Os05g16395.1
LOC_Os05g17400.1 No Plant GOSlim ID has been assigned for LOC_Os05g17400.1
LOC_Os05g17310.1 No Plant GOSlim ID has been assigned for LOC_Os05g17310.1
LOC_Os05g20680.1 No Plant GOSlim ID has been assigned for LOC_Os05g20680.1
LOC_Os03g02544.1 No Plant GOSlim ID has been assigned for LOC_Os03g02544.1
LOC_Os05g20710.1 No Plant GOSlim ID has been assigned for LOC_Os05g20710.1
LOC_Os05g16690.1 No Plant GOSlim ID has been assigned for LOC_Os05g16690.1
LOC_Os10g37350.1 No Plant GOSlim ID has been assigned for LOC_Os10g37350.1
LOC_Os02g12980.1 No Plant GOSlim ID has been assigned for LOC_Os02g12980.1
LOC_Os10g37370.1 No Plant GOSlim ID has been assigned for LOC_Os10g37370.1
LOC_Os04g46639.1 No Plant GOSlim ID has been assigned for LOC_Os04g46639.1
LOC_Os05g17450.1 No Plant GOSlim ID has been assigned for LOC_Os05g17450.1
LOC_Os03g02470.1 No Plant GOSlim ID has been assigned for LOC_Os03g02470.1
LOC_Os05g17410.1 No Plant GOSlim ID has been assigned for LOC_Os05g17410.1
LOC_Os03g04150.1 No Plant GOSlim ID has been assigned for LOC_Os03g04150.1
LOC_Os10g37580.1 No Plant GOSlim ID has been assigned for LOC_Os10g37580.1
LOC_Os05g20620.2 No Plant GOSlim ID has been assigned for LOC_Os05g20620.2
LOC_Os10g37780.1 No Plant GOSlim ID has been assigned for LOC_Os10g37780.1
LOC_Os10g37590.1 No Plant GOSlim ID has been assigned for LOC_Os10g37590.1
LOC_Os05g17440.1 No Plant GOSlim ID has been assigned for LOC_Os05g17440.1
LOC_Os10g37510.1 No Plant GOSlim ID has been assigned for LOC_Os10g37510.1
LOC_Os02g15790.1 No Plant GOSlim ID has been assigned for LOC_Os02g15790.1
LOC_Os04g46420.1 No Plant GOSlim ID has been assigned for LOC_Os04g46420.1
LOC_Os05g20590.1 No Plant GOSlim ID has been assigned for LOC_Os05g20590.1
LOC_Os05g17510.1 No Plant GOSlim ID has been assigned for LOC_Os05g17510.1
LOC_Os02g13000.1 No Plant GOSlim ID has been assigned for LOC_Os02g13000.1
LOC_Os10g39080.1 No Plant GOSlim ID has been assigned for LOC_Os10g39080.1
LOC_Os10g39070.1 No Plant GOSlim ID has been assigned for LOC_Os10g39070.1
LOC_Os10g37970.1 No Plant GOSlim ID has been assigned for LOC_Os10g37970.1
LOC_Os05g17540.1 No Plant GOSlim ID has been assigned for LOC_Os05g17540.1
LOC_Os03g03080.1 No Plant GOSlim ID has been assigned for LOC_Os03g03080.1
LOC_Os10g37440.1 No Plant GOSlim ID has been assigned for LOC_Os10g37440.1
LOC_Os06g01430.1 No Plant GOSlim ID has been assigned for LOC_Os06g01430.1
LOC_Os05g20600.1 No Plant GOSlim ID has been assigned for LOC_Os05g20600.1
LOC_Os10g38570.1 No Plant GOSlim ID has been assigned for LOC_Os10g38570.1
LOC_Os06g01450.1 No Plant GOSlim ID has been assigned for LOC_Os06g01450.1
LOC_Os03g02210.1 No Plant GOSlim ID has been assigned for LOC_Os03g02210.1
LOC_Os03g02255.1 No Plant GOSlim ID has been assigned for LOC_Os03g02255.1
LOC_Os06g01270.1 No Plant GOSlim ID has been assigned for LOC_Os06g01270.1
LOC_Os05g20640.1 No Plant GOSlim ID has been assigned for LOC_Os05g20640.1
LOC_Os05g17330.1 No Plant GOSlim ID has been assigned for LOC_Os05g17330.1
LOC_Os03g02340.1 No Plant GOSlim ID has been assigned for LOC_Os03g02340.1
LOC_Os02g15830.1 No Plant GOSlim ID has been assigned for LOC_Os02g15830.1
LOC_Os05g16664.1 No Plant GOSlim ID has been assigned for LOC_Os05g16664.1
LOC_Os06g01420.1 No Plant GOSlim ID has been assigned for LOC_Os06g01420.1
LOC_Os04g46540.1 No Plant GOSlim ID has been assigned for LOC_Os04g46540.1
LOC_Os02g13190.1 No Plant GOSlim ID has been assigned for LOC_Os02g13190.1
LOC_Os05g17560.1 No Plant GOSlim ID has been assigned for LOC_Os05g17560.1
LOC_Os03g02130.1 No Plant GOSlim ID has been assigned for LOC_Os03g02130.1
LOC_Os03g01940.1 No Plant GOSlim ID has been assigned for LOC_Os03g01940.1
LOC_Os05g17430.1 No Plant GOSlim ID has been assigned for LOC_Os05g17430.1
LOC_Os05g17520.1 No Plant GOSlim ID has been assigned for LOC_Os05g17520.1
LOC_Os10g38560.1 No Plant GOSlim ID has been assigned for LOC_Os10g38560.1
LOC_Os10g38460.1 No Plant GOSlim ID has been assigned for LOC_Os10g38460.1
LOC_Os05g20630.1 No Plant GOSlim ID has been assigned for LOC_Os05g20630.1
LOC_Os04g46510.1 No Plant GOSlim ID has been assigned for LOC_Os04g46510.1
LOC_Os02g15800.1 No Plant GOSlim ID has been assigned for LOC_Os02g15800.1
LOC_Os10g37950.1 No Plant GOSlim ID has been assigned for LOC_Os10g37950.1
LOC_Os10g38760.1 No Plant GOSlim ID has been assigned for LOC_Os10g38760.1
LOC_Os10g38680.1 No Plant GOSlim ID has been assigned for LOC_Os10g38680.1
LOC_Os03g02630.1 No Plant GOSlim ID has been assigned for LOC_Os03g02630.1
LOC_Os05g16720.1 No Plant GOSlim ID has been assigned for LOC_Os05g16720.1
LOC_Os05g20730.1 No Plant GOSlim ID has been assigned for LOC_Os05g20730.1
LOC_Os05g20670.1 No Plant GOSlim ID has been assigned for LOC_Os05g20670.1
LOC_Os03g02370.1 No Plant GOSlim ID has been assigned for LOC_Os03g02370.1
LOC_Os10g38510.1 No Plant GOSlim ID has been assigned for LOC_Os10g38510.1
LOC_Os10g38520.1 No Plant GOSlim ID has been assigned for LOC_Os10g38520.1
LOC_Os10g38954.1 No Plant GOSlim ID has been assigned for LOC_Os10g38954.1
LOC_Os03g03010.1 No Plant GOSlim ID has been assigned for LOC_Os03g03010.1
LOC_Os10g37870.1 No Plant GOSlim ID has been assigned for LOC_Os10g37870.1
LOC_Os10g37468.1 No Plant GOSlim ID has been assigned for LOC_Os10g37468.1
LOC_Os05g20530.1 No Plant GOSlim ID has been assigned for LOC_Os05g20530.1
LOC_Os05g16550.1 No Plant GOSlim ID has been assigned for LOC_Os05g16550.1
LOC_Os05g20610.1 No Plant GOSlim ID has been assigned for LOC_Os05g20610.1
LOC_Os05g16770.1 No Plant GOSlim ID has been assigned for LOC_Os05g16770.1
LOC_Os05g17350.1 No Plant GOSlim ID has been assigned for LOC_Os05g17350.1
LOC_Os03g02360.1 No Plant GOSlim ID has been assigned for LOC_Os03g02360.1
LOC_Os05g16590.1 No Plant GOSlim ID has been assigned for LOC_Os05g16590.1
LOC_Os02g13120.1 No Plant GOSlim ID has been assigned for LOC_Os02g13120.1
LOC_Os05g16470.1 No Plant GOSlim ID has been assigned for LOC_Os05g16470.1
LOC_Os02g13070.1 No Plant GOSlim ID has been assigned for LOC_Os02g13070.1
LOC_Os05g16530.1 No Plant GOSlim ID has been assigned for LOC_Os05g16530.1
LOC_Os04g46360.1 No Plant GOSlim ID has been assigned for LOC_Os04g46360.1
LOC_Os10g38550.1 No Plant GOSlim ID has been assigned for LOC_Os10g38550.1
LOC_Os10g37620.1 No Plant GOSlim ID has been assigned for LOC_Os10g37620.1
LOC_Os05g17280.1 No Plant GOSlim ID has been assigned for LOC_Os05g17280.1
LOC_Os10g38070.1 No Plant GOSlim ID has been assigned for LOC_Os10g38070.1
LOC_Os05g16410.1 No Plant GOSlim ID has been assigned for LOC_Os05g16410.1
LOC_Os10g37560.1 No Plant GOSlim ID has been assigned for LOC_Os10g37560.1
LOC_Os05g16760.1 No Plant GOSlim ID has been assigned for LOC_Os05g16760.1
LOC_Os05g17370.1 No Plant GOSlim ID has been assigned for LOC_Os05g17370.1
LOC_Os04g46430.1 No Plant GOSlim ID has been assigned for LOC_Os04g46430.1
LOC_Os05g17470.1 No Plant GOSlim ID has been assigned for LOC_Os05g17470.1
LOC_Os10g37540.1 No Plant GOSlim ID has been assigned for LOC_Os10g37540.1
LOC_Os05g20520.1 No Plant GOSlim ID has been assigned for LOC_Os05g20520.1
LOC_Os04g46444.1 No Plant GOSlim ID has been assigned for LOC_Os04g46444.1
LOC_Os05g16460.1 No Plant GOSlim ID has been assigned for LOC_Os05g16460.1
LOC_Os02g12990.1 No Plant GOSlim ID has been assigned for LOC_Os02g12990.1
LOC_Os05g16600.1 No Plant GOSlim ID has been assigned for LOC_Os05g16600.1
LOC_Os10g38420.1 No Plant GOSlim ID has been assigned for LOC_Os10g38420.1
LOC_Os03g02140.1 No Plant GOSlim ID has been assigned for LOC_Os03g02140.1
LOC_Os05g17460.1 No Plant GOSlim ID has been assigned for LOC_Os05g17460.1
LOC_Os05g20750.1 No Plant GOSlim ID has been assigned for LOC_Os05g20750.1
LOC_Os03g03060.1 No Plant GOSlim ID has been assigned for LOC_Os03g03060.1
LOC_Os05g16700.1 No Plant GOSlim ID has been assigned for LOC_Os05g16700.1
LOC_Os10g39044.1 No Plant GOSlim ID has been assigned for LOC_Os10g39044.1
LOC_Os02g12950.1 No Plant GOSlim ID has been assigned for LOC_Os02g12950.1
LOC_Os05g16570.1 No Plant GOSlim ID has been assigned for LOC_Os05g16570.1
LOC_Os10g38386.1 No Plant GOSlim ID has been assigned for LOC_Os10g38386.1
LOC_Os04g46210.1 No Plant GOSlim ID has been assigned for LOC_Os04g46210.1
LOC_Os05g16620.1 No Plant GOSlim ID has been assigned for LOC_Os05g16620.1
LOC_Os05g16710.1 No Plant GOSlim ID has been assigned for LOC_Os05g16710.1
LOC_Os05g17500.1 No Plant GOSlim ID has been assigned for LOC_Os05g17500.1
LOC_Os04g46550.1 No Plant GOSlim ID has been assigned for LOC_Os04g46550.1
LOC_Os05g20500.1 No Plant GOSlim ID has been assigned for LOC_Os05g20500.1
LOC_Os03g02350.1 No Plant GOSlim ID has been assigned for LOC_Os03g02350.1
LOC_Os10g37680.1 No Plant GOSlim ID has been assigned for LOC_Os10g37680.1
LOC_Os04g46530.1 No Plant GOSlim ID has been assigned for LOC_Os04g46530.1
LOC_Os05g20540.1 No Plant GOSlim ID has been assigned for LOC_Os05g20540.1
LOC_Os02g12860.1 No Plant GOSlim ID has been assigned for LOC_Os02g12860.1
LOC_Os03g02230.1 No Plant GOSlim ID has been assigned for LOC_Os03g02230.1
LOC_Os02g12960.1 No Plant GOSlim ID has been assigned for LOC_Os02g12960.1
LOC_Os05g17530.1 No Plant GOSlim ID has been assigned for LOC_Os05g17530.1
LOC_Os05g17360.1 No Plant GOSlim ID has been assigned for LOC_Os05g17360.1
LOC_Os10g38440.1 No Plant GOSlim ID has been assigned for LOC_Os10g38440.1
LOC_Os10g38170.1 No Plant GOSlim ID has been assigned for LOC_Os10g38170.1
LOC_Os03g02500.1 No Plant GOSlim ID has been assigned for LOC_Os03g02500.1
LOC_Os05g16480.1 No Plant GOSlim ID has been assigned for LOC_Os05g16480.1
LOC_Os10g37459.1 No Plant GOSlim ID has been assigned for LOC_Os10g37459.1
LOC_Os03g02620.1 No Plant GOSlim ID has been assigned for LOC_Os03g02620.1
LOC_Os10g38890.1 No Plant GOSlim ID has been assigned for LOC_Os10g38890.1
LOC_Os02g13090.1 No Plant GOSlim ID has been assigned for LOC_Os02g13090.1
LOC_Os10g38130.1 No Plant GOSlim ID has been assigned for LOC_Os10g38130.1
LOC_Os10g37450.1 No Plant GOSlim ID has been assigned for LOC_Os10g37450.1
LOC_Os03g01915.1 No Plant GOSlim ID has been assigned for LOC_Os03g01915.1
LOC_Os02g12840.1 No Plant GOSlim ID has been assigned for LOC_Os02g12840.1
LOC_Os05g16580.1 No Plant GOSlim ID has been assigned for LOC_Os05g16580.1
LOC_Os05g16800.1 No Plant GOSlim ID has been assigned for LOC_Os05g16800.1
LOC_Os05g17550.1 No Plant GOSlim ID has been assigned for LOC_Os05g17550.1
LOC_Os03g03050.1 No Plant GOSlim ID has been assigned for LOC_Os03g03050.1
LOC_Os05g20480.1 No Plant GOSlim ID has been assigned for LOC_Os05g20480.1
LOC_Os05g17340.1 No Plant GOSlim ID has been assigned for LOC_Os05g17340.1
LOC_Os04g46380.1 No Plant GOSlim ID has been assigned for LOC_Os04g46380.1
LOC_Os05g16780.1 No Plant GOSlim ID has been assigned for LOC_Os05g16780.1
LOC_Os10g37570.1 No Plant GOSlim ID has been assigned for LOC_Os10g37570.1
LOC_Os05g20720.1 No Plant GOSlim ID has been assigned for LOC_Os05g20720.1
LOC_Os03g02080.1 No Plant GOSlim ID has been assigned for LOC_Os03g02080.1
LOC_Os10g37860.1 No Plant GOSlim ID has been assigned for LOC_Os10g37860.1
LOC_Os02g13030.1 No Plant GOSlim ID has been assigned for LOC_Os02g13030.1
LOC_Os05g20510.1 No Plant GOSlim ID has been assigned for LOC_Os05g20510.1
LOC_Os03g03840.1 No Plant GOSlim ID has been assigned for LOC_Os03g03840.1
LOC_Os05g16750.1 No Plant GOSlim ID has been assigned for LOC_Os05g16750.1
LOC_Os10g37940.1 No Plant GOSlim ID has been assigned for LOC_Os10g37940.1
LOC_Os05g20490.1 No Plant GOSlim ID has been assigned for LOC_Os05g20490.1
LOC_Os03g03120.1 No Plant GOSlim ID has been assigned for LOC_Os03g03120.1
LOC_Os05g16560.1 No Plant GOSlim ID has been assigned for LOC_Os05g16560.1
LOC_Os10g38750.1 No Plant GOSlim ID has been assigned for LOC_Os10g38750.1
LOC_Os10g38196.1 No Plant GOSlim ID has been assigned for LOC_Os10g38196.1
LOC_Os10g37610.1 No Plant GOSlim ID has been assigned for LOC_Os10g37610.1
LOC_Os10g39000.1 No Plant GOSlim ID has been assigned for LOC_Os10g39000.1
LOC_Os10g37820.1 No Plant GOSlim ID has been assigned for LOC_Os10g37820.1
LOC_Os05g20550.1 No Plant GOSlim ID has been assigned for LOC_Os05g20550.1
