# Supplementary material for: Natural Variation OsCd1<sup>V449</sup> Contributes to Reducing Cadmium Accumulation in Rice Grain
Source: Preprints.org preprint supplement (doi:10.20944/preprints201802.0075.v1), 2018-02-09
Supplement: Supplementary file 6 [file Table S5.xlsx]

## Sheet: TableS4
Supplementary Table 5. The members of Major Facilitator Superfamily (MFS) in rice
Protein	Possible substrate
LOC_Os03g02380	unkonwn
LOC_Os03g59450	unkonwn
LOC_Os07g09010	unkonwn
LOC_Os07g10820	unkonwn
LOC_Os07g38400	unkonwn
LOC_Os08g31670	unkonwn
LOC_Os08g31710	unkonwn
LOC_Os09g20480	unkonwn
LOC_Os09g20490	unkonwn
LOC_Os09g20500	unkonwn
LOC_Os09g20510	unkonwn
LOC_Os09g20520	unkonwn
LOC_Os10g37520	unkonwn
LOC_Os11g05390	unkonwn
LOC_Os02g44730	tetracycline
LOC_Os07g08310	tetracycline
LOC_Os11g04020	tetracycline
LOC_Os11g04030	tetracycline
LOC_Os11g04060	tetracycline
LOC_Os11g04150	tetracycline
LOC_Os09g38690	sugar
LOC_Os01g16260	sugar
LOC_Os01g17214	sugar
LOC_Os01g63290	sugar
LOC_Os03g60820	sugar
LOC_Os04g51970	sugar
LOC_Os05g37820	sugar
LOC_Os05g49260	sugar
LOC_Os05g49270	sugar
LOC_Os05g50280	sugar
LOC_Os10g42830	sugar
LOC_Os11g42430	sugar
LOC_Os04g44430	sugar
LOC_Os01g73590	sorbitol
LOC_Os03g10090	sorbitol
LOC_Os03g10100	sorbitol
LOC_Os04g44750	sorbitol
LOC_Os04g58220	sorbitol
LOC_Os04g58230	sorbitol
LOC_Os07g39350	sorbitol
LOC_Os07g39360	sorbitol
LOC_Os07g39400	sorbitol
LOC_Os11g41840	sorbitol
LOC_Os11g41850	sorbitol
LOC_Os11g41870	sorbitol
LOC_Os12g32760	sorbitol
LOC_Os12g32940	sorbitol
LOC_Os10g21590	sorbitol/mannitol
LOC_Os01g17240	phosphate
LOC_Os01g46860	phosphate
LOC_Os02g39750	phosphate
LOC_Os03g04360	phosphate
LOC_Os03g05610	phosphate
LOC_Os03g05620	phosphate
LOC_Os03g05640	phosphate
LOC_Os04g10690	phosphate
LOC_Os04g10750	phosphate
LOC_Os04g10800	phosphate
LOC_Os06g21950	phosphate
LOC_Os08g45000	phosphate
LOC_Os09g38410	phosphate
LOC_Os09g39680	phosphate
LOC_Os10g30770	phosphate
LOC_Os10g30790	phosphate
LOC_Os11g08370	phosphate
LOC_Os12g07970	phosphate
LOC_Os06g21930	phosphate (split)
LOC_Os01g10240	organic cation
LOC_Os01g22710	organic cation
LOC_Os04g53930	organic cation
LOC_Os07g37454	organic cation
LOC_Os07g37510	organic cation
LOC_Os07g37530	organic cation
LOC_Os08g42010	nodulin-like protein
LOC_Os09g36600	nodulin-like protein
LOC_Os03g47810	nodule-specific protein
LOC_Os03g58580	nodule-specific protein
LOC_Os04g31924	nodule-specific protein
LOC_Os04g42420	nodule-specific protein
LOC_Os06g08110	nodule-specific protein
LOC_Os08g15450	nodule-specific protein
LOC_Os10g08850	nodule-specific protein
LOC_Os12g29950	nodule-specific protein
LOC_Os12g44060	nodule-specific protein
LOC_Os12g44070	nodule-specific protein
LOC_Os12g44180	nodule-specific protein
LOC_Os01g36720	nitrate
LOC_Os01g50820	nitrate
LOC_Os02g02170	nitrate
LOC_Os02g02190	nitrate
LOC_Os04g41460	myo-inositol
LOC_Os04g43210	myo-inositol
LOC_Os07g05640	myo-inositol
LOC_Os11g04104	multidrug efflux
LOC_Os12g03830	multidrug efflux
LOC_Os12g03860	multidrug efflux
LOC_Os12g03870	multidrug efflux
LOC_Os12g03950	multidrug efflux
LOC_Os12g03899	multidrug efflux
LOC_Os01g38670	monosaccharide
LOC_Os01g38680	monosaccharide
LOC_Os02g06540	monosaccharide
LOC_Os04g53930	monosaccharide
LOC_Os07g01560	monosaccharide
LOC_Os07g37320	monosaccharide
LOC_Os08g08070	monosaccharide
LOC_Os09g12590	monosaccharide
LOC_Os09g15330	monosaccharide
LOC_Os12g04640	monosaccharide
LOC_Os01g04190	hexose
LOC_Os02g13560	hexose
LOC_Os02g17500	hexose
LOC_Os02g36414	hexose
LOC_Os02g36440	hexose
LOC_Os02g36450	hexose
LOC_Os02g36490	hexose
LOC_Os02g58530	hexose
LOC_Os03g01170	hexose
LOC_Os03g03680	hexose
LOC_Os03g11900	hexose
LOC_Os03g24860	hexose
LOC_Os03g24870	hexose
LOC_Os03g39710	hexose
LOC_Os04g37970	hexose
LOC_Os04g37980	hexose
LOC_Os04g37990	hexose
LOC_Os04g38010	hexose
LOC_Os04g38026	hexose
LOC_Os04g38220	hexose
LOC_Os06g04900	hexose
LOC_Os07g03910	hexose
LOC_Os07g03960	hexose
LOC_Os07g10590	hexose
LOC_Os09g09520	hexose
LOC_Os09g23110	hexose
LOC_Os09g24924	hexose
LOC_Os09g27900	hexose
LOC_Os10g13440	hexose
LOC_Os10g39440	hexose
LOC_Os10g40950	hexose
LOC_Os10g41190	hexose
LOC_Os11g28610	hexose
LOC_Os11g38160	hexose
LOC_Os11g40540	hexose
LOC_Os03g43720	hexose
LOC_Os02g43620	glycerol-3-phosphate
LOC_Os04g46880	glycerol-3-phosphate
LOC_Os06g08170	glycerol 3-phosphate
LOC_Os08g06010	glycerol-3-phosphate
