# Supplementary material for: Natural Variation OsCd1<sup>V449</sup> Contributes to Reducing Cadmium Accumulation in Rice Grain
Source: Preprints.org preprint supplement (doi:10.20944/preprints201802.0075.v1), 2018-02-09
Supplement: Supplementary file 7 [file Table S6.xlsx]

## Sheet: 工作表1
Supplementary Table 6. OsCd1 sequence variation in 127 rice cultivars
Position	Alleles	cDNA position		Protein position		Amino acids		Consequences
3:846037	T/A	1547		449		V/D		Missense variant
	5' UTR				Exon 3															Exon 4	Intron 6	Intron 7		3' UTR
Position	3:842392	3:842588	3:842611	3:842747	3:843460	3:843473	3:843530	3:843573	3:843636	3:843644	3:844102	3:844135	3:844179	3:844268	3:844273	3:844280	3:844309	3:844328	3:844332	3:845157	3:845563	3:846037	3:846050	3:846320
CH1305	AA	AA	AA	TT	TT	GG	CC	GG	GG	GG	AA	GG	CC	GG	CC	AA	CC	TT	TT	TT	GG	TT	GG	TT
CX181	AA	AA	AA	TT	TT	GG	CC	GG	GG	GG	AA	GG	CC	GG	CC	AA	CC	TT	TT	TT	GG	TT	GG	TT
CX198	TT	TT	AA	CT	CC	AA	TT	AA	AA	AA	GG	AA	CC	AA	CC	CC	CC	TT	AA	AA	GG	AA	AA	TT
CX333	TT	AA	GG	CC	CC	GG	CC	GG	GG	GG	GG	GG	TT	GG	TT	CC	GG	GG	AA	TT	TT	TT	GG	TT
CH1003	AA	AA	AA	TT	TT	GG	CC	GG	GG	GG	AA	GG	CC	GG	CC	AA	CC	TT	TT	TT	GG	TT	GG	TT
CH1005	TT	AA	GG	CC	CC	GG	CC	GG	GG	GG	GG	GG	CT	GG	TT	AC	CG	GG	AT	TT	TT	TT	GG	TT
CH1015	TT	TT	AA	CT	CC	AA	TT	AA	AA	AA	GG	GG	CC	AA	CC	CC	CC	TT	AA	AA	GG	AA	AA	TT
CH1017	TT	TT	AA	CT	CC	AA	TT	AA	AA	AA	GG	GG	CC	AA	CC	CC	CC	TT	AA	AA	GG	AA	AA	TT
CH1021	TT	AT	GG	CT	CC	AG	CC	GG	AG	AG	GG	GG	TT	AG	CT	CC	CG	GT	AA	TT	TT	AT	GG	TT
CH1027	TT	AA	GG	CC	CC	GG	CC	GG	GG	GG	GG	GG	TT	GG	TT	CC	GG	GG	AA	TT	TT	TT	GG	TT
CH1029	TT	AA	GG	CC	CC	GG	CC	GG	GG	GG	GG	GG	TT	GG	TT	CC	GG	GG	AA	AT	TT	TT	GG	TT
CH1034	TT	TT	AA	CT	CT	AG	TT	AA	AG	AA	GG	GG	CC	AA	CC	CC	CC	TT	AA	AA	GG	AA	AG	TT
CH1035	TT	AA	AG	CT	CC	GG	CC	GG	GG	GG	GG	GG	TT	GG	TT	CC	GG	GG	AA	TT	TT	TT	GG	TT
CH1044	TT	AT	AG	CC	CC	AA	TT	AA	GG	AA	GG	GG	CC	AA	CC	CC	CG	GT	AA	AA	GT	AA	AG	TT
CH1054	TT	AA	AG	CT	CT	GG	CC	GG	GG	GG	GG	GG	TT	GG	CT	AC	CG	GG	AA	TT	TT	TT	GG	TT
CH1060	TT	AA	AG	CC	CC	AG	CT	GG	GG	GG	GG	GG	TT	AA	CT	CC	CG	GT	AA	TT	TT	TT	AG	TT
CH1062	TT	TT	AA	CT	CC	AG	TT	AG	GG	AG	AG	GG	CC	AG	CC	AC	CC	TT	AA	AT	GG	AT	AG	TT
CH1063	TT	TT	AA	CT	CC	AA	TT	AA	AA	AA	GG	GG	CC	AA	CC	CC	CC	TT	AA	AA	GG	AA	AA	GG
CH1082	TT	TT	AA	CT	CC	AA	TT	AA	AA	AA	GG	GG	CC	AA	CC	CC	CC	TT	AA	AA	GG	AA	AA	TT
CH1100	TT	TT	AA	CT	CC	AA	TT	AA	AA	AA	GG	GG	CC	AA	CC	CC	CC	TT	AA	AA	GG	AA	AA	GG
CH1101	TT	TT	AA	CT	CC	AA	TT	AA	AG	AG	GG	GG	CC	AA	CC	CC	CC	TT	AA	AA	GG	AA	AA	TT
CH1102	TT	TT	AA	CT	CC	AA	TT	AA	AA	AA	GG	GG	CC	AA	CC	CC	CC	TT	AA	AA	GG	AA	AA	TT
CH1104	TT	TT	AA	CT	CC	AA	TT	AA	AA	AA	GG	AA	CC	AA	CC	CC	CC	TT	AA	AA	GG	AA	AA	TT
CH1109	TT	TT	AA	CT	CC	AG	TT	AG	AA	AA	GG	GG	CC	AA	CC	CC	CC	TT	AA	AA	GG	AA	AA	TT
CH1110	TT	TT	AA	CT	CC	AA	TT	AA	AA	AA	GG	GG	CC	AA	CC	CC	CC	TT	AA	AA	GG	AA	AA	TT
CH1118	AA	AA	GG	CC	CC	GG	CC	GG	GG	GG	GG	GG	TT	GG	TT	CC	GG	GG	AA	TT	TT	TT	GG	TT
CH1119	TT	AA	GG	CC	CC	GG	CC	GG	GG	GG	GG	GG	TT	GG	TT	CC	GG	GG	AA	TT	TT	TT	GG	TT
CH1126	AT	TT	AA	CT	CC	AA	NN	NN	AA	AG	GG	AG	CC	AA	CC	CC	CC	GT	AA	AT	GT	AT	AG	TT
CH1131	TT	TT	AA	CT	CC	AA	TT	AA	AA	AA	GG	GG	CC	AA	CC	CC	CC	TT	AT	AA	GG	AA	AA	TT
CH1132	TT	TT	AA	CT	CC	AA	TT	AA	AA	AA	GG	GG	CC	AA	CC	CC	CC	TT	AA	AA	GG	AA	AA	TT
CH1141	TT	TT	AA	CT	CC	AA	TT	AA	AA	AA	GG	GG	CC	AA	CC	CC	CC	TT	AA	AA	GG	AA	AA	TT
CH1148	TT	TT	AA	CT	CC	AA	TT	AA	AA	AA	GG	AA	CC	AA	CC	CC	CC	TT	AA	AA	GG	AA	AA	TT
CH1149	TT	TT	AA	CT	CC	AA	TT	AA	AA	AA	GG	AG	CC	AA	CC	CC	CC	TT	AA	AA	GG	AA	AA	TT
CH1150	TT	TT	AA	CT	CC	AA	TT	AA	AA	AA	GG	GG	CC	AA	CC	CC	CC	TT	AA	AA	GG	AA	AA	GG
CH1155	TT	TT	AA	CT	CC	AA	TT	NN	AG	NN	GG	GG	CC	AA	CC	CC	CC	TT	AA	AA	GG	AA	AG	TT
CH1158	TT	TT	AA	CT	CC	AA	NN	AA	AA	AA	GG	GG	CC	AA	CC	CC	CC	TT	AA	AA	GG	AA	AA	TT
CH1159	TT	AT	AA	CT	CC	AA	TT	AA	AA	AA	GG	GG	CC	AG	CC	CC	CC	TT	AT	AA	GG	AA	AA	GG
CH1164	TT	TT	AA	CT	CC	AA	TT	AA	AA	AA	GG	GG	CC	AA	CC	CC	CC	TT	AA	AA	GG	AA	AA	TT
CH1166	TT	TT	AA	CT	CC	AA	TT	AA	AA	AA	GG	GG	CC	AA	CC	CC	CC	TT	AA	AA	GG	AA	AA	GT
CH1167	TT	TT	AA	CT	CC	AA	TT	AA	AA	AA	GG	GG	CC	AA	CC	CC	CC	TT	AA	AA	GG	AA	AA	TT
CH1183	TT	AA	GG	CC	CC	GG	CC	GG	GG	GG	AG	GG	TT	GG	CT	CC	GG	GG	AA	TT	GT	TT	GG	TT
CH1184	AA	AA	AA	TT	TT	GG	CC	GG	GG	GG	AA	GG	CC	GG	CC	AA	CC	TT	TT	TT	GG	TT	GG	TT
CH1186	TT	TT	AA	CT	CC	AA	TT	NN	AA	AA	GG	AA	CC	AA	CC	CC	CC	TT	AA	AA	GG	AA	AA	TT
CH1194	TT	TT	AA	CT	CC	AA	TT	AA	AA	AA	GG	GG	CC	AA	CC	CC	CC	TT	AA	AA	GG	AA	AA	TT
CH1196	TT	AA	GG	CC	CC	GG	CC	GG	GG	GG	GG	GG	TT	GG	TT	CC	GG	GG	AA	TT	TT	TT	GG	TT
CH1204	TT	TT	AA	CT	CC	AA	TT	NN	AA	AA	GG	GG	CC	AA	CC	CC	CC	TT	AA	AA	GG	AA	AA	TT
CH1209	TT	TT	AA	CT	CC	AA	TT	AA	AA	AA	GG	GG	CC	AA	CC	CC	CC	TT	AA	AA	GG	AA	AA	GG
CH1210	TT	TT	AA	CT	CC	AA	TT	AA	AG	AA	GG	GG	CC	AA	CC	CC	CC	TT	AA	AA	GG	AA	AA	TT
CH1219	TT	TT	AA	CT	CC	AA	TT	AA	AA	AA	GG	GG	CC	AA	CC	CC	CC	TT	AA	AA	GG	AA	AA	TT
CH1223	TT	AA	GG	CC	CC	GG	CC	GG	GG	GG	GG	GG	TT	GG	TT	CC	GG	GG	AA	TT	TT	TT	GG	TT
CH1227	TT	TT	AA	CC	CC	AA	TT	AA	GG	AA	GG	GG	CC	AA	CC	CC	CC	TT	AA	AA	GG	AA	AA	TT
CH1230	TT	AA	GG	CC	CC	GG	CC	GG	GG	GG	GG	GG	TT	GG	TT	CC	GG	GG	AA	TT	TT	TT	GG	TT
CH1232	TT	TT	AA	CT	CC	AA	TT	AA	AA	AA	GG	AA	CC	AA	CC	CC	CC	TT	AA	AA	GG	AA	AA	TT
CH1234	TT	TT	AA	CT	CC	AG	TT	AA	AA	AA	GG	GG	CC	AA	CC	CC	CC	TT	AA	AA	GT	AA	AA	TT
CH1243	TT	TT	AA	CT	CC	AA	NN	NN	AA	AA	GG	GG	CC	AA	CC	CC	CC	TT	AA	AA	GG	AA	AA	TT
CH1245	TT	TT	AA	CT	CC	AA	TT	AA	AA	AA	GG	GG	CC	AA	CC	CC	CC	TT	AA	AA	GG	AA	AA	TT
CH1247	AA	AA	AA	TT	TT	GG	CC	NN	GG	GG	NN	GG	CC	GG	CC	AA	CC	TT	TT	TT	GG	TT	AG	TT
CH1248	TT	TT	AA	CT	CC	AA	TT	NN	AG	AG	GG	AA	CC	AA	CC	CC	CC	TT	AA	AA	GG	AA	AA	TT
CH1250	AA	NN	NN	TT	TT	GG	NN	NN	GG	GG	AA	GG	NN	GG	CC	AA	CC	TT	TT	TT	GG	TT	GG	TT
CH1251	TT	TT	AA	CT	CC	AA	NN	AA	AA	AA	AG	AA	CC	AA	CC	CC	CC	TT	AA	AA	GG	AA	AA	TT
CH1253	TT	TT	AA	CT	CC	AA	TT	AA	AA	AA	GG	AA	CC	AA	CC	CC	NN	TT	AA	AA	GG	AT	AA	TT
CH1255	TT	TT	AA	CT	CC	AG	NN	AG	AA	AA	GG	GG	CC	AG	CT	CC	CG	GT	AA	AA	GG	AA	AA	GG
CH1265	TT	TT	AA	CT	CC	AA	TT	NN	AA	AA	GG	GG	CC	AA	CC	CC	CC	TT	AA	AA	GG	AA	AA	TT
CH1274	AA	AA	AA	TT	CT	AG	CT	GG	AG	AG	AA	GG	CC	GG	CC	AA	CC	TT	TT	TT	GG	TT	GG	TT
CH1276	TT	TT	AA	CT	CC	AA	TT	AA	AA	AA	GG	GG	CC	AA	CC	CC	CC	TT	AA	AA	GG	AA	AA	TT
CH1277	TT	TT	AA	CT	CC	AA	TT	NN	AA	AA	GG	GG	CC	AA	CC	CC	CC	TT	AA	AA	GG	AA	AA	TT
CH1278	TT	TT	AA	CT	CC	AA	TT	NN	AA	AA	GG	GG	CC	AA	CC	CC	CC	TT	AA	AA	GG	AA	AA	GG
CH1284	TT	TT	AA	CT	CT	AG	CT	AA	AG	AG	GG	GG	CC	AA	CC	CC	CC	TT	AT	AA	GG	AA	AA	TT
CH1288	AA	AA	AA	TT	TT	GG	CC	GG	GG	GG	AA	GG	CC	GG	CC	AA	CC	TT	TT	TT	GG	TT	GG	TT
CH1289	AA	AA	AA	TT	TT	GG	CC	GG	GG	GG	AA	GG	CC	GG	CC	AA	CC	TT	TT	TT	GG	TT	GG	TT
CH1291	TT	AA	GG	CC	CC	GG	CC	GG	GG	GG	GG	GG	TT	GG	TT	CC	GG	GG	AA	TT	TT	TT	GG	TT
CH1002	AA	AA	AA	TT	TT	GG	CC	GG	GG	GG	AA	GG	CC	GG	CC	AA	CC	TT	TT	TT	GG	TT	GG	TT
CH1010	AA	AA	AA	TT	TT	GG	CC	NN	GG	GG	AA	GG	CC	GG	CC	AA	CC	TT	TT	TT	GG	TT	GG	TT
CH1026	AA	AA	AA	TT	TT	GG	NN	GG	GG	GG	AA	GG	CC	GG	CC	AA	CC	TT	TT	TT	GG	TT	GG	TT
CH1050	TT	TT	AA	CT	CC	AA	TT	NN	AA	AA	GG	GG	CC	AA	CC	CC	CC	TT	AA	AA	GG	AA	AA	TT
CH1057	TT	TT	AA	CT	CC	AA	TT	NN	NN	AA	GG	AA	CC	AA	CC	CC	CC	TT	AA	AA	GG	AA	AA	TT
CH1074	TT	TT	AA	CT	CC	AA	TT	AA	AA	AA	GG	GG	CC	AA	CC	CC	CC	TT	AA	AA	GG	AA	AA	TT
CH1083	TT	AA	GG	CC	CC	GG	CC	GG	GG	GG	GG	GG	TT	GG	TT	CC	GG	GG	AA	TT	TT	TT	GG	TT
CH1093	TT	TT	AA	CT	CC	AA	TT	AA	AA	AA	GG	GG	CC	AA	CC	CC	CC	TT	AA	AA	GG	AA	AA	TT
CH1095	TT	TT	AA	CT	CC	AA	TT	AA	AA	AA	GG	GG	CC	AA	CC	CC	CC	TT	AA	AA	GG	AA	AA	TT
CH1106	TT	TT	AA	CT	CC	AA	TT	AA	AA	AA	GG	GG	CC	AA	CC	CC	CC	TT	AA	AA	GG	AA	AA	TT
CH1107	TT	TT	AA	TT	CC	AA	TT	AA	AA	AA	GG	GG	CC	AA	CC	CC	CC	TT	AA	AA	GG	AA	AA	TT
CH1111	TT	TT	AA	CT	CC	AA	TT	AA	AA	AA	GG	GG	CC	AA	CC	CC	CC	TT	AA	AA	GG	AA	AA	TT
CH1112	TT	TT	AA	CT	CC	AA	TT	NN	NN	NN	GG	AA	NN	AA	CC	CC	CC	TT	AA	AA	GG	AA	AA	TT
CH1114	TT	TT	AA	CC	CC	AA	NN	NN	GG	AA	GG	GG	NN	AA	CC	CC	CC	TT	AA	AA	GG	AA	AA	TT
CH1115	NN	TT	AA	CT	CC	AA	TT	NN	AA	AA	NN	GG	CC	NN	NN	NN	NN	TT	AA	AA	GG	AA	AA	TT
CH1125	TT	AA	GG	CC	CT	GG	CC	GG	GG	GG	GG	GG	TT	GG	TT	CC	GG	GG	AA	TT	TT	TT	GG	TT
CH1130	TT	TT	AA	CT	CC	AA	NN	NN	AA	AA	GG	GG	NN	AA	CC	CC	CC	TT	AA	AA	GG	AA	AA	TT
CH1146	TT	TT	AA	CT	CC	AA	TT	NN	AA	AA	GG	NN	CC	AA	CC	CC	CC	TT	AA	AT	GT	AA	AA	TT
CH1147	TT	TT	AA	CT	CC	AA	TT	AA	AA	AA	GG	AG	CC	AA	CC	CC	CC	TT	AA	AA	GG	AA	AA	TT
CH1156	TT	TT	AA	CT	CC	AA	TT	AA	AA	AA	GG	AA	CC	AA	CC	CC	CC	TT	AA	AA	GG	AA	AA	TT
CH1168	TT	TT	AA	CT	CC	AA	TT	AA	AA	AA	GG	GG	CC	AA	CC	CC	CC	TT	AA	AA	GG	AA	AA	TT
CH1171	TT	TT	AA	CT	CC	AA	TT	AA	AA	AA	GG	GG	CC	AA	CC	CC	CC	TT	AA	AA	GG	AA	AA	GT
CH1173	TT	TT	AA	CT	CC	AA	NN	NN	AA	AA	GG	GG	CC	AA	CC	CC	CC	TT	AA	AA	GG	AA	AA	TT
CH1180	AA	AA	AA	TT	TT	GG	CC	GG	GG	GG	AA	GG	CC	GG	CC	AA	CC	TT	TT	TT	GG	AT	AG	TT
CH1187	AA	AA	AA	TT	TT	GG	CC	GG	GG	GG	AA	GG	CC	GG	CC	AA	CC	TT	TT	TT	GG	TT	GG	TT
CH1195	TT	AA	GG	CC	CC	GG	CC	GG	GG	GG	GG	GG	TT	GG	TT	CC	GG	GG	AA	TT	TT	TT	GG	TT
CH1197	TT	TT	AA	CT	CC	AA	TT	AA	AA	AA	GG	GG	CC	AA	CC	CC	CC	TT	AA	AA	GG	AA	AA	GG
CH1203	TT	TT	AA	CT	CC	AA	NN	AA	AA	AA	GG	GG	CC	AA	CC	CC	CC	TT	AA	AA	GG	AA	AA	TT
CH1217	TT	TT	AA	CC	CC	AA	TT	AA	GG	AA	GG	GG	CC	AA	CC	CC	CC	TT	AA	AA	GG	AA	AA	TT
CH1220	TT	TT	AA	CT	CC	AA	TT	AA	AA	AA	GG	GG	CC	AA	CC	CC	CC	TT	AA	AA	GG	AA	AA	TT
CH1225	TT	TT	AA	CT	CC	AA	TT	AA	AA	AA	GG	GG	CC	AA	CC	CC	CC	TT	AA	AA	GG	AA	AA	TT
CH1228	TT	TT	AA	CT	CC	AA	TT	AA	AA	AA	GG	GG	CC	AA	CC	CC	CC	TT	AA	AA	GG	AA	AA	TT
CH1240	TT	AA	GG	CC	CC	GG	CC	GG	GG	GG	GG	GG	TT	GG	TT	CC	GG	GG	AA	TT	TT	TT	GG	TT
CH1252	TT	TT	AA	CT	CC	AA	NN	AA	AA	AA	GG	GG	CC	AA	CC	CC	CC	TT	AA	AA	GG	AA	AA	TT
CH1256	TT	TT	AA	CT	CC	AA	TT	AA	NN	NN	GG	GG	CC	AA	CC	CC	CC	TT	AA	AA	GG	AA	AA	TT
CH1257	TT	AA	GG	CC	CC	GG	CC	GG	GG	GG	GG	GG	TT	GG	TT	CC	GG	GG	AA	TT	TT	TT	GG	TT
CH1258	TT	TT	AA	CT	CC	AA	TT	AG	AA	AA	GG	GG	CC	AA	CC	CC	CC	TT	AA	AA	GG	AA	AA	TT
CH1262	TT	TT	AA	CT	CC	AA	TT	AA	AA	AA	GG	GG	CC	AA	CC	CC	CC	TT	AA	AA	GG	AA	AA	TT
CH1263	TT	TT	AA	CT	CC	AA	NN	NN	AA	AA	GG	GG	CC	AA	CC	CC	CC	TT	AA	AA	GG	AA	AA	TT
CH1266	AA	AA	AA	TT	TT	GG	CC	GG	GG	GG	AA	GG	CC	GG	CC	AA	CC	TT	TT	TT	GG	TT	GG	TT
CH1271	TT	TT	AA	CT	CC	AA	TT	AA	AA	AA	GG	GG	CC	AA	CC	CC	CC	TT	AA	AA	GG	AA	AA	TT
CH1272	TT	TT	AA	CT	CC	AA	TT	AA	AA	AA	GG	GG	CC	AA	CC	CC	CC	TT	AA	AA	GG	AA	AA	TT
CH1273	TT	TT	AA	CT	CC	AA	TT	AA	AA	AA	GG	GG	CC	AA	CC	CC	CC	TT	AA	AA	GG	AA	AA	TT
CH1281	AA	AA	AA	TT	CT	GG	CC	GG	AG	AG	AA	GG	CC	GG	CC	AA	CC	TT	TT	TT	GG	TT	GG	TT
CH1285	TT	TT	AA	CT	CC	AA	NN	AA	NN	NN	GG	GG	CC	AA	CC	CC	CC	TT	AA	AA	GG	AA	AA	TT
CH1286	TT	TT	AA	CT	CC	AA	TT	AA	AA	AA	GG	GG	CC	AA	CC	CC	CC	TT	AA	AA	GG	AA	AA	GG
CH1294	TT	TT	AA	CT	CC	AA	TT	AA	AA	AA	GG	GG	CC	AA	CC	CC	CC	TT	AA	AA	GG	AA	AA	TT
CH1295	TT	TT	AA	CT	CC	AA	TT	AA	AA	AA	GG	GG	CC	AA	CC	CC	CC	TT	AA	AA	GG	AA	AA	TT
CH1058	TT	AA	GG	CC	CC	GG	CC	GG	GG	GG	GG	GG	TT	GG	TT	CC	GG	GG	AA	TT	TT	TT	GG	TT
CH1084	TT	AA	GG	CC	CC	GG	CC	GG	GG	GG	NN	NN	NN	GG	TT	CC	GG	GG	AA	TT	NN	TT	GG	TT
CH1178	TT	NN	NN	CT	CC	AA	TT	AA	AA	NN	NN	GG	CC	AA	CC	CC	CC	TT	AA	AA	NN	AA	AA	TT
CH1052	TT	AA	AA	CC	NN	NN	NN	AA	NN	NN	NN	NN	NN	AA	CC	CC	CC	TT	AA	AA	GG	AA	NN	TT
CH1160	TT	AA	GG	CC	CC	GG	CC	GG	NN	NN	NN	NN	TT	GG	TT	CC	GG	GG	AA	TT	TT	TT	GG	TT
CH1157	TT	TT	AA	CC	CC	AA	TT	NN	NN	NN	NN	NN	NN	AA	CC	CC	CC	TT	AA	AA	GG	AA	AA	TT
CH1079	TT	TT	AA	TT	CC	AA	TT	NN	AA	AA	GG	GG	CC	AA	CC	CC	CC	TT	AA	AA	GG	AA	AA	TT
