# Supplementary material for: Natural Variation OsCd1<sup>V449</sup> Contributes to Reducing Cadmium Accumulation in Rice Grain
Source: Preprints.org preprint supplement (doi:10.20944/preprints201802.0075.v1), 2018-02-09
Supplement: Supplementary file 8 [file Table S7.xlsx]

## Sheet: Table S7
Supplementary Table 7 The haplotype of OsCd1 separated by SNP22
Haplotype		SNP22
OsCd1-V449		T
OsCd1-D449		A
Taxa	3:846037	Grain Cd Concentration (mg/kg)
CH1305	TT	0.152389
CX181	TT	0.162604
CX333	TT	0.105859
CH1003	TT	0.204727
CH1005	TT	0.263791
CH1027	TT	0.228131
CH1029	TT	0.156942
CH1035	TT	0.107529
CH1054	TT	0.47427
CH1060	TT	0.195344
CH1118	TT	0.150515
CH1119	TT	0.126673
CH1183	TT	0.0849109
CH1184	TT	0.0436978
CH1196	TT	0.15953
CH1223	TT	0.273913
CH1230	TT	0.183116
CH1250	TT	0.16368
CH1289	TT	0.414753
CH1291	TT	0.116914
CH1002	TT	0.314382
CH1010	TT	0.146043
CH1026	TT	0.308605
CH1083	TT	0.147747
CH1125	TT	0.136527
CH1187	TT	0.132551
CH1195	TT	0.0641238
CH1240	TT	0.195923
CH1257	TT	0.193887
CH1266	TT	0.326867
CH1281	TT	0.128447
CH1058	TT	0.111147
CH1084	TT	0.25091
CH1160	TT	0.101115
CX198	AA	0.381398
CH1015	AA	0.535718
CH1017	AA	0.809164
CH1034	AA	0.374365
CH1044	AA	0.479197
CH1063	AA	0.2713
CH1082	AA	0.247862
CH1100	AA	0.38672
CH1102	AA	0.952408
CH1104	AA	0.79649
CH1109	AA	0.185992
CH1110	AA	0.452132
CH1131	AA	0.215872
CH1132	AA	0.333461
CH1141	AA	0.435108
CH1148	AA	0.28862
CH1149	AA	0.280181
CH1150	AA	0.253687
CH1155	AA	0.11215
CH1158	AA	0.382665
CH1159	AA	0.671188
CH1164	AA	0.354889
CH1166	AA	0.235668
CH1167	AA	0.260125
CH1186	AA	0.377321
CH1194	AA	0.19493
CH1204	AA	0.611883
CH1209	AA	0.476568
CH1210	AA	0.554284
CH1219	AA	0.645302
CH1227	AA	0.752785
CH1232	AA	0.17845
CH1234	AA	0.486339
CH1243	AA	0.267472
CH1245	AA	0.405754
CH1248	AA	0.275733
CH1251	AA	0.126878
CH1255	AA	0.249512
CH1265	AA	0.448643
CH1276	AA	0.375872
CH1277	AA	0.473388
CH1278	AA	0.307055
CH1284	AA	0.312179
CH1050	AA	0.282661
CH1057	AA	0.259904
CH1074	AA	0.176668
CH1093	AA	0.246633
CH1095	AA	0.467711
CH1106	AA	0.451529
CH1107	AA	0.47842
CH1111	AA	0.461943
CH1112	AA	0.267317
CH1114	AA	0.857621
CH1115	AA	0.694469
CH1130	AA	0.124509
CH1146	AA	0.622146
CH1147	AA	0.319366
CH1156	AA	0.583745
CH1171	AA	0.180577
CH1173	AA	0.397244
CH1197	AA	0.1706
CH1203	AA	0.675466
CH1217	AA	1.31579
CH1220	AA	0.972621
CH1225	AA	0.205224
CH1228	AA	0.624907
CH1252	AA	0.478061
CH1256	AA	0.351084
CH1258	AA	0.396367
CH1262	AA	0.315649
CH1263	AA	0.27688
CH1271	AA	1.02825
CH1272	AA	0.258284
CH1273	AA	0.357857
CH1285	AA	0.159946
CH1286	AA	0.47363
CH1294	AA	0.372265
CH1178	AA	0.229812
CH1052	AA	0.336234
CH1157	AA	0.279671
CH1079	AA	0.422635
CX158	AA	0.537366
