# Supplementary material for: Natural Variation OsCd1<sup>V449</sup> Contributes to Reducing Cadmium Accumulation in Rice Grain
Source: Preprints.org preprint supplement (doi:10.20944/preprints201802.0075.v1), 2018-02-09
Supplement: Supplementary file 9 [file Table S9.xlsx]

## Sheet: 工作表1
Supplementary Table 9. The SNP22 in 127 rice cultivars
Taxa	J/I	SNP22			J/I: japonica/indica
CH1015	indica	AA
CH1017	indica	AA
CH1034	indica	AA
CH1044	indica	AA
CH1050	indica	AA
CH1052	japonica	AA
CH1057	indica	AA
CH1063	indica	AA
CH1074	indica	AA
CH1079	indica	AA
CH1082	indica	AA
CH1093	indica	AA
CH1095	indica	AA
CH1100	indica	AA
CH1102	indica	AA
CH1104	indica	AA
CH1106	indica	AA
CH1107	indica	AA
CH1109	indica	AA
CH1110	indica	AA
CH1111	indica	AA
CH1112	indica	AA
CH1114	indica	AA
CH1115	indica	AA
CH1130	indica	AA
CH1131	indica	AA
CH1132	indica	AA
CH1141	indica	AA
CH1146	indica	AA
CH1147	indica	AA
CH1148	japonica	AA
CH1149	indica	AA
CH1150	japonica	AA
CH1155	indica	AA
CH1156	indica	AA
CH1157	indica	AA
CH1158	indica	AA
CH1159	indica	AA
CH1164	indica	AA
CH1166	indica	AA
CH1167	indica	AA
CH1168	indica	AA
CH1171	indica	AA
CH1173	indica	AA
CH1178	indica	AA
CH1186	indica	AA
CH1194	indica	AA
CH1197	indica	AA
CH1203	indica	AA
CH1204	indica	AA
CH1209	indica	AA
CH1210	indica	AA
CH1217	indica	AA
CH1219	indica	AA
CH1220	indica	AA
CH1225	indica	AA
CH1227	indica	AA
CH1228	indica	AA
CH1232	indica	AA
CH1234	indica	AA
CH1243	indica	AA
CH1245	indica	AA
CH1248	japonica	AA
CH1251	indica	AA
CH1252	indica	AA
CH1253	indica	AA
CH1255	indica	AA
CH1256	indica	AA
CH1258	indica	AA
CH1262	indica	AA
CH1263	indica	AA
CH1265	indica	AA
CH1271	indica	AA
CH1272	indica	AA
CH1273	indica	AA
CH1276	indica	AA
CH1277	indica	AA
CH1278	indica	AA
CH1284	indica	AA
CH1285	indica	AA
CH1286	indica	AA
CH1294	indica	AA
CH1295	indica	AA
CX158	indica	AA
CX198	indica	AA
CH1021	japonica	AT
CH1062	indica	AT
CH1126	indica	AT
CH1002	japonica	TT
CH1003	japonica	TT
CH1005	japonica	TT
CH1010	japonica	TT
CH1026	japonica	TT
CH1027	japonica	TT
CH1029	indica	TT
CH1035	japonica	TT
CH1054	japonica	TT
CH1058	japonica	TT
CH1060	japonica	TT
CH1083	japonica	TT
CH1084	japonica	TT
CH1118	japonica	TT
CH1119	japonica	TT
CH1125	japonica	TT
CH1160	japonica	TT
CH1180	japonica	TT
CH1183	japonica	TT
CH1184	japonica	TT
CH1187	japonica	TT
CH1195	japonica	TT
CH1196	japonica	TT
CH1206	japonica	TT
CH1223	japonica	TT
CH1230	indica	TT
CH1240	japonica	TT
CH1247	indica	TT
CH1250	japonica	TT
CH1257	japonica	TT
CH1266	japonica	TT
CH1274	japonica	TT
CH1281	japonica	TT
CH1288	japonica	TT
CH1289	japonica	TT
CH1291	japonica	TT
CH1305	japonica	TT
CX181	japonica	TT
CX333	japonica	TT
